# Supplementary material
Source: PubMed Central journal article supplement (PMC3165313)
Supplement: supp_55_9_4114__1.pdf [file supp_55_9_4114__1.pdf]

**Table S1. Primers used for probe preparation by PCR**

| Target                      | Primer name                    | Sequence (5'→3')     | Position |         | Accession number |
|-----------------------------|--------------------------------|----------------------|----------|---------|------------------|
|                             |                                |                      | Start    | End     |                  |
| <i>rrlH</i> (23S rRNA)      | 23S-1F                         | CGATGGGAAACGGGTTAATA | 292794   | 292813  | AE006468         |
|                             | 23S-1R                         | CTTGCGCTGACCCCATCAAT | 293293   | 293274  | AE006468         |
| <i>rrlH</i> (23S rRNA)      | 23S-2F                         | TGTCGGGTAAGTTCCGACCT | 293364   | 293383  | AE006468         |
|                             | 23S-2R                         | GGAGTACCTTTTATCCGTTG | 293863   | 293844  | AE006468         |
| <i>bla</i> <sub>CMY-2</sub> | b1c1F                          | TTTATCCAATCCGCGCTCGA | 57894    | 57918   | AB571791         |
|                             | <i>bla</i> <sub>CMY-2</sub> R  | TTCCCGCGTTGAGGTAAAC  | 58363    | 58344   | AB571791         |
| <i>floR</i>                 | 1-93194F                       | TGCCGAAAATTCAGATGCTC | 93194    | 93213   | AB571791         |
|                             | <i>flo</i> RR                  | GTATTGTCTTCACGGTGTCC | 93593    | 93574   | AB571791         |
| <i>aphA7</i>                | 2-431F                         | TGCGCCGGTTGCATTGATT  | 431      | 450     | AB571792         |
|                             | 2-866R                         | TATCAGAAAAACTCATCGAG | 866      | 847     | AB571792         |
| <i>bla</i> <sub>TEM-1</sub> | <i>bla</i> <sub>TEM-1</sub> F1 | AGCATCTTACGGATGGCATG | 518      | 537     | AB571794         |
|                             | <i>bla</i> <sub>TEM-1</sub> R1 | AGTGAGGCACCTATCTCAGC | 1037     | 1018    | AB571794         |
| <i>tetA</i>                 | <i>tet</i> AF1                 | GGCACAGGCTACATCCTGCT | 2022     | 2041    | AB571795         |
|                             | <i>tet</i> AR1                 | TCAAATCATCGGCGTCTGC  | 2491     | 2472    | AB571795         |
| <i>spvB</i>                 | <i>spv</i> BF                  | AGCAGTTTTTATCGCCTGGA | 29546    | 29527   | AE006471         |
|                             | <i>spv</i> BR                  | GGTGGAACATCAGGACTTGG | 29021    | 29040   | AE006471         |
| STM0558                     | STM0558F                       | GATTACGTTCTGGCATCTGT | 616841   | 616860  | AE006468         |
|                             | STM0558R                       | GGTCTTCAATGAAGAAGCCA | 617340   | 617321  | AE006468         |
| STM1330                     | STM1330F                       | CTGCCCGTAGTATTATTAAG | 1408561  | 1408580 | AE006468         |
|                             | STM1330R                       | ACCCGGTTTTCCAGTGCAGC | 1409030  | 1409011 | AE006468         |
| L-3553_1.021c               | 1.021cF                        | TGGAACTCAAGGCCATTACC | 17333    | 17352   | AB571791         |
|                             | 1.021cR                        | TTTCGGCTTTCTAGCTCTGG | 17785    | 17766   | AB571791         |

**Table S2. Primers used for amplification of antimicrobial resistance regions located on pST3553**

| Region   | Primer name | Sequence (5'→3')     | Position |      | Accession number |
|----------|-------------|----------------------|----------|------|------------------|
|          |             |                      | Start    | End  |                  |
| L-3553_2 | 2-1F        | TGAACAATAAACTGTCTGC  | 1        | 20   | AB571792         |
|          | 2-866R      | TATCAGAAAACTCATCGAG  | 866      | 847  | AB571792         |
| L-3553_3 | 3-1F        | ACCCTGGTAAATGCTTCAAT | 1        | 20   | AB571793         |
|          | 3-1040R     | ACGCTCAGTGGAACGAAAAC | 1040     | 1021 | AB571793         |
| L-3553_4 | 4-1F        | GGCCTCGTGATACGCCTATT | 1        | 20   | AB571794         |
|          | 4-1330R     | AGTGTCAGCAGGTTCTGATA | 1567     | 1548 | AB571794         |
| L-3553_5 | 5-1F        | ATAGCCGGTTCTCGCAAGGA | 1        | 20   | AB571795         |
|          | 5-2941R     | TAGCCCGATACGATTGATGG | 2941     | 2922 | AB571795         |

**Table S3. Primers used for PCR scanning of the GI-VII-6**

| Segment | Primer name | Sequence (5'→3')               | Position <sup>a</sup> |        |
|---------|-------------|--------------------------------|-----------------------|--------|
|         |             |                                | Start                 | End    |
| 1       | S1-F        | TAAGCGGCAGGCTACTATCG           | 1                     | 20     |
|         | S1-R        | CAGGATCAAAGTGCCTATG            | 2457                  | 2438   |
| 2       | S2-F        | AACGTAGATCGGTGAGAGATCGGAAGCGAG | 1511                  | 1540   |
|         | S2-R        | CTCAATGAAGATGAACAAGGCCAAGCCAAC | 12173                 | 12144  |
| 3       | S3-F        | AACTGCGGGTCAAGGATCTGGATTTGATC  | 6172                  | 6201   |
|         | S3-R        | CAAGCTCTGGAGCGTACTGACGGTAAAACA | 16611                 | 16582  |
| 4       | S4-F        | GCTGGTTTCAGCGTAGAACCAACCGGCATA | 16222                 | 16251  |
|         | S4-R        | CATTCAGTCAGCAATTGACTGCTCTCTGGA | 26691                 | 26662  |
| 5       | S5-F        | CCTTGCCATCAGCTTCCATGAACCAACCGA | 26302                 | 26331  |
|         | S5-R        | TGAGGTGCTGGTAAACGCAGAGACACAGAC | 36771                 | 36742  |
| 6       | S6-F        | GCGAAACGCTGTTGCAGGTAAACCAACATC | 36382                 | 36411  |
|         | S6-R        | AAGAGCGTTCTGGTGGCGTTGATGTTCTCT | 46851                 | 46822  |
| 7       | S7-F        | CATTCCTCCGGGATGCCACGGAACACAAT  | 46462                 | 46491  |
|         | S7-R        | TACCCGCACAGGGATAGAGGCCTTGCTTAA | 56931                 | 56902  |
| 8       | S8-F        | TACGGGAGGGAGTGCATAAACATGGGCTGT | 56542                 | 56571  |
|         | S8-R        | TGGTGGCAAAGATGTAATCAATCTGCGGG  | 67055                 | 67026  |
| 9       | S9-F        | CCAACCTGCTCTGGATCAACCTTGTCGATG | 66551                 | 66580  |
|         | S9-R        | TTTGATAGCTTCGAGTGGCGCTCAGGTCAT | 77125                 | 77096  |
| 10      | S10-F       | GTCTCAGGAAAGGAAAAGCCCCTGGCAAGA | 76746                 | 76775  |
|         | S10-R       | GTTTGCTCATTCAAGTAGCCGGTACTTGCC | 87205                 | 87176  |
| 11      | S11-F       | TAAAAGGCCTGCTGGATACAGAGGGTACTC | 86816                 | 86845  |
|         | S11-R       | GCCAAGGCACTTGGTATCAG           | 93189                 | 93170  |
| 12      | S12-F       | AAATTCCTGTTGCACATAGC           | 92716                 | 92735  |
|         | S12-R       | GTACCGAAGCCCAGAGTCAA           | 96051                 | 96032  |
| 13      | S13-F       | CCCTCCTCTTCCCACTAGC            | 95571                 | 95590  |
|         | S13-R       | CACCAGGAGCAGAAGCACGT           | 98905                 | 98886  |
| 14      | S14-F       | ACTTATCCGATGCGAGCGGC           | 98826                 | 98845  |
|         | S14-R       | GCTTCTGCAGTTCGCCAACC           | 100105                | 100086 |
| 15      | S15-F       | AGGATTCGGTAGTGCTCTG            | 99846                 | 99865  |
|         | S15-R       | GGCTATGGCC GCTTTCTTTT          | 101125                | 101106 |
| 16      | S16-F       | CCGCACCCTATACATTTAGC           | 101016                | 101035 |
|         | S16-R       | TTGAACAGGAGCCGAAACCATCGTGGTGA  | 107365                | 107336 |
| 17      | S17-F       | CAGCGAGCTGCACACCTTCATCAAAGGGAA | 106976                | 107005 |
|         | S17-R       | CTGACCACGTTGACGAAAAGATGCAAACGC | 117290                | 117261 |
| 18      | S18-F       | TGGCTTGCTGGTTGATCAATTGGCTTTGAG | 116952                | 116981 |
|         | S18-R       | GCTACAGAGATCTTCACATCAACCCAGACT | 124943                | 124914 |
| 19      | S19-F       | CTCGATACCAGCTTTGGCCG           | 124792                | 124811 |
|         | S19-R       | TTGGATGCTGTATGCAATAC           | 127710                | 127691 |

<sup>a</sup>Nucleotide no. described in AB571791

**Table S4. Primers used for PCR mapping of each resistance gene**

| PCR | Primer name             | Sequence (5'→3')      | Position |       | Accession number |
|-----|-------------------------|-----------------------|----------|-------|------------------|
|     |                         |                       | Start    | End   |                  |
| 1   | 1-2251F                 | AAGGTCTCCGCGAATGTCCG  | 2251     | 2270  | AB571791         |
|     | sul1R                   | TTCAAAAGCTGAAGTCGGCG  | 2792     | 2773  | AB571791         |
| 2   | qacEΔ1F                 | ATTATGACAACGGCGGAAGG  | 3601     | 3620  | AB571791         |
|     | 1-3932R                 | TGGAAGAATTTATTCGCTTT  | 3932     | 3913  | AB571791         |
| 3   | 1-4581F                 | CCAGCAACGTTGATCCAGA   | 4581     | 4600  | AB571791         |
|     | dfrA12R                 | TTCTCCCAATGCTCAACGA   | 5180     | 5161  | AB571791         |
| 4   | dfrA12F                 | TTGCCGATAGACTCAAAGGT  | 5401     | 5420  | AB571791         |
|     | intI1R                  | ACAGAAATGCCTCGACTTCG  | 5913     | 5894  | AB571791         |
| 5   | intI1F                  | TATGACCAGACCTTTCAGCG  | 6474     | 6493  | AB571791         |
|     | 1-6940R                 | CACATGGTGTGTTTTTCAGA  | 6940     | 6921  | AB571791         |
| 6   | 1-56894F                | CAGAATGATTAAGCAAGGCC  | 56894    | 56913 | AB571791         |
|     | sugE1R                  | AGAGAGCATGGCGATACTGA  | 57363    | 57344 | AB571791         |
| 7   | blc1F                   | TTTATCCAATCCGCGCTCGA  | 57894    | 57913 | AB571791         |
|     | bla <sub>CMY-2</sub> R  | TTCCCGCCGTTGAGGTAAAC  | 58363    | 58344 | AB571791         |
| 8   | bla <sub>CMY-2</sub> F  | AACGTCTTACTAACCGATCC  | 59044    | 59063 | AB571791         |
|     | ISEcp1R                 | GCTCTGTGGATAAATTGCGAG | 59603    | 59584 | AB571791         |
| 9   | 1-87554F                | TCCAGATGTATGCTATTCTG  | 87554    | 87573 | AB571791         |
|     | sul2R                   | TGAGATAGGCCACACCACGC  | 87993    | 87974 | AB571791         |
| 10  | sul2F                   | ATTGCGGCTGCGCTTCGATT  | 88274    | 88293 | AB571791         |
|     | strAR                   | CTCGACCTTTGAGCCAAATG  | 88743    | 88724 | AB571791         |
| 11  | strAF                   | AACTCTCAATGCACGGGTC   | 89144    | 89163 | AB571791         |
|     | strBR                   | TCGGCAACGATGTGAGAGAG  | 89643    | 89624 | AB571791         |
| 12  | strBF                   | GAGACGACCTTTGTCTCGAT  | 89994    | 90013 | AB571791         |
|     | tetRR2                  | ATGGATTGGCGAAAAGGAGG  | 90843    | 90824 | AB571791         |
| 13  | tetAF2                  | TTGTCCAGGCAGGTGGATGA  | 92504    | 92523 | AB571791         |
|     | 1-92993R                | TGGCTGGCAATGTCTAGCAA  | 92993    | 92974 | AB571791         |
| 14  | 1-93194F                | TGCCGAAAATTCAGATGCTC  | 93194    | 93213 | AB571791         |
|     | floRR                   | GTATTGTCTTCACGGTGTCC  | 93593    | 93574 | AB571791         |
| 15  | floRF                   | AGAATTGGCCGTCGCCCGAT  | 94304    | 94323 | AB571791         |
|     | 1-94773R                | GAACGCTGAGTGCGCCCATG  | 94773    | 94754 | AB571791         |
| 16  | 2-1F                    | TGAACAATAAACTGTCTGC   | 1        | 20    | AB571792         |
|     | 2-866R                  | TATCAGAAAACTCATCGAG   | 866      | 847   | AB571792         |
| 17  | 3-1F                    | ACCCTGGTAAATGCTTCAAT  | 1        | 20    | AB571793         |
|     | bla <sub>TEM-1</sub> R2 | AGTACTCAACCAAGTCATTC  | 350      | 331   | AB571793         |
| 18  | bla <sub>TEM-1</sub> F2 | GATAAATCTGGAGCCGGTGA  | 731      | 750   | AB571793         |
|     | 3-1040R                 | ACGCTCAGTGAACGAAAAC   | 1040     | 1021  | AB571793         |
| 19  | 4-1F                    | GGCCTCGTGATACGCCTATT  | 1        | 20    | AB571794         |
|     | bla <sub>TEM-1</sub> R2 | AGTACTCAACCAAGTCATTC  | 502      | 483   | AB571794         |
| 20  | bla <sub>TEM-1</sub> F2 | GATAAATCTGGAGCCGGTGA  | 883      | 902   | AB571794         |
|     | 4-1330R                 | AGCGCCTTACCGAGCAGAAA  | 1330     | 1311  | AB571794         |
| 21  | tetAF2                  | TTGTCCAGGCAGGTGGATGA  | 2130     | 2149  | AB571795         |
|     | 5-2630R                 | GAGCGGGTTTAACCTACTTC  | 2630     | 2611  | AB571795         |

**Table S5. Characteristics of ORFs in genomic island GI-VII-6**

| ORF           | Gene          | Location <sup>a</sup><br>(start-stop) | Length<br>(amino acid) | Product                                                  | Accession no. and sequence similarity                                                                    | %<br>Identity |
|---------------|---------------|---------------------------------------|------------------------|----------------------------------------------------------|----------------------------------------------------------------------------------------------------------|---------------|
| L-3553_1.001  |               | 52-672                                | 206                    | Regulatory protein                                       | AE006468; STM0869, Regulatory protein, <i>Salmonella</i> Typhimurium strain LT2                          | 100           |
| L-3553_1.002  | <i>insB1</i>  | 736-1452                              | 238                    | IS26 transposase                                         | FJ621588; InsB, plasmid pAR060302 ( <i>Escherichia</i>                                                   | 100           |
| L-3553_1.003c |               | 1881-1594                             | 95                     | Hypothetical protein                                     | FJ621588; hypothetical protein, plasmid pAR060302 ( <i>E. coli</i> )                                     | 100           |
| L-3553_1.004c |               | 2405-1905                             | 166                    | Hypothetical protein                                     | FJ621588; hypothetical protein, plasmid pAR060302 ( <i>E. coli</i> )                                     | 100           |
|               |               |                                       |                        |                                                          | HQ332785; hypothetical protein, plasmid pCK41 ( <i>Edwardsiella tarda</i> )                              | 100           |
| L-3553_1.005c | <i>sul1</i>   | 3372-2533                             | 279                    | Dihydropteroate synthase                                 | FJ621588; Sul 1, plasmid pAR060302 ( <i>E. coli</i> )                                                    | 100           |
|               |               |                                       |                        |                                                          | HQ332785; dihydropteroate synthase, plasmid pCK41 ( <i>E. tarda</i> )                                    | 100           |
| L-3553_1.006c | <i>qacEA1</i> | 3713-3366                             | 115                    | Quaternary ammonium compound-resistance protein          | FJ621588; QacEdelta1, plasmid pAR060302 ( <i>E. coli</i> )                                               | 100           |
| L-3553_1.007c | <i>aadA2</i>  | 4668-3877                             | 263                    | Aminoglycoside adenylyltransferase                       | HQ332785; aminoglycoside resistance protein, plasmid pCK41 ( <i>E. tarda</i> )                           | 100           |
| L-3553_1.008c | <i>dfrA12</i> | 5573-5076                             | 165                    | Dihydrofolate reductase                                  | HQ332785; dihydrofolate reductase, plasmid pCK41 ( <i>E. tarda</i> )                                     | 100           |
| L-3553_1.009  | <i>int1</i>   | 5718-6731                             | 337                    | Class 1 integrase                                        | HQ332785; integrase, plasmid pCK41 ( <i>E. tarda</i> )                                                   | 99            |
|               |               |                                       |                        |                                                          | FJ621588; Int1, plasmid pAR060302 ( <i>E. coli</i> )                                                     | 99            |
| L-3553_1.010  |               | 7037-7594                             | 185                    | Resolvase                                                | FJ621588; resolvase family recombinase family protein, plasmid pAR060302 ( <i>E. coli</i> )              | 100           |
| L-3553_1.011  | <i>tnpA</i>   | 7597-10569                            | 990                    | Transposase                                              | FJ621588; TnpA, plasmid pAR060302 ( <i>E. coli</i> )                                                     | 99            |
| L-3553_1.012  | <i>tnpA</i>   | 10648-11652                           | 334                    | IS4321 transposase                                       | FJ621588; InsD2, plasmid pAR060302 ( <i>E. coli</i> )                                                    | 100           |
| L-3553_1.013c |               | 12067-11834                           | 77                     | Hypothetical protein                                     | FJ621588; hypothetical protein, plasmid pAR060302 ( <i>E. coli</i> )                                     | 100           |
| L-3553_1.014c |               | 12406-12128                           | 92                     | Hypothetical protein                                     | FJ621588; hypothetical protein, plasmid pAR060302 ( <i>E. coli</i> )                                     | 100           |
| L-3553_1.015c |               | 14120-12393                           | 575                    | Primase-helicase family protein                          | FJ621588; primase-helicase family protein, plasmid pAR060302 ( <i>E. coli</i> )                          | 100           |
| L-3553_1.016c |               | 14684-14298                           | 128                    | Hypothetical protein                                     | FJ621588; hypothetical protein, plasmid pAR060302 ( <i>E. coli</i> )                                     | 100           |
| L-3553_1.017c |               | 16027-15143                           | 294                    | Hypothetical protein                                     | FJ621588; hypothetical protein, plasmid pAR060302 ( <i>E. coli</i> )                                     | 100           |
| L-3553_1.018c |               | 16626-16069                           | 185                    | Hypothetical protein                                     | FJ621588; hypothetical protein, plasmid pAR060302 ( <i>E. coli</i> )                                     | 100           |
| L-3553_1.019c |               | 16951-16700                           | 83                     | Hypothetical protein                                     | FJ621588; hypothetical protein, plasmid pAR060302 ( <i>E. coli</i> )                                     | 100           |
| L-3553_1.020c |               | 17201-16932                           | 89                     | Hypothetical protein                                     | FJ621588; hypothetical protein, plasmid pAR060302 ( <i>E. coli</i> )                                     | 100           |
| L-3553_1.021c |               | 17799-17194                           | 201                    | HD phosphohydrolase family protein                       | FJ621588; HD phosphohydrolase family protein, plasmid pAR060302 ( <i>E. coli</i> )                       | 100           |
| L-3553_1.022c |               | 18074-17871                           | 67                     | Hypothetical protein                                     | FJ621588; hypothetical protein, plasmid pAR060302 ( <i>E. coli</i> )                                     | 100           |
| L-3553_1.023c |               | 20729-18276                           | 817                    | Phosphoadenosine phosphosulfate reductase family protein | FJ621588; phosphoadenosine phosphosulfate reductase family protein, plasmid pAR060302 ( <i>E. coli</i> ) | 100           |
| L-3553_1.024c |               | 21203-20817                           | 128                    | Hypothetical protein                                     | FJ621588; hypothetical protein, plasmid pAR060302 ( <i>E. coli</i> )                                     | 100           |
| L-3553_1.025c |               | 21990-21436                           | 184                    | Hypothetical protein                                     | FJ621588; hypothetical protein, plasmid pAR060302 ( <i>E. coli</i> )                                     | 100           |
| L-3553_1.026c |               | 22495-22064                           | 143                    | Hypothetical protein                                     | FJ621588; hypothetical protein, plasmid pAR060302 ( <i>E. coli</i> )                                     | 100           |
| L-3553_1.027c |               | 24181-22556                           | 541                    | C-5 cytosine-specific DNA methylase                      | FJ621588; Dcm, plasmid pAR060302 ( <i>E. coli</i> )                                                      | 100           |
| L-3553_1.028c |               | 24642-24259                           | 127                    | Hypothetical protein                                     | FJ621588; hypothetical protein, plasmid pAR060302 ( <i>E. coli</i> )                                     | 99            |
| L-3553_1.029c |               | 24983-24639                           | 114                    | Hypothetical protein                                     | FJ621588; hypothetical protein, plasmid pAR060302 ( <i>E. coli</i> )                                     | 100           |
| L-3553_1.030c |               | 25528-25175                           | 117                    | Hypothetical protein                                     | FJ621588; hypothetical protein, plasmid pAR060302 ( <i>E. coli</i> )                                     | 100           |
| L-3553_1.031c |               | 25788-25597                           | 63                     | Hypothetical protein                                     | FJ621588; hypothetical protein, plasmid pAR060302 ( <i>E. coli</i> )                                     | 100           |
| L-3553_1.032c |               | 26121-25846                           | 91                     | Hypothetical protein                                     | FJ621588; hypothetical protein, plasmid pAR060302 ( <i>E. coli</i> )                                     | 100           |
| L-3553_1.033c |               | 26578-26126                           | 150                    | Hypothetical protein                                     | FJ621588; hypothetical protein, plasmid pAR060302 ( <i>E. coli</i> )                                     | 100           |
| L-3553_1.034c |               | 26957-26568                           | 129                    | Hypothetical protein                                     | FJ621588; hypothetical protein, plasmid pAR060302 ( <i>E. coli</i> )                                     | 100           |

|                |                            |             |      |                                                                         |                                                                                                                         |     |
|----------------|----------------------------|-------------|------|-------------------------------------------------------------------------|-------------------------------------------------------------------------------------------------------------------------|-----|
| L-3553_1.035c  |                            | 27243-27019 | 74   | Ferredoxin family member protein                                        | FJ621588ferredoxin family member protein, plasmid pAR060302 ( <i>E. coli</i> )                                          | 100 |
| L-3553_1.036c  |                            | 28193-27309 | 294  | Hypothetical protein                                                    | FJ621588; hypothetical protein, plasmid pAR060302 ( <i>E. coli</i> )                                                    | 100 |
| L-3553_1.037c  |                            | 28767-28267 | 166  | Hypothetical protein                                                    | FJ621588; hypothetical protein, plasmid pAR060302 ( <i>E. coli</i> )                                                    | 100 |
| L-3553_1.038c  |                            | 29397-28858 | 179  | Hypothetical protein                                                    | FJ621588; hypothetical protein, plasmid pAR060302 ( <i>E. coli</i> )                                                    | 100 |
| L-3553_1.039c  |                            | 29997-29662 | 111  | Hypothetical protein                                                    | FJ621588; hypothetical protein, plasmid pAR060302 ( <i>E. coli</i> )                                                    | 100 |
| L-3553_1.0340c |                            | 31855-30059 | 598  | Hypothetical protein                                                    | FJ621588; hypothetical protein, plasmid pAR060302 ( <i>E. coli</i> )                                                    | 100 |
| L-3553_1.041c  |                            | 33217-31940 | 425  | Hypothetical protein                                                    | FJ621588; hypothetical protein, plasmid pAR060302 ( <i>E. coli</i> )                                                    | 100 |
| L-3553_1.042c  |                            | 34427-33417 | 336  | Hypothetical protein                                                    | FJ621588; hypothetical protein, plasmid pAR060302 ( <i>E. coli</i> )                                                    | 100 |
| L-3553_1.043c  |                            | 35479-34490 | 329  | Phage recombination protein                                             | FJ621588; Bet, plasmid pAR060302 ( <i>E. coli</i> )                                                                     | 100 |
| L-3553_1.044c  |                            | 36104-35574 | 176  | Single-stranded DNA-binding protein                                     | FJ621588; Ssb, plasmid pAR060302 ( <i>E. coli</i> )                                                                     | 100 |
| L-3553_1.045c  |                            | 37073-36165 | 302  | Hypothetical protein                                                    | FJ621588; hypothetical protein, plasmid pAR060302 ( <i>E. coli</i> )                                                    | 100 |
| L-3553_1.046c  | <i>bet</i>                 | 38052-37084 | 322  | ATPase associated with various cellular activities (AAA) family protein | FJ621588; ATPase associated with various cellular activities (AAA) family protein, plasmid pAR060302 ( <i>E. coli</i> ) | 100 |
| L-3553_1.047c  | <i>ssb</i>                 | 38523-38272 | 83   | Hypothetical protein                                                    | FJ621588; hypothetical protein, plasmid pAR060302 ( <i>E. coli</i> )                                                    | 100 |
| L-3553_1.048c  |                            | 39162-38761 | 133  | Hypothetical protein                                                    | FJ621588; hypothetical protein, plasmid pAR060302 ( <i>E. coli</i> )                                                    | 100 |
| L-3553_1.049   |                            | 39376-40017 | 213  | Hypothetical protein                                                    | FJ621588; hypothetical protein, plasmid pAR060302 ( <i>E. coli</i> )                                                    | 100 |
| L-3553_1.050   |                            | 40140-41000 | 286  | Hypothetical protein                                                    | FJ621588; hypothetical protein, plasmid pAR060302 ( <i>E. coli</i> )                                                    | 100 |
| L-3553_1.051c  | <i>traN</i>                | 43846-41039 | 935  | Type IV conjugative transfer system protein                             | FJ621588; TraN, plasmid pAR060302 ( <i>E. coli</i> )                                                                    | 100 |
| L-3553_1.052c  | <i>traU</i>                | 44957-43950 | 335  | Type IV conjugative transfer system protein                             | FJ621588; TraU, plasmid pAR060302 ( <i>E. coli</i> )                                                                    | 100 |
| L-3553_1.053c  |                            | 45625-44954 | 223  | Hypothetical protein                                                    | FJ621588; hypothetical protein, plasmid pAR060302 ( <i>E. coli</i> )                                                    | 100 |
| L-3553_1.054c  | <i>traW</i>                | 46887-45622 | 421  | Type IV conjugative transfer system protein                             | FJ621588; TraW, plasmid pAR060302 ( <i>E. coli</i> )                                                                    | 100 |
| L-3553_1.055c  | <i>trhF</i>                | 47380-46850 | 176  | Type IV conjugative transfer system signal peptidase                    | FJ621588; TrhF, plasmid pAR060302 ( <i>E. coli</i> )                                                                    | 100 |
| L-3553_1.056c  |                            | 47694-47377 | 105  | Hypothetical protein                                                    | FJ621588; hypothetical protein, plasmid pAR060302 ( <i>E. coli</i> )                                                    | 100 |
| L-3553_1.057c  | <i>traC</i>                | 50156-47709 | 815  | Type IV conjugative transfer system protein                             | FJ621588; TraC, plasmid pAR060302 ( <i>E. coli</i> )                                                                    | 100 |
| L-3553_1.058c  |                            | 50860-50153 | 235  | Hypothetical protein                                                    | FJ621588; hypothetical protein, plasmid pAR060302 ( <i>E. coli</i> )                                                    | 100 |
| L-3553_1.059c  |                            | 56495-51009 | 1828 | Hypothetical protein                                                    | FJ621588; hypothetical protein, plasmid pAR060302 ( <i>E. coli</i> )                                                    | 100 |
| L-3553_1.060c  |                            | 56966-56541 | 141  | Hypothetical protein                                                    | FJ621588; hypothetical protein, plasmid pAR060302 ( <i>E. coli</i> )                                                    | 100 |
| L-3553_1.061   | <i>sugE1</i>               | 57100-57540 | 146  | Quaternary ammonium compound-resistance protein                         | FJ621588; SugE1, plasmid pAR060302 ( <i>E. coli</i> )                                                                   | 99  |
| L-3553_1.062c  | <i>b1c1</i>                | 58070-57537 | 177  | Outer membrane lipoprotein                                              | FJ621588; B1c1, plasmid pAR060302 ( <i>E. coli</i> )                                                                    | 100 |
| L-3553_1.063c  | <i>bla<sub>CMV-2</sub></i> | 59309-58164 | 381  | AmpC beta-lactamase                                                     | FJ621588; AmpC, plasmid pAR060302 ( <i>E. coli</i> )                                                                    | 100 |
| L-3553_1.064c  | <i>tnpA</i>                | 60895-59633 | 420  | Transposase                                                             | FJ621588; transposase InsC3 for insertion sequence IS <i>Ec9</i> , plasmid pAR060302 ( <i>E. coli</i> )                 | 100 |
| L-3553_1.065c  | <i>traA</i>                | 61572-61180 | 130  | Type IV conjugative transfer system protein                             | FJ621588; TraA, plasmid pAR060302 ( <i>E. coli</i> )                                                                    | 100 |
| L-3553_1.066c  | <i>traV</i>                | 62154-61576 | 192  | Type IV conjugative transfer system protein                             | FJ621588; TraV, plasmid pAR060302 ( <i>E. coli</i> )                                                                    | 100 |
| L-3553_1.067c  | <i>traB</i>                | 63467-62151 | 438  | Type IV conjugative transfer system protein                             | FJ621588; TraB, plasmid pAR060302 ( <i>E. coli</i> )                                                                    | 100 |
| L-3553_1.068c  |                            | 64381-63464 | 305  | TraK family protein                                                     | FJ621588; TraK family protein, plasmid pAR060302 ( <i>E. coli</i> )                                                     | 100 |
| L-3553_1.069c  | <i>traE</i>                | 64991-64365 | 208  | Type IV conjugative transfer system protein                             | FJ621588; TraE, plasmid pAR060302 ( <i>E. coli</i> )                                                                    | 99  |
| L-3553_1.070c  | <i>traL</i>                | 65269-64988 | 93   | Type IV conjugative transfer system protein                             | FJ621588; TraL, plasmid pAR060302 ( <i>E. coli</i> )                                                                    | 100 |
| L-3553_1.071c  |                            | 65791-65414 | 125  | Hypothetical protein                                                    | FJ621588; hypothetical protein, plasmid pAR060302 ( <i>E. coli</i> )                                                    | 100 |

|               |             |             |     |                                                |                                                                      |     |
|---------------|-------------|-------------|-----|------------------------------------------------|----------------------------------------------------------------------|-----|
| L-3553_1.072c | pseudo gene | 66739-66115 | -   | Hypothetical protein                           | FJ621588; hypothetical protein, plasmid pAR060302 ( <i>E. coli</i> ) |     |
| L-3553_1.073c |             | 67188-66811 | 125 | Hypothetical protein                           | FJ621588; hypothetical protein, plasmid pAR060302 ( <i>E. coli</i> ) | 100 |
| L-3553_1.074c |             | 67644-67198 | 148 | Hypothetical protein                           | FJ621588; hypothetical protein, plasmid pAR060302 ( <i>E. coli</i> ) | 100 |
| L-3553_1.075c |             | 68283-67654 | 209 | Hypothetical protein                           | FJ621588; hypothetical protein, plasmid pAR060302 ( <i>E. coli</i> ) | 100 |
| L-3553_1.076c |             | 68824-68240 | 194 | Hypothetical protein                           | FJ621588; hypothetical protein, plasmid pAR060302 ( <i>E. coli</i> ) | 100 |
| L-3553_1.077c | <i>traD</i> | 70700-68835 | 621 | Type IV conjugative transfer system protein    | FJ621588; TraD, plasmid pAR060302 ( <i>E. coli</i> )                 | 100 |
| L-3553_1.078c | <i>tral</i> | 73669-70697 | 990 | Type IV conjugative transfer system protein    | FJ621588; Tral, plasmid pAR060302 ( <i>E. coli</i> )                 | 100 |
| L-3553_1.079  |             | 73822-74454 | 210 | Hypothetical protein                           | FJ621588; hypothetical protein, plasmid pAR060302 ( <i>E. coli</i> ) | 100 |
| L-3553_1.080  |             | 74436-74669 | 77  | Hypothetical protein                           | FJ621588; hypothetical protein, plasmid pAR060302 ( <i>E. coli</i> ) | 100 |
| L-3553_1.081  | <i>topB</i> | 74669-76861 | 730 | DNA topoisomerase III                          | FJ621588; TopB, plasmid pAR060302 ( <i>E. coli</i> )                 | 100 |
| L-3553_1.082  |             | 76876-77364 | 162 | Hypothetical protein                           | FJ621588; hypothetical protein, plasmid pAR060302 ( <i>E. coli</i> ) | 100 |
| L-3553_1.083c |             | 77733-77455 | 92  | Hypothetical protein                           | FJ621588; hypothetical protein, plasmid pAR060302 ( <i>E. coli</i> ) | 100 |
| L-3553_1.084c |             | 78583-77966 | 205 | Hypothetical protein                           | FJ621588; hypothetical protein, plasmid pAR060302 ( <i>E. coli</i> ) | 100 |
| L-3553_1.085c |             | 79295-78639 | 218 | Hypothetical protein                           | FJ621588; hypothetical protein, plasmid pAR060302 ( <i>E. coli</i> ) | 100 |
| L-3553_1.086c |             | 80722-79295 | 475 | Hypothetical protein                           | FJ621588; hypothetical protein, plasmid pAR060302 ( <i>E. coli</i> ) | 100 |
| L-3553_1.087c |             | 81226-80726 | 166 | Hypothetical protein                           | FJ621588; hypothetical protein, plasmid pAR060302 ( <i>E. coli</i> ) | 100 |
| L-3553_1.088c |             | 81567-81235 | 110 | Hypothetical protein                           | FJ621588; hypothetical protein, plasmid pAR060302 ( <i>E. coli</i> ) | 100 |
| L-3553_1.089c |             | 82058-81552 | 168 | Hypothetical protein                           | FJ621588; hypothetical protein, plasmid pAR060302 ( <i>E. coli</i> ) | 100 |
| L-3553_1.090c |             | 82725-82051 | 224 | Hypothetical protein                           | FJ621588; hypothetical protein, plasmid pAR060302 ( <i>E. coli</i> ) | 100 |
| L-3553_1.091c |             | 82981-82700 | 93  | Hypothetical protein                           | FJ621588; hypothetical protein, plasmid pAR060302 ( <i>E. coli</i> ) | 100 |
| L-3553_1.092c |             | 83360-82974 | 128 | Hypothetical protein                           | FJ621588; hypothetical protein, plasmid pAR060302 ( <i>E. coli</i> ) | 99  |
| L-3553_1.093  |             | 83913-84548 | 211 | Hypothetical protein                           | FJ621588; hypothetical protein, plasmid pAR060302 ( <i>E. coli</i> ) | 100 |
| L-3553_1.094c |             | 84873-84601 | 90  | Hypothetical protein                           | FJ621588; hypothetical protein, plasmid pAR060302 ( <i>E. coli</i> ) | 100 |
| L-3553_1.095c |             | 86103-84922 | 393 | Hypothetical protein                           | FJ621588; hypothetical protein, plasmid pAR060302 ( <i>E. coli</i> ) | 100 |
| L-3553_1.096c |             | 86892-86107 | 261 | Hypothetical protein                           | FJ621588; hypothetical protein, plasmid pAR060302 ( <i>E. coli</i> ) | 100 |
| L-3553_1.097c |             | 87377-87066 | 103 | Hypothetical protein                           | FJ621588; hypothetical protein, plasmid pAR060302 ( <i>E. coli</i> ) | 100 |
| L-3553_1.098  | <i>sul2</i> | 87684-88499 | 271 | Dihydropteroate synthase                       | FJ621588; Sul2, plasmid pAR060302 ( <i>E. coli</i> )                 | 100 |
| L-3553_1.099  | <i>strA</i> | 88560-89363 | 267 | Streptomycin resistance protein                | FJ621588; StrA, plasmid pAR060302 ( <i>E. coli</i> )                 | 99  |
| L-3553_1.100  | <i>strB</i> | 89369-90199 | 276 | Streptomycin resistance protein                | FJ621588; StrB, plasmid pAR060302 ( <i>E. coli</i> )                 | 100 |
| L-3553_1.101  |             | 90505-90747 | 80  | Hypothetical protein                           | FJ621588; hypothetical protein, plasmid pAR060302 ( <i>E. coli</i> ) | 99  |
| L-3553_1.102c | <i>tetR</i> | 91456-90779 | 225 | Tetracycline repressor protein                 | FJ621588; TetR, plasmid pAR060302 ( <i>E. coli</i> )                 | 100 |
| L-3553_1.103  | <i>tetA</i> | 91460-92734 | 424 | Tetracycline resistance protein                | FJ621588; TetA, plasmid pAR060302 ( <i>E. coli</i> )                 | 100 |
| L-3553_1.104c |             | 92889-92665 | 74  | Hypothetical protein                           | FJ621588; hypothetical protein, plasmid pAR060302 ( <i>E. coli</i> ) | 100 |
| L-3553_1.105c |             | 93306-93001 | 101 | Hypothetical protein                           | FJ621588; hypothetical protein, plasmid pAR060302 ( <i>E. coli</i> ) | 100 |
| L-3553_1.106c | <i>floR</i> | 94548-93334 | 404 | Chloramphenicol/florfenicol resistance protein | FJ621588; FloR, plasmid pAR060302 ( <i>E. coli</i> )                 | 99  |
| L-3553_1.107c |             | 95649-94765 | 294 | Hypothetical protein                           | FJ621588; hypothetical protein, plasmid pAR060302 ( <i>E. coli</i> ) | 100 |
| L-3553_1.108c | <i>insA</i> | 97173-95680 | 497 | Transposase                                    | FJ621588; InsA, plasmid pAR060302 ( <i>E. coli</i> )                 | 100 |
| L-3553_1.109c |             | 97608-97384 | 74  | Hypothetical protein                           | FJ621588; hypothetical protein, plasmid pAR060302 ( <i>E. coli</i> ) | 100 |
| L-3553_1.110c | <i>parA</i> | 98342-97605 | 245 | Plasmid stabilization protein, resolvase       | FJ621588; ParA, plasmid pAR060302 ( <i>E. coli</i> )                 | 100 |

|               |              |               |      |                                             |                                                                                         |     |
|---------------|--------------|---------------|------|---------------------------------------------|-----------------------------------------------------------------------------------------|-----|
| L-3553_1.111  |              | 98449-98940   | 163  | Hypothetical protein                        | FJ621588; hypothetical protein, plasmid pAR060302 ( <i>E. coli</i> )                    | 100 |
| L-3553_1.112c | <i>insB2</i> | 99690-98974   | 238  | IS26 transposase                            | FJ621588; InsB, plasmid pAR060302 ( <i>E. coli</i> )                                    | 100 |
| L-3553_1.113  | <i>insB3</i> | 100211-100933 | 240  | IS26 transposase                            | FJ621588; InsB, plasmid pAR060302 ( <i>E. coli</i> )                                    | 99  |
| L-3553_1.114c |              | 101645-101148 | 165  | Hypothetical protein                        | FJ621588; hypothetical protein, plasmid pAR060302 ( <i>E. coli</i> )                    | 100 |
| L-3553_1.115c |              | 102109-101648 | 153  | Hypothetical protein                        | FJ621588; hypothetical protein, plasmid pAR060302 ( <i>E. coli</i> )                    | 100 |
| L-3553_1.116  |              | 102233-102568 | 111  | Hypothetical protein                        | FJ621588; hypothetical protein, plasmid pAR060302 ( <i>E. coli</i> )                    | 100 |
| L-3553_1.117c |              | 103053-102583 | 156  | Hypothetical protein                        | FJ621588; hypothetical protein, plasmid pAR060302 ( <i>E. coli</i> )                    | 100 |
| L-3553_1.118c |              | 103417-103046 | 123  | Hypothetical protein                        | FJ621588; hypothetical protein, plasmid pAR060302 ( <i>E. coli</i> )                    | 100 |
| L-3553_1.119  |              | 103281-103841 | 186  | Hypothetical protein                        | FJ621588; hypothetical protein, plasmid pAR060302 ( <i>E. coli</i> )                    | 100 |
| L-3553_1.120c |              | 104511-103963 | 182  | Hypothetical protein                        | FJ621588; hypothetical protein, plasmid pAR060302 ( <i>E. coli</i> )                    | 100 |
| L-3553_1.121  |              | 104674-105024 | 116  | Hypothetical protein                        | FJ621588; hypothetical protein, plasmid pAR060302 ( <i>E. coli</i> )                    | 100 |
| L-3553_1.122  |              | 105029-105331 | 100  | Hypothetical protein                        | FJ621588; hypothetical protein, plasmid pAR060302 ( <i>E. coli</i> )                    | 99  |
| L-3553_1.123c |              | 105651-105358 | 97   | Hypothetical protein                        | FJ621588; hypothetical protein, plasmid pAR060302 ( <i>E. coli</i> )                    | 100 |
| L-3553_1.124c |              | 106011-105739 | 90   | Hypothetical protein                        | FJ621588; hypothetical protein, plasmid pAR060302 ( <i>E. coli</i> )                    | 100 |
| L-3553_1.125c |              | 106596-106069 | 175  | Hypothetical protein                        | FJ621588; hypothetical protein, plasmid pAR060302 ( <i>E. coli</i> )                    | 100 |
| L-3553_1.126c |              | 107684-106827 | 285  | Hypothetical protein                        | FJ621588; hypothetical protein, plasmid pAR060302 ( <i>E. coli</i> )                    | 100 |
| L-3553_1.127c |              | 107898-107671 | 75   | Hypothetical protein                        | FJ621588; hypothetical protein, plasmid pAR060302 ( <i>E. coli</i> )                    | 100 |
| L-3553_1.128c |              | 108419-107901 | 172  | Hypothetical protein                        | FJ621588; hypothetical protein, plasmid pAR060302 ( <i>E. coli</i> )                    | 100 |
| L-3553_1.129c |              | 108862-108416 | 148  | Hypothetical protein                        | FJ621588; hypothetical protein, plasmid pAR060302 ( <i>E. coli</i> )                    | 100 |
| L-3553_1.130c |              | 109221-108862 | 119  | Hypothetical protein                        | FJ621588; hypothetical protein, plasmid pAR060302 ( <i>E. coli</i> )                    | 100 |
| L-3553_1.131c |              | 109706-109278 | 142  | Hypothetical protein                        | FJ621588; hypothetical protein, plasmid pAR060302 ( <i>E. coli</i> )                    | 100 |
| L-3553_1.132c |              | 110600-109740 | 286  | Hypothetical protein                        | FJ621588; hypothetical protein, plasmid pAR060302 ( <i>E. coli</i> )                    | 100 |
| L-3553_1.133c |              | 111524-110616 | 302  | Peptidase S49 family protein                | FJ621588; hypothetical protein, plasmid pAR060302 ( <i>E. coli</i> )                    | 100 |
| L-3553_1.134c |              | 113393-112194 | 399  | Transposase                                 | FJ621588; hypothetical protein, plasmid pAR060302 ( <i>E. coli</i> )                    | 100 |
| L-3553_1.135  |              | 114660-115022 | 120  | Hypothetical protein                        | FJ621588; hypothetical protein, plasmid pAR060302 ( <i>E. coli</i> )                    | 100 |
| L-3553_1.136c | <i>traG</i>  | 118674-115060 | 1204 | Type IV conjugative transfer system protein | FJ621588; TraG, plasmid pAR060302 ( <i>E. coli</i> )                                    | 100 |
| L-3553_1.137c | <i>traH</i>  | 120120-118687 | 477  | Type IV conjugative transfer system protein | FJ621588; TraH, plasmid pAR060302 ( <i>E. coli</i> )                                    | 100 |
| L-3553_1.138c | <i>traF</i>  | 121150-120122 | 342  | Type IV conjugative transfer system protein | FJ621588; TraF, plasmid pAR060302 ( <i>E. coli</i> )                                    | 99  |
| L-3553_1.139c |              | 122784-121273 | 503  | UvrD/REP helicase family protein            | FJ621588; UvrD/REP helicase family protein, plasmid pAR060302 ( <i>E. coli</i> )        | 100 |
| L-3553_1.140c |              | 124111-123071 | 346  | Hypothetical protein                        | FJ621588; hypothetical protein, plasmid pAR060302 ( <i>E. coli</i> )                    | 100 |
| L-3553_1.141  | <i>insB4</i> | 125038-125754 | 238  | IS26 transposase                            | FJ621588; InsB, plasmid pAR060302 ( <i>E. coli</i> )                                    | 100 |
| L-3553_1.142c |              | 127604-125919 | 561  | Putative transport protein                  | AE006468; STM0870, Putative transport protein, <i>Salmonella</i> Typhimurium strain LT2 | 99  |

<sup>a</sup>Nucleotide no. described in AB571791



**Table S6. Core genome SNVs among serovar Typhimurium strains**

| Nucleotide position<br>on LT2 | S. Typhimurium strains |         |       |        |        |        | Information of S. Typhimurium LT2 chromosomal DNA |         |              |                                                            |
|-------------------------------|------------------------|---------|-------|--------|--------|--------|---------------------------------------------------|---------|--------------|------------------------------------------------------------|
|                               | LT2                    | T000240 | DT104 | 140285 | L-3553 | SL1344 | D23580                                            | Gene-ID | Gene         | Function of products                                       |
| 140                           | A                      | C       | A     | A      | A      | A      | A                                                 |         |              |                                                            |
| 831                           | T                      | T       | C     | C      | C      | C      | C                                                 | STM0002 | <i>thrA</i>  | bifunctional aspartokinase I/homoserine dehydrogenase I    |
| 5129                          | T                      | T       | T     | T      | T      | T      | C                                                 | STM0005 | <i>yaaA</i>  | hypothetical protein                                       |
| 9724                          | A                      | A       | G     | A      | A      | A      | A                                                 | STM0009 | <i>yaaH</i>  | hypothetical protein                                       |
| 12366                         | C                      | C       | C     | C      | C      | T      | C                                                 | STM0012 | <i>dnaK</i>  | molecular chaperone DnaK                                   |
| 13723                         | C                      | C       | C     | C      | C      | C      | T                                                 | STM0013 | <i>dnaJ</i>  | chaperone protein DnaJ                                     |
| 15716                         | A                      | A       | A     | A      | A      | A      | G                                                 | STM0014 | -            | putative transcriptional regulator                         |
| 15775                         | T                      | T       | G     | G      | G      | G      | G                                                 | STM0014 | -            | putative transcriptional regulator                         |
| 15949                         | C                      | C       | C     | C      | C      | C      | T                                                 | STM0014 | -            | putative transcriptional regulator                         |
| 17435                         | C                      | C       | C     | T      | C      | C      | C                                                 | STM0017 | -            | hypothetical protein                                       |
| 20011                         | C                      | C       | C     | T      | T      | T      | T                                                 |         |              |                                                            |
| 23058                         | C                      | C       | C     | C      | C      | A      | C                                                 |         |              |                                                            |
| 23156                         | A                      | A       | G     | G      | G      | G      | G                                                 |         |              |                                                            |
| 25548                         | T                      | T       | T     | T      | T      | A      | T                                                 | STM0022 | <i>bcbB</i>  | fimbrial chaparone                                         |
| 25722                         | C                      | C       | T     | C      | C      | C      | C                                                 | STM0022 | <i>bcbB</i>  | fimbrial chaparone                                         |
| 27184                         | C                      | C       | T     | C      | C      | C      | C                                                 | STM0023 | <i>bcbC</i>  | fimbrial usher                                             |
| 29155                         | A                      | A       | G     | A      | A      | A      | A                                                 | STM0024 | <i>bcbD</i>  | fimbrial subunit                                           |
| 30693                         | C                      | C       | T     | C      | C      | C      | C                                                 | STM0027 | <i>bcbG</i>  | fimbrial chaparone                                         |
| 31305                         | T                      | T       | T     | T      | T      | T      | A                                                 | STM0028 | <i>bcbH</i>  | putative thiol-disulfide isomerase                         |
| 34090                         | G                      | G       | T     | G      | G      | G      | G                                                 | STM0030 | -            | putative transcriptional regulator                         |
| 34091                         | A                      | A       | G     | G      | G      | G      | G                                                 | STM0030 | -            | putative transcriptional regulator                         |
| 34754                         | C                      | G       | G     | G      | G      | G      | G                                                 | STM0031 | -            | putative transcriptional regulator                         |
| 35844                         | A                      | A       | G     | A      | A      | A      | A                                                 | STM0032 | -            | putative arylsulfatase                                     |
| 35965                         | A                      | A       | G     | G      | G      | G      | G                                                 | STM0032 | -            | putative arylsulfatase                                     |
| 36413                         | G                      | G       | C     | G      | G      | G      | A                                                 | STM0032 | -            | putative arylsulfatase                                     |
| 37175                         | C                      | C       | C     | C      | C      | T      | C                                                 | STM0033 | -            | putative 5'-nucleotidase                                   |
| 37797                         | T                      | T       | T     | T      | C      | T      | T                                                 | STM0033 | -            | putative 5'-nucleotidase                                   |
| 39957                         | G                      | G       | A     | G      | G      | G      | G                                                 |         |              |                                                            |
| 43331                         | A                      | A       | A     | A      | A      | T      | A                                                 | STM0037 | -            | putative cytoplasmic protein                               |
| 43577                         | G                      | G       | A     | G      | G      | G      | G                                                 | STM0037 | -            | putative cytoplasmic protein                               |
| 45126                         | G                      | G       | G     | G      | G      | G      | A                                                 | STM0038 | -            | putative arylsulfatase                                     |
| 47955                         | C                      | C       | T     | C      | C      | C      | C                                                 | STM0040 | <i>nhaR</i>  | transcriptional activator NhaR                             |
| 51973                         | C                      | C       | C     | C      | T      | C      | C                                                 |         |              |                                                            |
| 54863                         | G                      | G       | G     | G      | G      | A      | G                                                 | STM0046 | <i>ileS</i>  | isoleucyl-tRNA synthetase                                  |
| 57550                         | C                      | C       | T     | C      | C      | C      | C                                                 | STM0048 | <i>slpA</i>  | FKBP-type peptidyl-prolyl cis-trans isomerase              |
| 63253                         | G                      | G       | G     | A      | A      | A      | A                                                 | STM0053 | -            | putative transcriptional regulator                         |
| 68394                         | A                      | A       | T     | A      | A      | A      | A                                                 |         |              |                                                            |
| 70089                         | G                      | G       | G     | A      | A      | A      | A                                                 | STM0060 | <i>citE2</i> | putative citrate lyase beta chain                          |
| 71394                         | C                      | C       | C     | C      | C      | C      | T                                                 | STM0061 | <i>citF2</i> | putative citrate lyase alpha chain/citrate-ACP transferase |
| 74584                         | G                      | G       | G     | G      | T      | G      | G                                                 | STM0064 | <i>dapB</i>  | dihydrodipicolinate reductase                              |
| 75382                         | G                      | G       | G     | G      | G      | G      | T                                                 |         |              |                                                            |
| 75491                         | C                      | C       | C     | C      | C      | C      | T                                                 |         |              |                                                            |
| 75586                         | A                      | A       | G     | A      | A      | A      | A                                                 |         |              |                                                            |
| 75854                         | T                      | T       | T     | T      | T      | T      | C                                                 |         |              |                                                            |
| 75868                         | C                      | C       | C     | C      | C      | T      | C                                                 |         |              |                                                            |
| 77150                         | A                      | A       | A     | A      | G      | A      | A                                                 | STM0067 | <i>carB</i>  | carbamoyl phosphate synthase large subunit                 |
| 77382                         | C                      | C       | C     | C      | C      | T      | C                                                 | STM0067 | <i>carB</i>  | carbamoyl phosphate synthase large subunit                 |
| 80521                         | A                      | A       | A     | A      | A      | G      | A                                                 |         |              |                                                            |
| 84502                         | C                      | C       | C     | C      | C      | T      | C                                                 | STM0072 | <i>caiB</i>  | crotonobetainyl-CoA:carnitine CoA-transferase              |
| 87074                         | T                      | T       | T     | C      | C      | C      | C                                                 | STM0074 | <i>caiT</i>  | L-carnitine/gamma-butyrobetaine antiporter                 |
| 88361                         | C                      | C       | C     | C      | C      | T      | C                                                 |         |              |                                                            |
| 88843                         | G                      | G       | A     | G      | G      | G      | G                                                 | STM0075 | <i>fixA</i>  | putative electron transfer flavoprotein FixA               |
| 89080                         | C                      | C       | C     | C      | T      | C      | C                                                 | STM0075 | <i>fixA</i>  | putative electron transfer flavoprotein FixA               |
| 91041                         | T                      | T       | C     | C      | C      | C      | C                                                 | STM0077 | <i>fixC</i>  | putative oxidoreductase FixC                               |
| 91336                         | G                      | G       | G     | G      | G      | A      | G                                                 | STM0077 | <i>fixC</i>  | putative oxidoreductase FixC                               |
| 94927                         | C                      | T       | C     | C      | C      | C      | C                                                 | STM0082 | -            | putative secreted protein                                  |
| 98144                         | G                      | G       | A     | G      | G      | G      | G                                                 |         |              |                                                            |
| 99551                         | T                      | T       | T     | T      | T      | G      | T                                                 | STM0086 | <i>kefC</i>  | glutathione-regulated potassium-efflux system protein KefC |
| 101101                        | C                      | C       | C     | C      | C      | T      | C                                                 | STM0087 | <i>folA</i>  | dihydrofolate reductase                                    |
| 103018                        | T                      | T       | G     | G      | G      | G      | G                                                 | STM0090 | <i>ksgA</i>  | dimethyladenosine transferase                              |
| 104421                        | C                      | C       | A     | A      | A      | A      | A                                                 | STM0091 | <i>pdxA</i>  | 4-hydroxythreonine-4-phosphate dehydrogenase               |
| 105132                        | C                      | C       | C     | C      | C      | A      | T                                                 | STM0092 | <i>surA</i>  | peptidyl-prolyl cis-trans isomerase SurA                   |
| 107231                        | A                      | A       | A     | T      | T      | T      | T                                                 | STM0093 | <i>imp</i>   | organic solvent tolerance protein                          |
| 109555                        | C                      | C       | G     | C      | C      | C      | C                                                 | STM0095 | <i>rluA</i>  | 23S rRNA/tRNA pseudouridine synthase A                     |
| 114441                        | G                      | G       | G     | G      | G      | G      | A                                                 | STM0097 | <i>polB</i>  | DNA polymerase II                                          |
| 114465                        | C                      | C       | C     | C      | C      | C      | T                                                 | STM0097 | <i>polB</i>  | DNA polymerase II                                          |
| 117658                        | G                      | G       | A     | G      | G      | G      | G                                                 | STM0101 | <i>araD</i>  | L-ribulose-5-phosphate 4-epimerase                         |
| 120742                        | C                      | C       | T     | C      | C      | C      | C                                                 | STM0103 | <i>araB</i>  | ribulokinase                                               |
| 120876                        | C                      | C       | T     | C      | C      | C      | C                                                 | STM0103 | <i>araB</i>  | ribulokinase                                               |
| 123364                        | G                      | G       | G     | A      | A      | A      | A                                                 | STM0105 | <i>yabI</i>  | hypothetical protein                                       |
| 127292                        | G                      | G       | G     | G      | G      | A      | G                                                 | STM0109 | <i>yabN</i>  | transcriptional regulator SgrR                             |
| 127747                        | T                      | T       | C     | C      | C      | C      | C                                                 | STM0109 | <i>yabN</i>  | transcriptional regulator SgrR                             |
| 127898                        | G                      | G       | A     | G      | G      | G      | G                                                 | STM0109 | <i>yabN</i>  | transcriptional regulator SgrR                             |
| 134492                        | A                      | A       | A     | A      | A      | C      | A                                                 |         |              |                                                            |
| 135868                        | T                      | T       | C     | C      | C      | C      | C                                                 |         |              |                                                            |
| 136572                        | G                      | G       | G     | A      | G      | G      | G                                                 | STM0116 | <i>ilvI</i>  | acetolactate synthase 3 catalytic subunit                  |
| 141192                        | A                      | A       | A     | A      | A      | A      | G                                                 | STM0120 | <i>mraW</i>  | S-adenosyl-methyltransferase MraW                          |

|        |   |   |   |   |   |   |   |
|--------|---|---|---|---|---|---|---|
| 141965 | T | T | T | C | T | T | T |
| 142471 | A | A | G | A | A | A | A |
| 144008 | C | C | C | T | C | C | C |
| 144474 | C | C | C | C | C | C | T |
| 153434 | C | C | C | C | G | C | C |
| 153820 | C | C | C | C | C | T | C |
| 154974 | C | C | A | C | C | C | C |
| 161385 | C | C | T | C | C | C | C |
| 162621 | T | T | T | T | T | C | T |
| 166348 | A | G | G | G | G | G | G |
| 168062 | G | G | A | G | G | G | G |
| 169825 | A | A | G | G | G | G | G |
| 171840 | G | G | G | G | G | G | A |
| 172583 | C | C | C | T | C | C | C |
| 174483 | C | C | C | C | C | C | T |
| 177553 | A | A | G | G | G | G | G |
| 180034 | C | G | G | G | G | G | G |
| 180035 | G | C | C | C | C | C | C |
| 182695 | G | G | G | G | T | G | G |
| 184305 | C | G | G | G | G | G | G |
| 184306 | G | C | C | C | C | C | C |
| 185256 | A | A | G | G | G | G | G |
| 185381 | G | G | A | G | G | G | G |
| 186678 | C | A | C | C | C | C | C |
| 188939 | A | A | A | A | C | A | A |
| 192226 | A | T | T | T | T | T | T |
| 193186 | A | A | A | A | A | A | G |
| 193606 | C | C | T | C | C | C | C |
| 194733 | T | T | T | T | T | T | C |
| 198181 | C | C | C | C | C | C | T |
| 198539 | G | G | G | A | G | G | G |
| 203177 | T | T | T | G | G | G | G |
| 206940 | T | T | T | T | T | T | C |
| 208395 | C | C | C | C | C | C | T |
| 208858 | A | A | A | A | T | A | A |
| 211778 | C | C | C | C | C | C | T |
| 212139 | C | T | C | C | C | C | C |
| 212766 | G | G | G | G | G | G | A |
| 215515 | C | C | C | C | C | T | C |
| 217153 | G | G | A | G | G | G | G |
| 218047 | C | C | C | C | C | C | A |
| 218107 | C | C | C | C | C | A | C |
| 218109 | C | C | T | C | C | C | C |
| 224363 | C | C | T | C | C | C | C |
| 226287 | A | A | A | A | A | A | G |
| 228054 | C | C | C | T | T | T | T |
| 229972 | C | C | A | A | A | A | A |
| 230364 | G | G | T | G | G | G | G |
| 230402 | G | G | G | G | G | G | A |
| 233282 | C | C | C | C | C | C | A |
| 233671 | G | G | G | G | G | G | T |
| 240045 | A | A | C | C | C | C | C |
| 241385 | C | C | T | C | C | C | C |
| 247979 | G | G | G | G | G | T | G |
| 250053 | C | C | C | G | C | C | C |
| 252714 | G | G | G | G | T | G | G |
| 253595 | G | G | G | G | G | G | A |
| 255291 | T | T | T | A | A | A | A |
| 255727 | G | G | G | G | G | G | A |
| 257179 | T | T | C | T | T | T | T |
| 260965 | G | G | G | G | G | G | A |
| 264106 | G | G | G | A | A | A | A |
| 271617 | G | G | G | G | G | G | A |
| 272969 | G | G | G | G | G | A | G |
| 274981 | C | C | C | C | C | C | T |
| 277017 | C | C | C | T | C | C | C |
| 277971 | G | G | A | G | G | G | G |
| 282230 | A | A | G | A | A | A | A |
| 284164 | G | G | G | G | G | G | C |
| 285510 | A | A | G | A | A | A | A |
| 286024 | G | G | G | G | A | G | G |
| 286834 | A | A | A | G | A | A | A |
| 288835 | C | T | T | T | T | T | T |
| 288843 | C | A | A | A | A | A | A |
| 288853 | C | T | T | T | T | T | T |
| 290875 | C | C | T | C | C | C | C |
| 294788 | T | C | T | T | T | T | T |
| 295760 | G | G | A | A | A | A | A |
| 296614 | C | C | C | C | C | C | T |
| 297120 | T | C | T | T | T | T | T |
| 299197 | C | C | C | C | C | T | C |

|         |             |                                                                   |
|---------|-------------|-------------------------------------------------------------------|
| STM0122 | <i>ftsI</i> | division specific transpeptidase                                  |
| STM0122 | <i>ftsI</i> | division specific transpeptidase                                  |
| STM0123 | <i>murE</i> | UDP-N-acetylmuramoylalanyl-D-glutamate--2,6-diaminopimelate       |
| STM0123 | <i>murE</i> | UDP-N-acetylmuramoylalanyl-D-glutamate--2,6-diaminopimelate       |
| STM0130 | <i>ddl</i>  | D-alanine--D-alanine ligase                                       |
| STM0131 | <i>ftsQ</i> | cell division protein FtsQ                                        |
| STM0132 | <i>ftsA</i> | cell division protein FtsA                                        |
| STM0136 | <i>secA</i> | preprotein translocase subunit SecA                               |
| STM0139 | <i>yacF</i> | hypothetical protein                                              |
| STM0143 | <i>hofB</i> | hypothetical protein                                              |
| STM0144 | <i>ppdD</i> | putative major pilin subunit                                      |
| STM0146 | <i>ampD</i> | N-acetyl-anhydromuranmyl-L-alanine amidase                        |
| STM0149 | -           | Na+/galactoside symporter                                         |
| STM0149 | -           | Na+/galactoside symporter                                         |
| STM0150 | <i>aroP</i> | aromatic amino acid transporter                                   |
| STM0152 | <i>aceE</i> | pyruvate dehydrogenase subunit E1                                 |
| STM0153 | <i>aceF</i> | dihydropolipoamide acetyltransferase                              |
| STM0153 | <i>aceF</i> | dihydropolipoamide acetyltransferase                              |
| STM0157 | <i>yacH</i> | putative outer membrane protein                                   |
| STM0157 | <i>yacH</i> | putative outer membrane protein                                   |
| STM0157 | <i>yacH</i> | putative outer membrane protein                                   |
| STM0157 | <i>yacH</i> | putative outer membrane protein                                   |
| STM0158 | <i>acnB</i> | bifunctional aconitate hydratase 2/2-methylisocitrate dehydratase |
| STM0159 | -           | putative restriction endonuclease                                 |
| STM0162 | -           | putative inner membrane protein                                   |
| STM0163 | <i>pdxA</i> | 4-hydroxythreonine-4-phosphate dehydrogenase 2                    |
| STM0164 | -           | putative transcriptional regulator                                |
| STM0165 | <i>speD</i> | 5-adenosylmethionine decarboxylase                                |
| STM0169 | <i>gcd</i>  | glucose dehydrogenase                                             |
| STM0173 | <i>yadH</i> | putative transport protein                                        |
| STM0175 | <i>sttC</i> | putative fimbrial usher                                           |
| STM0177 | <i>stiA</i> | putative fimbrial subunit                                         |
| STM0177 | <i>stiA</i> | putative fimbrial subunit                                         |
| STM0181 | <i>panC</i> | pantoate--beta-alanine ligase                                     |
| STM0181 | <i>panC</i> | pantoate--beta-alanine ligase                                     |
| STM0182 | <i>panB</i> | 3-methyl-2-oxobutanoate hydroxymethyltransferase                  |
| STM0185 | <i>yadB</i> | glutamyl-Q tRNA(Asp) synthetase                                   |
| STM0187 | <i>sfsA</i> | sugar fermentation stimulation protein A                          |
| STM0188 | <i>ligT</i> | 2'-5' RNA ligase                                                  |
| STM0188 | <i>ligT</i> | 2'-5' RNA ligase                                                  |
| STM0188 | <i>ligT</i> | 2'-5' RNA ligase                                                  |
| STM0191 | <i>fhuA</i> | ferrichrome outer membrane transporter                            |
| STM0192 | <i>fhuC</i> | iron-hydroxamate transporter ATP-binding subunit                  |
| STM0194 | <i>fhuB</i> | iron-hydroxamate transporter permease subunit                     |
| STM0196 | <i>stfC</i> | putative fimbrial outer membrane usher                            |
| STM0196 | <i>stfC</i> | putative fimbrial outer membrane usher                            |
| STM0203 | <i>yadQ</i> | chloride channel protein                                          |
| STM0206 | <i>btuF</i> | vitamin B12-transporter protein BtuF                              |
| STM0212 | -           | putative inner membrane protein                                   |
| STM0213 | <i>dapD</i> | 2,3,4,5-tetrahydropyridine-2,6-carboxylate N-succinyltransferase  |
| STM0214 | <i>glnD</i> | PII uridylyl-transferase                                          |
| STM0215 | <i>map</i>  | methionine aminopeptidase                                         |
| STM0217 | <i>tsf</i>  | elongation factor Ts                                              |
| STM0217 | <i>tsf</i>  | elongation factor Ts                                              |
| STM0219 | <i>frr</i>  | ribosome recycling factor                                         |
| STM0222 | <i>cdsA</i> | CDP-diglyceride synthase                                          |
| STM0224 | <i>yaeT</i> | outer membrane protein assembly factor YaeT                       |
| STM0231 | <i>dnaE</i> | DNA polymerase III subunit alpha                                  |
| STM0231 | <i>dnaE</i> | DNA polymerase III subunit alpha                                  |
| STM0233 | -           | putative endochitinase                                            |
| STM0234 | <i>ldcC</i> | lysine decarboxylase 2                                            |
| STM0234 | <i>ldcC</i> | lysine decarboxylase 2                                            |
| STM0242 | <i>proS</i> | prolyl-tRNA synthetase                                            |
| STM0245 | <i>metQ</i> | DL-methionine transporter substrate-binding subunit               |
| STM0246 | <i>yaeE</i> | DL-methionine transporter permease subunit                        |
| STM0255 | <i>dkgB</i> | 2,5-diketo-D-gluconate reductase B                                |
| STM0256 | <i>yafC</i> | putative transcriptional regulator                                |
| STM0257 | -           | putative drug efflux protein                                      |
| STM0259 | <i>yafE</i> | putative methyltransferase                                        |

|        |   |   |   |   |   |   |   |           |             |                                                             |
|--------|---|---|---|---|---|---|---|-----------|-------------|-------------------------------------------------------------|
| 302642 | C | C | C | C | C | C | T | STM0262   | <i>yafS</i> | putative SAM-dependent methyltransferase                    |
| 307524 | C | A | C | C | C | C | C | STM0268   | -           | putative cytoplasmic protein                                |
| 307628 | A | A | A | G | G | G | G | STM0268   | -           | putative cytoplasmic protein                                |
| 309248 | G | G | G | G | T | G | G | STM0270   | -           | putative cytoplasmic protein                                |
| 309918 | A | A | A | A | A | A | G | STM0270   | -           | putative cytoplasmic protein                                |
| 311694 | C | T | C | C | C | C | C | STM0272   | -           | putative chaperone ATPase                                   |
| 312123 | C | C | C | C | C | T | C | STM0272   | -           | putative chaperone ATPase                                   |
| 321819 | C | C | C | C | C | C | T | STM0282   | -           | hypothetical protein                                        |
| 323629 | C | C | C | C | C | C | T | STM0284   | -           | putative Shiga-like toxin A subunit                         |
| 325108 | C | C | C | A | C | C | C | STM0285   | -           | putative inner membrane protein                             |
| 327384 | T | T | C | C | C | C | C | STM0285   | -           | putative inner membrane protein                             |
| 328323 | A | A | G | A | A | A | A | STM0286   | -           | putative cytoplasmic protein                                |
| 331388 | T | T | T | A | A | A | A | STM0289   | -           | putative cytoplasmic protein                                |
| 332322 | A | A | T | A | A | A | A | STM0290   | -           | putative cytoplasmic protein                                |
| 338965 | A | A | C | A | A | A | A | STM0294   | -           | putative cytoplasmic protein                                |
| 338966 | A | A | C | A | A | A | A | STM0294   | -           | putative cytoplasmic protein                                |
| 341734 | C | C | C | T | T | T | T |           |             |                                                             |
| 341796 | T | T | C | C | C | C | C |           |             |                                                             |
| 343179 | A | A | A | A | C | A | A | STM0300   | <i>safB</i> | putative fimbrial assembly chaparone                        |
| 347857 | T | T | T | T | T | T | G |           |             |                                                             |
| 348452 | C | C | T | C | C | C | C |           |             |                                                             |
| 348964 | G | G | A | G | G | G | G | STM0304   | <i>sinR</i> | transcriptional regulator                                   |
| 357736 | G | G | G | G | G | G | T |           |             |                                                             |
| 359602 | A | A | G | G | G | G | G |           |             |                                                             |
| 359640 | C | C | C | C | C | C | T |           |             |                                                             |
| 360185 | C | C | C | C | C | T | C |           |             |                                                             |
| 361434 | G | G | G | G | G | G | A | STM0316   | <i>pepD</i> | aminoacyl-histidine dipeptidase                             |
| 366668 | C | C | C | C | C | C | A | STM0321   | <i>proB</i> | gamma-glutamyl kinase                                       |
| 368985 | A | A | A | A | G | A | A |           |             |                                                             |
| 373986 | G | G | G | G | G | A | G |           |             |                                                             |
| 374185 | A | A | A | A | A | A | A | STM0329   | -           | isopropylmalate isomerase large subunit                     |
| 375965 | C | C | T | C | C | C | C | STM0329   | -           | isopropylmalate isomerase large subunit                     |
| 377350 | C | C | T | C | C | C | C | STM0332   | -           | putative hydrolase/acyltransferase                          |
| 378430 | T | T | T | T | T | T | C | STM0333   | -           | putative transcriptional regulator                          |
| 378729 | T | T | G | T | T | T | T | STM0335   | -           | putative outer membrane protein                             |
| 379060 | C | C | T | T | T | T | T | STM0336   | <i>stbE</i> | putative fimbrial chaparone                                 |
| 382202 | C | C | C | C | T | C | C | STM0338   | <i>stbC</i> | putative fimbrial usher                                     |
| 383521 | C | C | C | T | T | T | T | STM0338   | <i>stbC</i> | putative fimbrial usher                                     |
| 389638 | C | C | C | C | T | C | C | STM0345   | -           | putative inner membrane protein                             |
| 389715 | T | T | C | C | C | C | C | STM0345   | -           | putative inner membrane protein                             |
| 390850 | G | G | G | A | A | A | A | STM0346   | -           | putative outer membrane protein                             |
| 391264 | T | T | T | T | G | T | T | STM0347   | -           | putative response regulator                                 |
| 406693 | T | T | C | C | C | C | C | STM0358.S | <i>res</i>  | DNA restriction enzyme                                      |
| 409770 | G | G | G | G | G | G | A | STM0360   | -           | cytochrome BD2 subunit I                                    |
| 410832 | C | C | C | T | C | C | C | STM0361   | -           | cytochrome BD2 subunit II                                   |
| 413408 | C | C | T | T | T | T | T | STM0364   | <i>foxA</i> | ferrioxamine receptor                                       |
| 415588 | T | T | C | C | C | C | C |           |             |                                                             |
| 417611 | C | C | T | C | C | C | C | STM0367   | <i>prpR</i> | prp operon regulator                                        |
| 417746 | G | G | G | G | A | G | G |           |             |                                                             |
| 418594 | A | A | G | G | G | G | G | STM0368   | <i>prpB</i> | 2-methylisocitrate lyase                                    |
| 423502 | C | C | C | G | C | C | C | STM0371   | <i>prpE</i> | propionyl-CoA synthetase                                    |
| 425938 | G | G | A | G | G | G | G | STM0373   | <i>yaiU</i> | flagellar protein                                           |
| 428839 | C | C | A | C | C | C | C |           |             |                                                             |
| 430479 | G | G | G | G | G | G | A | STM0376   | <i>sbmA</i> | transport protein                                           |
| 433146 | G | G | G | G | G | A | G |           |             |                                                             |
| 434816 | C | C | C | C | C | T | C | STM0381   | -           | putative inner membrane protein                             |
| 436647 | C | C | C | C | T | C | C | STM0382   | -           | putative permease                                           |
| 439885 | C | C | C | T | C | C | C | STM0386   | <i>proC</i> | pyrroline-5-carboxylate reductase                           |
| 441538 | T | T | T | C | T | T | T | STM0389   | <i>yaiA</i> | hypothetical protein                                        |
| 442992 | G | G | G | G | G | G | A | STM0392   | <i>rdgC</i> | recombination associated protein                            |
| 444469 | G | G | G | G | G | T | G | STM0393   | <i>yajF</i> | fructokinase                                                |
| 445700 | C | C | C | C | C | C | A | STM0394   | <i>araJ</i> | MFS transport protein AraJ                                  |
| 446646 | C | C | C | T | C | C | C | STM0395   | <i>sbcC</i> | exonuclease subunit SbcC                                    |
| 447744 | G | G | T | G | G | G | G | STM0395   | <i>sbcC</i> | exonuclease subunit SbcC                                    |
| 450071 | C | C | C | T | T | T | T | STM0396   | <i>sbcD</i> | exonuclease subunit SbcD                                    |
| 453047 | C | C | C | T | T | T | T |           |             |                                                             |
| 459592 | C | C | C | T | C | C | C | STM0404   | <i>queA</i> | S-adenosylmethionine:tRNA ribosyltransferase-isomerase      |
| 462747 | A | A | G | G | G | G | G | STM0407   | <i>secD</i> | preprotein translocase subunit SecD                         |
| 462946 | A | A | T | A | A | A | A | STM0407   | <i>secD</i> | preprotein translocase subunit SecD                         |
| 463791 | A | A | G | G | G | G | G | STM0407   | <i>secD</i> | preprotein translocase subunit SecD                         |
| 464454 | G | A | G | G | G | G | G | STM0408   | <i>secF</i> | preprotein translocase subunit SecF                         |
| 470791 | A | A | A | A | A | A | G | STM0416   | <i>ribD</i> | deaminase/5-amino-6-(5-phosphoribosylamino)uracil reductase |
| 475569 | G | G | G | G | G | G | T | STM0422   | <i>dxs</i>  | 1-deoxy-D-xylulose-5-phosphate synthase                     |
| 477023 | C | C | C | C | C | C | A | STM0423   | <i>ispA</i> | geranyltransferase                                          |
| 479087 | A | A | A | A | A | G | A | STM0425   | <i>thil</i> | thiamine biosynthesis protein Thil                          |
| 482756 | C | C | C | C | C | A | C | STM0429   | <i>phnS</i> | 2-aminoethylphosphonate transporter                         |
| 484902 | G | G | G | G | A | G | G | STM0431   | <i>phnW</i> | 2-aminoethylphosphonate--pyruvate transaminase              |
| 486041 | G | T | G | G | G | G | G | STM0432   | <i>phnX</i> | phosphonoacetaldehyde hydrolase                             |
| 489592 | T | T | T | T | T | T | A | STM0436.S | <i>yajR</i> | putative transport protein                                  |
| 490461 | A | A | A | A | A | A | G | STM0437   | -           | putative periplasmic protein                                |



|        |   |   |   |   |   |   |   |           |             |                                                       |
|--------|---|---|---|---|---|---|---|-----------|-------------|-------------------------------------------------------|
| 658249 | A | A | A | A | A | A | G | STM0596   | <i>entE</i> | enterobactin synthase subunit E                       |
| 659315 | C | C | C | C | C | C | T | STM0597   | <i>entB</i> | 2,3-dihydro-2,3-dihydroxybenzoate synthetase          |
| 660265 | T | T | G | G | G | G | G | STM0598   | <i>entA</i> | 2,3-dihydroxybenzoate-2,3-dehydrogenase               |
| 660389 | T | T | C | C | C | C | C | STM0598   | <i>entA</i> | 2,3-dihydroxybenzoate-2,3-dehydrogenase               |
| 662642 | A | A | A | A | A | A | A | STM0600   | <i>cstA</i> | carbon starvation protein                             |
| 663064 | T | T | C | C | C | C | C | STM0600   | <i>cstA</i> | carbon starvation protein                             |
| 668815 | G | G | G | G | G | G | A | STM0606   | <i>ybdO</i> | putative transcriptional regulator                    |
| 669418 | C | C | T | C | C | C | C | STM0607   | <i>dsbG</i> | disulfide isomerase/thiol-disulfide oxidase           |
| 669477 | C | C | C | C | C | T | C | STM0607   | <i>dsbG</i> | disulfide isomerase/thiol-disulfide oxidase           |
| 672108 | C | C | C | A | A | A | A | STM0609   | <i>ahpF</i> | alkyl hydroperoxide reductase F52a subunit            |
| 672516 | T | T | T | C | C | C | C | STM0609   | <i>ahpF</i> | alkyl hydroperoxide reductase F52a subunit            |
| 675623 | G | G | G | G | G | G | A | STM0611   | -           | putative oxidoreductase protein                       |
| 683010 | G | G | G | T | G | G | G | STM0619   | <i>citG</i> | triphosphoribosyl-dephospho-CoA synthase              |
| 685310 | T | T | T | T | T | G | T | STM0621   | <i>citF</i> | citrate lyase alpha chain/citrate-ACP transferase     |
| 686421 | A | A | A | T | A | A | A | STM0623   | <i>citD</i> | citrate lyase subunit gamma                           |
| 691291 | C | C | T | C | C | C | C | STM0627   | <i>dcuC</i> | C4-dicarboxylate transporter DcuC                     |
| 693928 | G | G | A | G | G | G | G | STM0631   | <i>ybeM</i> | putative hydrolase                                    |
| 695456 | G | G | A | G | G | G | G | STM0633   | <i>lipA</i> | lipoyl synthase                                       |
| 700109 | C | C | C | C | C | A | C | STM0638   | <i>rlpA</i> | rare lipoprotein A                                    |
| 702031 | C | C | C | C | T | C | C | STM0640   | <i>mrdA</i> | penicillin-binding protein 2                          |
| 703633 | C | C | T | C | C | C | C | STM0640   | <i>mrdA</i> | penicillin-binding protein 2                          |
| 706762 | C | C | C | C | T | C | C | STM0644   | <i>cobD</i> | threonine-phosphate decarboxylase                     |
| 708149 | G | G | G | T | T | T | T | STM0646   | <i>holA</i> | DNA polymerase III subunit delta                      |
| 708828 | T | T | C | T | T | T | T | STM0647   | <i>rlpB</i> | LPS-assembly lipoprotein RlpB                         |
| 709871 | C | C | T | C | C | C | C | STM0648   | <i>leuS</i> | leucyl-tRNA synthetase                                |
| 716263 | T | T | T | T | T | T | G | STM0652   | -           | putative sigma-54 dependent transcriptional regulator |
| 717867 | C | C | T | C | C | C | C | STM0654   | <i>ybeQ</i> | TPR repeat-containing protein                         |
| 719621 | A | A | C | C | C | C | C | STM0656   | <i>ybeS</i> | putative molecular chaperone                          |
| 721438 | C | C | A | C | C | C | C | STM0658   | <i>ybeV</i> | putative molecular chaperone                          |
| 723890 | T | C | T | T | T | T | T | STM0659   | <i>hscC</i> | putative heatshock protein                            |
| 723896 | G | A | G | G | G | G | G | STM0659   | <i>hscC</i> | putative heatshock protein                            |
| 725796 | C | C | C | C | T | C | C | STM0661   | <i>rihA</i> | ribonucleoside hydrolase 1                            |
| 727059 | A | A | C | A | A | A | A | STM0662   | <i>gltL</i> | glutamate/aspartate transporter                       |
| 729093 | T | T | T | G | G | G | G | STM0665   | <i>gltI</i> | glutamate and aspartate transporter subunit           |
| 731355 | G | G | G | G | G | G | T | STM0666   | <i>Int</i>  | apolipoprotein N-acyltransferase                      |
| 733520 | A | A | G | A | A | A | A | STM0669   | <i>phoL</i> | putative phosphate starvation-inducible protein       |
| 734482 | C | C | C | T | T | T | T |           |             |                                                       |
| 740118 | C | C | T | C | C | C | C |           |             |                                                       |
| 745011 | C | C | C | C | C | C | T |           |             |                                                       |
| 748711 | A | A | A | A | A | G | A | STM0680   | <i>asnB</i> | asparagine synthetase B                               |
| 754091 | G | G | T | G | G | G | G |           |             |                                                       |
| 755687 | C | C | C | C | C | T | C | STM0686   | <i>glnS</i> | glutamyl-tRNA synthetase                              |
| 757823 | G | G | G | A | A | A | A | STM0691   | -           | tricarballoylate dehydrogenase                        |
| 764175 | C | C | C | T | C | C | C | STM0692   | -           | putative transcriptional regulator                    |
| 765034 | G | G | G | G | A | G | G | STM0695   | <i>ybfE</i> | LexA regulated protein                                |
| 766222 | G | G | A | A | A | A | A | STM0701   | <i>speF</i> | ornithine decarboxylase                               |
| 767823 | C | C | C | C | C | T | C | STM0701   | <i>speF</i> | ornithine decarboxylase                               |
| 768637 | T | T | T | T | C | T | T | STM0703   | <i>kdpD</i> | sensor protein KdpD                                   |
| 771212 | A | A | A | A | A | G | A | STM0703   | <i>kdpD</i> | sensor protein KdpD                                   |
| 772524 | G | G | G | G | A | G | G | STM0705   | <i>kdpB</i> | potassium-transporting ATPase subunit B               |
| 773204 | A | A | G | G | G | G | G | STM0706   | <i>kdpA</i> | potassium-transporting ATPase subunit A               |
| 776378 | C | C | C | C | T | A | C | STM0706   | <i>kdpA</i> | potassium-transporting ATPase subunit A               |
| 776965 | G | G | G | G | G | T | G | STM0710   | <i>ybgH</i> | POT family transport protein                          |
| 778611 | T | T | T | T | T | T | C | STM0710   | <i>ybgH</i> | POT family transport protein                          |
| 779768 | A | A | A | T | T | T | T | STM0711   | <i>ybgI</i> | putative hydrolase-oxidase                            |
| 784495 | G | G | G | G | G | A | G | STM0713   | <i>ybgK</i> | putative carboxylase                                  |
| 791144 | A | A | A | G | A | A | A | STM0719   | -           | putative UDP-galactopyranose mutase                   |
| 795023 | T | T | C | T | T | T | T | STM0725   | -           | putative glycosyltransferase                          |
| 797195 | T | T | C | C | C | C | C | STM0729   | <i>abrB</i> | putative transport protein                            |
| 799240 | G | G | G | G | G | G | T | STM0730   | <i>gltA</i> | type II citrate synthase                              |
| 801427 | A | A | A | A | G | A | A | STM0734   | <i>sdhA</i> | succinate dehydrogenase flavoprotein subunit          |
| 803994 | G | G | A | G | G | G | G |           |             |                                                       |
| 806380 | C | C | C | C | C | T | C | STM0736   | <i>sucA</i> | 2-oxoglutarate dehydrogenase E1 component             |
| 808797 | A | A | A | A | A | A | G | STM0738   | <i>sucC</i> | succinyl-CoA synthetase subunit beta                  |
| 809077 | A | A | C | C | C | C | C |           |             |                                                       |
| 809549 | G | G | A | G | G | G | G | STM0740   | <i>cydA</i> | cytochrome d terminal oxidase polypeptide subunit I   |
| 822373 | C | C | C | C | T | C | C | STM0758   | <i>ybgR</i> | zinc transporter ZitB                                 |
| 823015 | T | T | C | C | C | C | C |           |             |                                                       |
| 824986 | C | C | C | G | C | C | C |           |             |                                                       |
| 827228 | C | C | C | T | T | T | T | STM0761   | -           | fumarate hydratase                                    |
| 829687 | A | A | C | C | C | C | C | STM0763.s | -           | transcriptional regulator                             |
| 830161 | C | C | C | C | C | T | C | STM0765   | -           | putative cation transporter                           |
| 830395 | T | T | T | T | T | C | C |           |             |                                                       |
| 830431 | C | C | C | C | C | T | T |           |             |                                                       |
| 833835 | A | A | A | A | A | A | G | STM0769   | -           | putative cytoplasmic protein                          |
| 840291 | C | C | C | C | T | C | C | STM0775   | <i>galT</i> | galactose-1-phosphate uridylyltransferase             |
| 842595 | T | T | C | C | C | C | C | STM0777   | -           | putative inner membrane protein                       |
| 844732 | C | C | C | C | C | C | T | STM0779   | <i>modE</i> | DNA-binding transcriptional regulator ModE            |
| 844882 | C | A | C | C | C | C | C | STM0779   | <i>modE</i> | DNA-binding transcriptional regulator ModE            |
| 845874 | C | C | C | T | T | T | T | STM0781   | <i>modA</i> | molybdate transporter periplasmic protein             |
| 845877 | G | G | A | G | G | G | G | STM0781   | <i>modA</i> | molybdate transporter periplasmic protein             |

|         |   |   |   |   |   |   |   |         |                |                                                                                   |
|---------|---|---|---|---|---|---|---|---------|----------------|-----------------------------------------------------------------------------------|
| 846022  | C | C | C | C | C | C | T | STM0781 | <i>modA</i>    | molybdate transporter periplasmic protein                                         |
| 849044  | C | C | T | T | T | T | T | STM0785 | <i>ybhE</i>    | 6-phosphogluconolactonase                                                         |
| 849340  | G | G | G | G | G | A | G | STM0789 | <i>hutC</i>    | histidine utilization repressor                                                   |
| 854699  | C | C | C | C | T | C | C | STM0791 | <i>hutH</i>    | histidine ammonia-lyase                                                           |
| 855344  | G | G | G | G | G | G | T | STM0794 | <i>bioB</i>    | biotin synthetase                                                                 |
| 857768  | T | T | C | C | C | C | C | STM0795 | <i>bioF</i>    | 8-amino-7-oxononanoate synthase                                                   |
| 860887  | G | G | G | G | G | G | A | STM0798 | <i>uvrB</i>    | excinuclease ABC subunit B                                                        |
| 861294  | G | G | G | G | G | A | G | STM0800 | <i>slrP</i>    | leucine-rich repeat-containing protein                                            |
| 865056  | C | C | T | C | C | C | C | STM0801 | <i>ybhK</i>    | putative cytoplasmic protein                                                      |
| 867857  | G | G | G | A | G | G | G | STM0812 | <i>ybhO</i>    | cardiolipin synthase 2                                                            |
| 869448  | G | G | G | G | A | G | G | STM0813 | <i>ybhP</i>    | putative cytoplasmic protein                                                      |
| 877191  | G | G | G | G | G | T | G | STM0815 | <i>ybhR</i>    | putative transport protein                                                        |
| 878380  | A | A | A | A | A | A | G | STM0819 | <i>ybiH</i>    | putative DNA-binding transcriptional regulator                                    |
| 880432  | C | C | C | T | C | C | C | STM0820 | <i>rhlE</i>    | ATP-dependent RNA helicase RhlE                                                   |
| 884840  | G | G | G | G | G | C | G | STM0826 | <i>ybiN</i>    | putative SAM-dependent methyltransferase                                          |
| 885912  | A | A | T | A | A | A | A | STM0826 | <i>ybiN</i>    | putative SAM-dependent methyltransferase                                          |
| 890367  | G | G | A | G | G | G | G | STM0830 | <i>glnH</i>    | glutamine ABC transporter periplasmic protein                                     |
| 890922  | G | G | G | G | G | G | A | STM0836 | <i>ybiR</i>    | putative transporter                                                              |
| 891553  | A | A | G | A | A | A | A | STM0836 | <i>ybiR</i>    | putative transporter                                                              |
| 892158  | C | C | C | C | T | C | C | STM0836 | <i>ybiR</i>    | putative transporter                                                              |
| 896855  | A | A | A | A | A | A | T | STM0838 | <i>ybiT</i>    | putative ABC transporter ATPase component                                         |
| 897153  | C | C | C | C | C | C | T | STM0840 | <i>ybiV(2)</i> | putative hydrolase                                                                |
| 898135  | G | T | G | G | G | G | G | STM0842 | <i>ybiV(1)</i> | putative hydrolase                                                                |
| 898152  | G | G | G | G | T | G | G | STM0843 | <i>pflF</i>    | putative pyruvate formate lyase                                                   |
| 903224  | C | C | T | C | C | C | C | STM0848 | <i>ylIA</i>    | glutathione transporter ATP-binding protein                                       |
| 903231  | C | C | C | C | C | C | A | STM0852 | <i>ylIG</i>    | putative FeS oxidoreductase                                                       |
| 903600  | C | C | C | C | C | A | C | STM0855 | -              | putative electron transfer protein beta subunit                                   |
| 905034  | C | C | C | T | T | T | T | STM0858 | -              | putative dehydrogenase                                                            |
| 906561  | C | C | C | C | C | T | C | STM0862 | <i>yljI</i>    | putative glutathione S-transferase                                                |
| 908111  | G | G | G | T | G | G | G | STM0866 | <i>mdfA</i>    | multidrug translocase                                                             |
| 910763  | C | C | C | C | C | C | T | STM0866 | <i>mdfA</i>    | multidrug translocase                                                             |
| 911995  | C | C | T | C | C | C | C | STM0866 | <i>mdfA</i>    | multidrug translocase                                                             |
| 918814  | C | C | T | C | C | C | C | STM0868 | -              | putative transport protein/regulator                                              |
| 923926  | C | C | C | G | C | C | C | STM0873 | <i>ybjC</i>    | hypothetical protein<br>putrescine transporter subunit: membrane component of ABC |
| 927331  | G | G | G | G | G | G | A | STM0879 | <i>potH</i>    | superfamily<br>putrescine transporter subunit: membrane component of ABC          |
| 931369  | C | C | C | T | C | C | C | STM0879 | <i>potH</i>    | superfamily                                                                       |
| 935197  | C | C | C | C | C | C | A | STM0882 | <i>rumB</i>    | 23S rRNA methyluridine methyltransferase                                          |
| 939071  | A | A | C | C | C | C | C | STM0882 | <i>rumB</i>    | 23S rRNA methyluridine methyltransferase                                          |
| 939278  | G | G | G | G | G | A | G | STM0884 | <i>ulaA</i>    | ascorbate-specific PTS system enzyme IIC                                          |
| 939536  | A | A | A | A | A | A | G | STM0890 | <i>artI</i>    | arginine transport system                                                         |
| 940825  | G | G | G | G | G | A | G | STM0931 | <i>ybjR</i>    | putative amidase                                                                  |
| 945783  | G | G | A | G | G | G | G | STM0933 | <i>ybjT</i>    | putative nucleoside-diphosphate-sugar epimerase                                   |
| 951136  | C | C | C | C | C | T | C | STM0933 | <i>ybjT</i>    | putative nucleoside-diphosphate-sugar epimerase                                   |
| 951655  | C | C | C | C | A | C | C | STM0935 | <i>poxB</i>    | pyruvate dehydrogenase                                                            |
| 953338  | C | C | C | T | T | T | T | STM0935 | <i>poxB</i>    | pyruvate dehydrogenase                                                            |
| 953979  | T | T | T | T | T | C | T | STM0935 | <i>poxB</i>    | pyruvate dehydrogenase                                                            |
| 955747  | G | G | G | A | A | A | A | STM0937 | <i>hcp</i>     | hydroxylamine reductase                                                           |
| 960593  | G | G | G | G | G | A | G | STM0939 | <i>ybjD</i>    | hypothetical protein                                                              |
| 962579  | G | A | A | A | A | A | A | STM0939 | <i>ybjD</i>    | hypothetical protein                                                              |
| 1006260 | A | A | G | G | G | G | G | STM0941 | <i>ybjY</i>    | macrolide transporter subunit MacA                                                |
| 1008447 | T | T | C | T | T | T | T | STM0943 | <i>cspD</i>    | stress response protein                                                           |
| 1008800 | T | T | G | T | T | T | T | STM0957 | <i>cydD</i>    | cysteine/glutathione ABC transporter membrane/ATP-binding                         |
| 1010626 | C | C | C | T | T | T | T | STM0960 | <i>ftsK</i>    | DNA translocase FtsK                                                              |
| 1010876 | C | C | C | C | C | C | T | STM0962 | <i>ycaJ</i>    | recombination factor protein RarA                                                 |
| 1011134 | A | A | A | A | A | A | G | STM0962 | <i>ycaJ</i>    | recombination factor protein RarA                                                 |
| 1012978 | T | T | T | T | T | C | T | STM0965 | <i>dmsB</i>    | anaerobic dimethyl sulfoxide reductase subunit B                                  |
| 1016587 | C | G | G | G | G | G | G | STM0966 | <i>dmsC</i>    | anaerobic dimethyl sulfoxide reductase subunit C                                  |
| 1016588 | G | C | C | C | C | C | C | STM0968 | <i>ycaD</i>    | putative MFS family transporter protein                                           |
| 1019131 | C | C | C | C | C | C | T | STM0972 | -              | SopD-like protein                                                                 |
| 1021955 | G | G | G | G | G | G | A | STM0973 | <i>pflB</i>    | pyruvate formate lyase I                                                          |
| 1033710 | G | G | G | A | A | G | G | STM0983 | <i>ycaI</i>    | hypothetical protein                                                              |
| 1039304 | G | G | G | G | A | G | G | STM0983 | <i>ycaI</i>    | hypothetical protein                                                              |
| 1042477 | G | G | G | G | T | G | G | STM0985 | <i>lpxK</i>    | tetraacyldisaccharide 4'-kinase                                                   |
| 1043107 | C | C | C | A | A | A | A | STM0986 | <i>ycaQ</i>    | putative cytoplasmic protein                                                      |
| 1047990 | A | A | G | A | A | A | A | STM0990 | <i>ycbC</i>    | hypothetical protein                                                              |
| 1048639 | C | C | T | C | C | C | C | STM0994 | <i>mukB</i>    | cell division protein MukB                                                        |
| 1050732 | G | G | G | G | G | A | G | STM0994 | <i>mukB</i>    | cell division protein MukB                                                        |
| 1054707 | G | G | G | G | G | G | T | STM0994 | <i>mukB</i>    | cell division protein MukB                                                        |
| 1056907 | A | A | G | G | G | G | G | STM0995 | <i>ycbB</i>    | hypothetical protein                                                              |
| 1068646 | C | C | C | C | C | T | C |         |                |                                                                                   |
| 1070394 | G | G | T | G | G | G | G |         |                |                                                                                   |
| 1072252 | C | C | C | C | C | T | C |         |                |                                                                                   |
| 1074020 | C | C | C | C | C | C | T |         |                |                                                                                   |
| 1074484 | T | T | T | T | T | A | T |         |                |                                                                                   |
| 1077001 | G | G | G | A | A | A | A |         |                |                                                                                   |
| 1082214 | C | C | C | C | C | C | T |         |                |                                                                                   |
| 1083182 | C | C | T | C | C | C | C |         |                |                                                                                   |
| 1084462 | G | G | G | G | G | G | T |         |                |                                                                                   |
| 1086344 | C | C | C | C | C | C | T |         |                |                                                                                   |

|         |   |   |   |   |   |   |   |  |         |                                                                  |
|---------|---|---|---|---|---|---|---|--|---------|------------------------------------------------------------------|
| 1086996 | C | C | C | C | C | T | C |  |         |                                                                  |
| 1091084 | A | A | A | G | A | A | A |  |         |                                                                  |
| 1091092 | G | G | G | G | G | A | G |  |         |                                                                  |
| 1091225 | T | T | T | T | T | T | C |  |         |                                                                  |
| 1091258 | T | T | C | T | T | T | C |  |         |                                                                  |
| 1091323 | A | A | A | G | G | G | G |  |         |                                                                  |
| 1091384 | G | G | T | G | G | G | G |  |         |                                                                  |
| 1094630 | T | T | T | T | C | T | T |  | STM1002 | - diaminopropionate ammonia-lyase                                |
| 1095018 | T | T | C | C | C | C | C |  | STM1002 | - diaminopropionate ammonia-lyase                                |
| 1144044 | G | G | G | G | G | A | G |  |         |                                                                  |
| 1147052 | G | G | A | G | G | G | G |  | STM1058 | <i>pyrD</i> dihydroorotate dehydrogenase 2                       |
| 1151058 | C | C | C | C | C | C | A |  | STM1061 | <i>rlmL</i> 23S rRNA m(2)G2445 methyltransferase                 |
| 1152488 | T | T | C | C | C | C | C |  | STM1062 | <i>uup</i> ABC transporter ATPase component                      |
| 1154448 | T | T | C | T | T | T | T |  | STM1063 | <i>pqiA</i> paraquat-inducible protein A                         |
| 1154497 | G | G | G | G | G | A | G |  | STM1063 | <i>pqiA</i> paraquat-inducible protein A                         |
| 1154898 | C | C | T | C | C | C | C |  | STM1063 | <i>pqiA</i> paraquat-inducible protein A                         |
| 1157394 | T | T | T | T | C | T | T |  |         |                                                                  |
| 1157968 | G | G | A | A | A | A | A |  | STM1067 | <i>fabA</i> 3-hydroxydecanoyl-(acyl carrier protein) dehydratase |
| 1159447 | A | A | A | G | G | G | G |  | STM1068 | <i>lonH</i> putative protease                                    |
| 1162991 | G | G | G | G | G | G | A |  |         |                                                                  |
| 1167139 | C | C | C | C | T | C | C |  | STM1075 | <i>helD</i> DNA helicase IV                                      |
| 1167750 | T | T | T | T | C | T | T |  | STM1075 | <i>helD</i> DNA helicase IV                                      |
| 1181938 | G | G | G | G | A | G | G |  | STM1094 | <i>pipD</i> pathogenicity island-encoded protein D               |
| 1185063 | G | G | A | G | G | G | G |  |         |                                                                  |
| 1186029 | C | C | C | T | C | C | C |  | STM1099 | <i>hpaB</i> 4-hydroxyphenylacetate catabolism                    |
| 1186244 | A | A | A | A | A | G | A |  | STM1099 | <i>hpaB</i> 4-hydroxyphenylacetate catabolism                    |
| 1188121 | A | A | A | G | G | G | G |  |         |                                                                  |
| 1189483 | A | A | A | G | A | A | A |  | STM1101 | <i>hpaG</i> 4-hydroxyphenylacetate catabolism                    |
| 1191508 | C | C | G | C | C | A | C |  | STM1103 | <i>hpaD</i> 4-hydroxyphenylacetate catabolism                    |
| 1191831 | T | T | T | T | T | T | G |  |         |                                                                  |
| 1195022 | T | T | T | T | T | C | T |  | STM1107 | <i>hpaX</i> 4-hydroxyphenylacetate catabolism                    |
| 1195147 | C | C | C | C | C | A | C |  | STM1107 | <i>hpaX</i> 4-hydroxyphenylacetate catabolism                    |
| 1197770 | A | A | G | G | G | G | G |  | STM1110 | - hypothetical protein                                           |
| 1197788 | C | C | T | C | C | C | C |  | STM1110 | - hypothetical protein                                           |
| 1207649 | C | C | C | C | C | C | A |  |         |                                                                  |
| 1212882 | G | G | G | A | A | A | A |  | STM1125 | <i>putP</i> major sodium/proline symporter                       |
| 1213760 | C | C | C | A | T | C | C |  |         |                                                                  |
| 1217151 | C | C | C | C | C | C | A |  | STM1128 | - putative sodium/glucose cotransporter                          |
| 1217428 | G | G | G | A | G | G | G |  | STM1128 | - putative sodium/glucose cotransporter                          |
| 1219017 | A | A | G | A | A | A | A |  |         |                                                                  |
| 1219398 | G | G | G | G | G | G | A |  |         |                                                                  |
| 1219943 | C | C | C | C | C | C | T |  | STM1130 | - putative inner membrane protein                                |
| 1227565 | G | G | T | T | T | T | T |  | STM1138 | <i>ycdZ</i> putative inner membrane protein                      |
| 1229616 | A | A | A | C | A | A | A |  | STM1141 | <i>csgE</i> curli assembly protein CsgE                          |
| 1230558 | C | C | C | C | T | C | C |  |         |                                                                  |
| 1230605 | G | G | G | G | G | G | T |  |         |                                                                  |
| 1230714 | C | C | C | C | C | C | T |  |         |                                                                  |
| 1237939 | C | C | C | A | A | A | A |  | STM1150 | <i>mdoG</i> glucan biosynthesis protein G                        |
| 1241488 | G | G | G | G | G | G | A |  | STM1154 | <i>yceE</i> drug efflux system protein MdtG                      |
| 1243549 | T | T | T | C | T | T | T |  |         |                                                                  |
| 1245301 | G | G | G | G | G | A | G |  | STM1157 | <i>yceL</i> hypothetical protein                                 |
| 1249049 | C | C | C | C | T | C | C |  | STM1163 | <i>pyrC</i> dihydroorotase                                       |
| 1250251 | G | G | G | A | A | A | A |  |         |                                                                  |
| 1251870 | T | T | C | C | C | C | C |  | STM1166 | <i>yceL</i> multidrug resistance protein MdtH                    |
| 1252452 | A | A | G | G | G | G | G |  |         |                                                                  |
| 1253962 | A | A | G | G | G | G | G |  | STM1169 | <i>mviM</i> putative virulence protein                           |
| 1264878 | C | C | G | C | C | C | C |  | STM1182 | <i>flgJ</i> flagellar rod assembly protein/muramidase FlgJ       |
| 1266547 | G | G | G | G | G | A | G |  | STM1183 | <i>flgK</i> flagellar hook-associated protein FlgK               |
| 1271648 | C | C | C | C | C | C | T |  |         |                                                                  |
| 1272124 | G | G | G | T | G | G | G |  |         |                                                                  |
| 1275061 | G | G | G | G | G | G | A |  | STM1189 | <i>maf</i> Maf-like protein                                      |
| 1285864 | G | G | G | G | G | G | A |  | STM1202 | <i>ycfH</i> putative metallodependent hydrolase                  |
| 1286971 | C | C | C | C | C | C | A |  | STM1203 | <i>ptsG</i> glucose-specific PTS system IIBC components          |
| 1289038 | C | C | C | T | C | C | C |  | STM1204 | <i>fhuE</i> ferric-rhodotorulic acid outer membrane transporter  |
| 1289726 | G | G | G | T | G | G | G |  | STM1204 | <i>fhuE</i> ferric-rhodotorulic acid outer membrane transporter  |
| 1293721 | T | G | T | T | T | T | T |  | STM1210 | <i>ycfP</i> hypothetical protein                                 |
| 1295008 | G | G | A | G | G | G | G |  | STM1211 | <i>ndh</i> respiratory NADH dehydrogenase 2                      |
| 1295195 | A | A | A | A | A | A | G |  | STM1211 | <i>ndh</i> respiratory NADH dehydrogenase 2                      |
| 1295482 | A | A | T | T | T | T | T |  | STM1211 | <i>ndh</i> respiratory NADH dehydrogenase 2                      |
| 1297535 | C | C | A | C | C | C | C |  | STM1214 | <i>ycfR</i> putative outer membrane protein                      |
| 1297827 | C | C | C | C | C | T | C |  | STM1215 | <i>ycfS</i> putative periplasmic protein                         |
| 1300412 | G | G | G | G | G | A | G |  | STM1216 | <i>mfd</i> transcription-repair coupling factor                  |
| 1325786 | A | A | C | A | A | A | A |  |         |                                                                  |
| 1328310 | T | T | T | G | G | G | G |  | STM1240 | <i>envF</i> putative envelope lipoprotein                        |
| 1330273 | A | A | G | A | A | A | A |  | STM1242 | <i>envE</i> putative envelope protein                            |
| 1332863 | G | G | G | G | G | G | T |  |         |                                                                  |
| 1333741 | A | A | A | A | A | A | T |  |         |                                                                  |
| 1339533 | C | C | C | C | C | T | C |  | STM1255 | - putative ABC transporter periplasmic binding protein           |
| 1340207 | A | A | A | A | A | A | G |  | STM1255 | - putative ABC transporter periplasmic binding protein           |
| 1340820 | A | A | A | A | C | A | A |  | STM1256 | - putative ABC transporter protein                               |
| 1345335 | G | G | G | G | G | C | G |  | STM1261 | - putative cytoplasmic protein                                   |

|         |   |   |   |   |   |   |   |           |               |                                                                     |
|---------|---|---|---|---|---|---|---|-----------|---------------|---------------------------------------------------------------------|
| 1349404 | T | T | T | C | C | C | C | STM1267   | -             | putative cytoplasmic protein                                        |
| 1351518 | A | A | G | G | G | G | G | STM1271   | <i>yeaR</i>   | putative cytoplasmic protein                                        |
| 1355815 | C | C | C | C | C | C | A | STM1278   | <i>yeaN</i>   | putative amino acid/amine transport protein                         |
| 1366249 | G | G | G | G | T | G | G | STM1287   | -             | arylsulfatase regulator                                             |
| 1368428 | C | C | C | C | C | C | T |           |               |                                                                     |
| 1369868 | G | G | G | G | G | G | A |           |               |                                                                     |
| 1373336 | C | C | C | C | A | C | C | STM1295   | <i>sppA</i>   | protease 4                                                          |
| 1376514 | A | A | A | A | A | T | A | STM1297   | <i>selD</i>   | selenophosphate synthetase                                          |
| 1376541 | G | G | A | G | G | G | G | STM1297   | <i>selD</i>   | selenophosphate synthetase                                          |
| 1379089 | G | G | G | G | G | G | A | STM1299   | <i>gdhA</i>   | glutamate dehydrogenase                                             |
| 1384413 | G | G | G | G | A | G | G | STM1304   | <i>astA</i>   | arginine succinyltransferase                                        |
| 1385909 | G | G | A | G | G | G | G | STM1305   | <i>astD</i>   | succinylglutamic semialdehyde dehydrogenase                         |
| 1386863 | T | T | C | C | C | C | C | STM1306   | <i>astB</i>   | succinylarginine dihydrolase                                        |
| 1389962 | C | C | A | C | C | C | C | STM1309   | -             | nucleotide excision repair endonuclease                             |
| 1391065 | G | G | A | G | G | G | G |           |               |                                                                     |
| 1392139 | T | T | C | T | T | T | T |           |               |                                                                     |
| 1392521 | G | G | G | G | G | T | A | STM1313   | <i>celB</i>   | N,N'-diacetylchitobiose-specific PTS system transporter subunit IIC |
| 1395638 | C | C | C | C | C | C | A | STM1316   | <i>celF</i>   | phospho-beta-glucosidase/cellobiose-6-phosphate hydrolase           |
| 1397550 | T | T | C | T | T | T | T | STM1318   | <i>katE</i>   | hydroperoxidase II                                                  |
| 1399017 | T | T | T | T | T | T | C | STM1318   | <i>katE</i>   | hydroperoxidase II                                                  |
| 1399878 | A | A | G | G | G | G | G | STM1319   | <i>cedA</i>   | cell division modulator                                             |
| 1402748 | G | G | A | G | G | G | G | STM1322   | <i>yniC</i>   | 2-deoxyglucose-6-phosphatase                                        |
| 1407904 | G | G | A | G | G | G | G | STM1328   | -             | putative outer membrane protein                                     |
| 1407960 | G | G | G | G | A | G | G | STM1328   | -             | putative outer membrane protein                                     |
| 1411141 | T | T | T | T | T | C | T | STM1332   | <i>rfc</i>    | O-antigen polymerase                                                |
| 1418133 | G | G | G | G | G | A | G | STM1338   | <i>pheT</i>   | phenylalanyl-tRNA synthetase subunit beta                           |
| 1419373 | A | A | C | A | A | A | A |           |               |                                                                     |
| 1421248 | C | C | C | C | C | T | C | STM1342   | <i>btuD</i>   | vitamin B12-transporter ATPase                                      |
| 1423128 | G | G | G | G | G | A | G | STM1344   | <i>ydiV</i>   | hypothetical protein                                                |
| 1424483 | C | C | C | C | C | T | C | STM1345   | <i>ydiU</i>   | hypothetical protein                                                |
| 1426855 | C | C | C | C | A | C | C | STM1348   | <i>ydiA</i>   | hypothetical protein                                                |
| 1427125 | C | C | T | C | C | C | C | STM1348   | <i>ydiA</i>   | hypothetical protein                                                |
| 1430871 | G | G | A | G | G | G | G | STM1350   | <i>ydiD</i>   | short chain acyl-CoA synthetase                                     |
| 1432074 | C | C | C | C | C | T | C | STM1351   | <i>ydiT</i>   | putative ferredoxin                                                 |
| 1433078 | C | C | C | G | C | C | C | STM1352   | <i>ydiS</i>   | hypothetical protein                                                |
| 1433404 | A | A | A | A | T | A | A | STM1352   | <i>ydiS</i>   | hypothetical protein                                                |
| 1434449 | G | G | G | G | G | G | T | STM1353   | <i>ydiR</i>   | electron transfer flavoprotein subunit YdiR                         |
| 1434552 | G | G | G | A | A | A | A | STM1354   | <i>ydiQ</i>   | putative electron transfer flavoprotein YdiQ                        |
| 1434804 | C | C | C | A | A | A | A | STM1354   | <i>ydiQ</i>   | putative electron transfer flavoprotein YdiQ                        |
| 1435143 | G | G | G | G | G | A | G | STM1354   | <i>ydiQ</i>   | putative electron transfer flavoprotein YdiQ                        |
| 1436405 | A | A | A | A | A | C | A | STM1355   | <i>ydiP</i>   | putative transcriptional regulator                                  |
| 1438217 | C | C | C | T | T | T | T | STM1357.S | <i>ydiF</i>   | putative acetyl-CoA/acetoacetyl-CoA transferase beta subunit        |
| 1441370 | C | C | C | C | C | A | C | STM1360   | <i>ydiN</i>   | putative transport protein                                          |
| 1442885 | C | C | C | C | T | C | C |           |               |                                                                     |
| 1443088 | G | G | G | G | G | A | G | STM1361   | <i>ydiM</i>   | putative transport protein                                          |
| 1444106 | C | C | C | C | C | C | T | STM1361   | <i>ydiM</i>   | putative transport protein                                          |
| 1447539 | C | C | T | C | C | C | C | STM1365   | <i>ydiJ</i>   | putative oxidase                                                    |
| 1449287 | G | G | T | G | G | G | G | STM1365   | <i>ydiJ</i>   | putative oxidase                                                    |
| 1450438 | G | G | G | G | A | G | G |           |               |                                                                     |
| 1453535 | T | T | T | T | T | T | C | STM1370   | <i>sufB</i>   | cysteine desulfurase activator complex subunit SufB                 |
| 1454734 | C | C | T | C | C | C | C | STM1371   | <i>sufC</i>   | cysteine desulfurase ATPase component                               |
| 1458632 | C | C | T | C | C | C | C | STM1375   | <i>ynhG</i>   | hypothetical protein                                                |
| 1461717 | A | A | A | A | G | A | A |           |               |                                                                     |
| 1464205 | T | T | A | T | T | T | T | STM1381   | <i>orf245</i> | putative cytoplasmic protein                                        |
| 1464653 | A | A | T | A | A | A | A | STM1381   | <i>orf245</i> | putative cytoplasmic protein                                        |
| 1467642 | G | G | G | G | G | G | A | STM1383   | <i>ttrA</i>   | tetrathionate reductase complex subunit A                           |
| 1468517 | A | A | A | A | A | A | G | STM1383   | <i>ttrA</i>   | tetrathionate reductase complex subunit A                           |
| 1469873 | C | C | C | T | T | T | T | STM1384   | <i>ttrC</i>   | tetrathionate reductase complex subunit C                           |
| 1469905 | C | C | C | T | T | T | T | STM1384   | <i>ttrC</i>   | tetrathionate reductase complex subunit C                           |
| 1472575 | C | C | T | C | C | C | C | STM1386   | <i>ttrS</i>   | sensory histidine kinase                                            |
| 1472610 | T | T | T | T | T | T | G | STM1386   | <i>ttrS</i>   | sensory histidine kinase                                            |
| 1475448 | T | T | C | C | C | C | C | STM1390   | <i>orf242</i> | putative regulatory protein                                         |
| 1475757 | C | C | C | C | T | C | C | STM1390   | <i>orf242</i> | putative regulatory protein                                         |
| 1475791 | T | T | T | G | G | G | G | STM1390   | <i>orf242</i> | putative regulatory protein                                         |
| 1478843 | C | C | C | C | C | C | T | STM1392   | <i>ssrA</i>   | sensor kinase                                                       |
| 1479444 | T | T | T | T | T | T | C | STM1392   | <i>ssrA</i>   | sensor kinase                                                       |
| 1479744 | A | G | A | A | A | A | A |           |               |                                                                     |
| 1482737 | C | C | C | C | T | C | C | STM1395   | <i>ssaD</i>   | virulence protein                                                   |
| 1484647 | A | A | A | A | A | A | G | STM1399   | <i>ssaC</i>   | secretion system chaparone                                          |
| 1486104 | C | C | C | C | C | C | T | STM1400   | <i>sseC</i>   | translocation machinery component                                   |
| 1490997 | G | T | G | G | G | G | G | STM1409   | <i>ssaJ</i>   | needle complex inner membrane lipoprotein                           |
| 1491462 | C | G | C | C | C | C | C | STM1410   | -             | putative cytoplasmic protein                                        |
| 1491909 | T | T | T | T | T | T | C | STM1411   | <i>ssaK</i>   | type III secretion system apparatus protein                         |
| 1492648 | T | T | T | T | T | T | C | STM1412   | <i>ssaL</i>   | type III secretion system apparatus protein                         |
| 1493940 | A | A | A | A | G | A | A | STM1414   | <i>ssaV</i>   | secretion system apparatus protein SsaV                             |
| 1496024 | C | C | A | C | C | C | C | STM1415   | <i>ssaN</i>   | type III secretion system ATPase                                    |
| 1500750 | T | T | T | T | G | T | T | STM1422   | <i>ssaU</i>   | secretion system apparatus protein SsaU                             |
| 1501100 | C | C | C | C | C | C | T | STM1422   | <i>ssaU</i>   | secretion system apparatus protein SsaU                             |
| 1503292 | C | G | G | G | G | G | G | STM1425   | <i>ydhE</i>   | multidrug efflux protein                                            |
| 1503293 | G | C | C | C | C | C | C | STM1425   | <i>ydhE</i>   | multidrug efflux protein                                            |
| 1507887 | G | G | G | G | G | G | A | STM1429   | <i>ydhB</i>   | putative DNA-binding transcriptional regulator                      |



|         |   |   |   |   |   |   |   |           |             |                                                     |
|---------|---|---|---|---|---|---|---|-----------|-------------|-----------------------------------------------------|
| 1509948 | G | G | G | A | A | A | A | STM1431   | <i>sodB</i> | superoxide dismutase                                |
| 1511393 | G | G | A | G | G | G | G | STM1433   | <i>ydhD</i> | hypothetical protein                                |
| 1514452 | G | G | G | C | G | G | G | STM1437   | <i>ydhM</i> | putative transcriptional repressor                  |
| 1514714 | A | A | A | A | A | A | G |           |             |                                                     |
| 1517198 | C | C | A | C | C | C | C | STM1441   | -           | putative inner membrane protein                     |
| 1519038 | C | C | T | C | C | C | C | STM1442   | <i>ydjH</i> | putative multidrug resistance efflux pump           |
| 1520176 | C | G | G | G | G | G | G | STM1444   | <i>slyA</i> | transcriptional regulator SlyA                      |
| 1520177 | G | C | C | C | C | C | C | STM1444   | <i>slyA</i> | transcriptional regulator SlyA                      |
| 1522102 | G | G | A | G | G | G | G | STM1446   | <i>anmK</i> | anhydro-N-acetylmuramic acid kinase                 |
| 1522658 | G | A | G | G | G | G | G |           |             |                                                     |
| 1523590 | C | C | C | C | C | C | T | STM1449   | <i>tyrS</i> | tyrosyl-tRNA synthetase                             |
| 1528100 | C | C | C | C | T | C | C |           |             |                                                     |
| 1528912 | C | C | C | C | C | T | C |           |             |                                                     |
| 1535782 | A | A | A | A | A | A | G | STM1453   | <i>nth</i>  | endonuclease III                                    |
| 1536627 | C | G | G | G | G | G | G |           |             |                                                     |
| 1536628 | G | C | C | C | C | C | C | STM1462.S | <i>ydjJ</i> | putative oxidoreductase                             |
| 1540174 | T | T | T | T | T | T | T | STM1462.S | <i>ydjJ</i> | putative oxidoreductase                             |
| 1545530 | T | T | T | T | T | T | C | STM1466   | <i>ydgA</i> | putative periplasmic protein                        |
| 1549620 | T | C | T | T | T | T | T | STM1470   | <i>tus</i>  | DNA replication terminus site-binding protein       |
| 1552081 | C | C | C | A | A | A | A |           |             |                                                     |
| 1552325 | C | T | T | T | T | T | T |           |             |                                                     |
| 1552332 | C | C | C | C | C | T | C | STM1476   | <i>ydjC</i> | putative inner membrane protein                     |
| 1553421 | G | G | G | G | T | G | G | STM1476   | <i>ydjC</i> | putative inner membrane protein                     |
| 1556840 | G | G | C | G | G | G | G | STM1477   | <i>ydjI</i> | putative amino acid transporter                     |
| 1556842 | C | C | T | C | C | C | C | STM1479   | <i>pntA</i> | NAD(P) transhydrogenase subunit alpha               |
| 1559600 | A | G | A | A | A | A | A | STM1479   | <i>pntA</i> | NAD(P) transhydrogenase subunit alpha               |
| 1560093 | C | C | C | C | C | C | A | STM1481   | <i>tqsA</i> | putative transport protein                          |
| 1561243 | T | T | T | T | T | T | C |           |             |                                                     |
| 1562642 | A | A | G | G | G | G | G | STM1484   | -           | putative protease                                   |
| 1566127 | C | C | C | C | C | T | C | STM1488   | <i>mlc</i>  | pts operon transcriptional repressor                |
| 1566995 | A | A | A | A | G | A | A | STM1489   | <i>bioD</i> | putative dithiobiotin synthetase                    |
| 1569157 | T | T | T | T | T | T | G | STM1491   | -           | proline/glycine betaine transport systems           |
| 1572232 | T | T | C | C | C | C | C |           |             |                                                     |
| 1572279 | G | G | A | G | G | G | G | STM1495   | <i>ynfI</i> | twin-arginine leader-binding protein DmsD           |
| 1575217 | C | C | C | C | C | C | T | STM1498   | -           | putative dimethyl sulphoxide reductase              |
| 1578624 | C | C | C | C | G | T | C | STM1499   | -           | putative dimethyl sulphoxide reductase chain A1     |
| 1597961 | G | G | G | G | C | G | A |           |             |                                                     |
| 1601132 | G | G | G | G | T | G | G |           |             |                                                     |
| 1604077 | G | G | G | G | G | G | A |           |             |                                                     |
| 1605312 | G | G | G | G | G | G | C | STM1528   | -           | putative outer membrane protein                     |
| 1606313 | T | T | T | T | T | T | C |           |             |                                                     |
| 1609324 | C | C | T | C | C | C | C | STM1533   | -           | putative hydrogenase                                |
| 1609983 | T | C | T | T | T | T | T | STM1534   | -           | putative hydrogenase                                |
| 1613237 | C | C | C | C | C | T | C | STM1538   | -           | putative hydrogenase-1 large subunit                |
| 1616050 | C | C | C | C | C | T | C | STM1540   | -           | putative hydrolase                                  |
| 1623223 | T | T | T | T | T | T | A | STM1546   | -           | hypothetical protein                                |
| 1629704 | T | T | C | T | T | T | T |           |             |                                                     |
| 1629710 | G | G | G | G | A | G | G |           |             |                                                     |
| 1634667 | G | G | G | G | G | A | G | STM1556   | -           | putative Na <sup>+</sup> /H <sup>+</sup> antiporter |
| 1634850 | G | G | A | G | G | G | G | STM1557   | -           | putative aminotransferase                           |
| 1635911 | G | G | G | G | G | G | A | STM1557   | -           | putative aminotransferase                           |
| 1636881 | A | A | A | A | A | A | A | STM1558   | -           | putative glycosyl hydrolase                         |
| 1638874 | T | C | T | T | T | T | T | STM1559   | -           | putative glycosyl hydrolase                         |
| 1641020 | C | C | C | C | C | C | T | STM1560   | -           | putative alpha amylase                              |
| 1641846 | A | A | T | A | A | A | A | STM1560   | -           | putative alpha amylase                              |
| 1646053 | G | G | G | G | G | G | A | STM1566   | <i>sfcA</i> | malate dehydrogenase                                |
| 1647708 | G | G | A | G | G | G | G |           |             |                                                     |
| 1648363 | C | C | C | T | T | T | T | STM1567   | <i>adhP</i> | alcohol dehydrogenase                               |
| 1648485 | C | C | T | C | C | C | C | STM1567   | <i>adhP</i> | alcohol dehydrogenase                               |
| 1654528 | C | C | T | C | C | C | C | STM1571   | <i>yddG</i> | hypothetical protein                                |
| 1663133 | G | G | G | G | G | G | A | STM1577   | <i>narZ</i> | nitrate reductase 2 alpha subunit                   |
| 1665367 | G | T | G | G | G | G | G | STM1578   | <i>narY</i> | nitrate reductase 2 beta subunit                    |
| 1666715 | A | A | G | A | A | A | A | STM1580   | <i>narV</i> | nitrate reductase 2 gamma subunit                   |
| 1667356 | G | G | G | G | G | G | T |           |             |                                                     |
| 1670711 | C | C | C | C | T | C | C | STM1584   | <i>ansP</i> | L-asparagine transport protein                      |
| 1679999 | G | G | G | G | G | G | A | STM1593   | <i>srfA</i> | putative virulence protein                          |
| 1681257 | A | A | A | A | A | A | A | STM1594   | <i>srfB</i> | putative virulence protein                          |
| 1685999 | A | A | A | A | A | A | T | STM1595   | <i>srfC</i> | putative virulence protein                          |
| 1686788 | G | G | G | G | G | A | G |           |             |                                                     |
| 1688685 | G | G | G | G | G | A | A | STM1598   | <i>ycdR</i> | putative regulatory protein                         |
| 1689580 | T | T | T | T | G | T | T | STM1598   | <i>ycdR</i> | putative regulatory protein                         |
| 1693045 | G | G | G | G | G | A | G | STM1602   | <i>sifB</i> | secreted effector protein                           |
| 1693583 | G | G | A | G | G | G | G | STM1603   | <i>yncl</i> | putative periplasmic protein                        |
| 1696282 | C | C | C | C | C | T | C |           |             |                                                     |
| 1696377 | T | T | T | T | T | T | T | STM1606   | -           | putative benzoate membrane transport protein        |
| 1698750 | C | C | T | C | C | C | C | STM1608   | <i>tehB</i> | tellurite resistance protein TehB                   |
| 1707488 | C | C | C | T | C | C | C | STM1619   | -           | cryptic aminoglycoside resistance gene              |
| 1709528 | G | G | G | G | G | A | A | STM1621   | -           | putative periplasmic protein                        |
| 1711289 | G | G | G | G | G | G | A | STM1622   | <i>mdoD</i> | glucan biosynthesis protein D                       |
| 1712022 | C | C | C | C | C | C | T | STM1623   | -           | putative carboxylesterase                           |
| 1713519 | C | C | C | T | C | C | C | STM1624   | -           | putative cytoplasmic protein                        |

|         |   |   |   |   |   |   |   |           |             |                                                                                           |
|---------|---|---|---|---|---|---|---|-----------|-------------|-------------------------------------------------------------------------------------------|
| 1715973 | C | G | G | G | G | G | G | STM1626   | <i>trg</i>  | methyl-accepting chemotaxis protein III                                                   |
| 1715974 | G | C | C | C | C | C | C | STM1626   | <i>trg</i>  | methyl-accepting chemotaxis protein III                                                   |
| 1719464 | A | A | A | A | A | A | G |           |             |                                                                                           |
| 1719593 | A | A | A | G | G | G | G |           |             |                                                                                           |
| 1719600 | A | A | A | A | A | A | T |           |             |                                                                                           |
| 1720793 | G | G | G | G | G | A | G | STM1630   | -           | putative inner membrane protein                                                           |
| 1721077 | T | T | T | T | T | T | G |           |             |                                                                                           |
| 1721078 | A | A | A | A | A | A | T |           |             |                                                                                           |
| 1726885 | C | C | C | C | C | C | T | STM1637   | -           | putative inner membrane protein                                                           |
| 1727217 | G | G | G | G | G | G | A | STM1637   | -           | putative inner membrane protein                                                           |
| 1728535 | T | T | T | T | T | T | G |           |             |                                                                                           |
| 1728633 | C | C | T | C | C | C | C |           |             |                                                                                           |
| 1729842 | A | A | A | A | A | A | C | STM1639   | <i>cybB</i> | cytochrome b561                                                                           |
| 1734882 | G | G | G | T | T | T | T | STM1641   | <i>hrpA</i> | ATP-dependent RNA helicase HrpA                                                           |
| 1737576 | A | G | A | A | A | A | A | STM1646   | <i>ydbH</i> | hypothetical protein                                                                      |
| 1744629 | T | T | T | T | C | T | T | STM1651   | <i>nifJ</i> | putative pyruvate-flavodoxin oxidoreductase                                               |
| 1747291 | T | T | T | T | C | T | T |           |             |                                                                                           |
| 1747315 | G | G | G | A | G | G | G | STM1654   | <i>ydaO</i> | C32 tRNA thiolase                                                                         |
| 1750432 | G | G | A | G | G | G | G | STM1656   | <i>zntB</i> | zinc transporter                                                                          |
| 1752424 | C | C | C | A | A | A | A | STM1657   | -           | putative methyl-accepting chemotaxis protein                                              |
| 1753235 | A | A | C | C | C | C | C | STM1658   | <i>ydaL</i> | hypothetical protein                                                                      |
| 1755042 | G | G | A | G | G | G | G | STM1660.S | <i>fnr</i>  | fumarate/nitrate reduction transcriptional regulator                                      |
| 1760231 | A | A | G | G | G | G | G | STM1667   | -           | putative thiol peroxidase                                                                 |
| 1760464 | G | G | G | G | G | G | A | STM1668   | -           | hypothetical protein                                                                      |
| 1762533 | G | G | G | G | G | A | G | STM1669   | -           | invasin-like protein                                                                      |
| 1764140 | G | G | G | G | G | G | A |           |             |                                                                                           |
| 1766075 | A | A | C | C | C | C | C |           |             |                                                                                           |
| 1766388 | C | T | C | C | C | C | C |           |             |                                                                                           |
| 1767821 | G | G | G | G | G | G | A | STM1674   | -           | putative regulatory protein                                                               |
| 1767910 | G | G | G | G | G | G | A | STM1674   | -           | putative regulatory protein                                                               |
| 1769578 | C | T | C | C | C | C | C | STM1676   | -           | putative aldo/keto reductase                                                              |
| 1770492 | G | G | G | G | T | G | G | STM1677   | -           | putative transcriptional regulator                                                        |
| 1772479 | G | G | G | G | A | G | G | STM1679   | <i>mppA</i> | periplasmic murein tripeptide transport protein                                           |
| 1774909 | G | G | G | G | G | G | A | STM1681   | <i>ycjG</i> | putative chloromuconate cycloisomerase                                                    |
| 1787886 | G | G | T | G | G | G | G | STM1695   | <i>sapD</i> | peptide transport protein                                                                 |
| 1788469 | C | C | C | C | T | C | C | STM1696   | <i>sapF</i> | peptide transport protein                                                                 |
| 1790318 | T | T | T | T | T | T | C | STM1698   | -           | putative inner membrane protein                                                           |
| 1791603 | C | C | T | T | T | T | T | STM1698A  | -           | hypothetical protein                                                                      |
| 1791757 | G | G | G | G | A | G | G | STM1699   | <i>ycjE</i> | putative cytoplasmic protein                                                              |
| 1791955 | G | G | G | G | G | A | G | STM1699   | <i>ycjE</i> | putative cytoplasmic protein                                                              |
| 1794104 | A | A | G | G | G | G | G | STM1701   | <i>yciW</i> | putative cytoplasmic protein                                                              |
| 1795072 | A | A | A | A | C | A | A | STM1702   | <i>rnb</i>  | exoribonuclease II                                                                        |
| 1798548 | G | G | G | A | G | G | G |           |             |                                                                                           |
| 1802625 | A | A | A | A | A | G | A | STM1708   | <i>yciM</i> | tetratricopeptide repeat protein                                                          |
| 1804153 | G | G | G | G | T | G | G | STM1711   | <i>ribA</i> | GTP cyclohydrolase II                                                                     |
| 1807705 | T | C | T | T | T | T | T |           |             |                                                                                           |
| 1811292 | T | T | T | T | T | T | C | STM1714   | <i>topA</i> | DNA topoisomerase I                                                                       |
| 1818364 | C | C | C | T | C | C | C |           |             |                                                                                           |
| 1819011 | G | G | A | G | G | G | G | STM1723   | <i>trpE</i> | anthranilate synthase component I                                                         |
| 1819111 | A | A | A | C | C | C | C | STM1723   | <i>trpE</i> | anthranilate synthase component I<br>bifunctional glutamine amidotransferase/anthranilate |
| 1821180 | C | C | T | T | T | T | T | STM1724   | <i>trpD</i> | phosphoribosyltransferase                                                                 |
| 1824055 | C | C | C | C | C | T | C | STM1726   | <i>trpB</i> | tryptophan synthase subunit beta                                                          |
| 1826859 | A | A | A | A | G | A | A | STM1730   | <i>yciE</i> | putative cytoplasmic protein                                                              |
| 1832849 | T | T | C | C | C | C | C |           |             |                                                                                           |
| 1833733 | T | A | T | T | T | T | T | STM1739   | <i>cls</i>  | cardiolipin synthetase                                                                    |
| 1834692 | G | G | G | G | T | G | G |           |             |                                                                                           |
| 1835453 | G | G | A | G | G | G | G | STM1741   | -           | putative voltage-gated potassium channel                                                  |
| 1838555 | G | G | G | G | A | G | G |           |             |                                                                                           |
| 1841633 | T | T | C | T | T | T | T |           |             |                                                                                           |
| 1851523 | G | A | G | G | G | G | G |           |             |                                                                                           |
| 1852945 | G | G | A | G | G | G | G |           |             |                                                                                           |
| 1852948 | T | T | C | T | T | T | T |           |             |                                                                                           |
| 1855104 | T | T | T | T | T | T | A | STM1760   | -           | TPR repeat-containing protein                                                             |
| 1858306 | T | T | T | T | T | T | C | STM1763   | <i>narH</i> | nitrate reductase 1 beta subunit                                                          |
| 1864253 | G | G | G | G | G | T | G |           |             |                                                                                           |
| 1868812 | C | C | C | T | C | C | C | STM1770   | <i>chaB</i> | cation transport regulator                                                                |
| 1871120 | G | G | A | G | G | G | G | STM1772   | <i>kdsA</i> | 2-dehydro-3-deoxyphosphooctonate aldolase                                                 |
| 1874952 | C | C | T | C | C | C | C | STM1777   | <i>hemA</i> | glutamyl-tRNA reductase                                                                   |
| 1882182 | C | C | C | T | T | T | T | STM1784   | <i>ychF</i> | GTP-dependent nucleic acid-binding protein EngD                                           |
| 1885235 | T | T | C | C | C | C | C | STM1786   | -           | hydrogenase-1 small subunit                                                               |
| 1891427 | C | C | C | G | G | G | G | STM1792   | -           | putative cytochrome oxidase subunit I                                                     |
| 1893429 | T | T | T | T | T | T | C |           |             |                                                                                           |
| 1895034 | C | C | C | C | C | C | T |           |             |                                                                                           |
| 1895814 | A | A | A | G | A | A | A | STM1796   | <i>treA</i> | trehalase                                                                                 |
| 1896582 | A | A | T | T | T | T | T | STM1796   | <i>treA</i> | trehalase                                                                                 |
| 1899779 | G | G | G | A | G | G | G |           |             |                                                                                           |
| 1903952 | G | G | G | G | G | A | G | STM1803   | <i>dadA</i> | D-amino acid dehydrogenase small subunit                                                  |
| 1905645 | A | A | G | A | A | A | A | STM1804.S | <i>ycgB</i> | SpoVR family protein                                                                      |
| 1910115 | C | C | C | C | A | C | C |           |             |                                                                                           |
| 1919931 | G | G | A | G | G | G | G | STM1821   | <i>yoaA</i> | putative DNA helicase                                                                     |

|         |   |   |   |   |   |   |   |            |             |                                                                                     |
|---------|---|---|---|---|---|---|---|------------|-------------|-------------------------------------------------------------------------------------|
| 1924613 | G | G | G | A | A | A | A | STM1826    | <i>sdaA</i> | L-serine deaminase I/L-threonine deaminase I                                        |
| 1924975 | G | G | G | A | A | A | A | STM1827.5  | -           | putative diguanylate cyclase/phosphodiesterase                                      |
| 1931188 | C | T | C | C | C | C | C | STM1832    | <i>manZ</i> | mannose-specific PTS system protein IID                                             |
| 1931734 | T | T | G | G | G | G | G | STM1833    | -           | hypothetical protein                                                                |
| 1932974 | C | C | C | C | A | C | C | STM1835    | <i>rrmA</i> | 23S rRNA methyltransferase A                                                        |
| 1933420 | C | C | T | C | C | C | C | STM1835    | <i>rrmA</i> | 23S rRNA methyltransferase A                                                        |
| 1937261 | G | G | G | G | G | G | A | STM1841    | -           | hypothetical protein                                                                |
| 1938616 | C | C | T | T | T | T | C | STM1843    | -           | putative transport protein                                                          |
| 1939956 | T | T | C | C | C | C | C | STM1856    | -           | putative cytoplasmic protein                                                        |
| 1953539 | C | C | T | C | C | C | C | STM1858    | -           | putative cytoplasmic protein                                                        |
| 1955831 | G | G | G | G | G | A | G | STM1869A   | -           | hypothetical protein                                                                |
| 1966250 | A | A | A | A | A | A | G | STM1873    | -           | hypothetical protein                                                                |
| 1968415 | T | T | T | T | T | T | C | STM1879    | <i>ptrB</i> | protease 2                                                                          |
| 1973546 | A | G | A | A | A | A | A | STM1883    | <i>purT</i> | phosphoribosylglycinamide formyltransferase 2                                       |
| 1975552 | C | C | C | C | C | G | C | STM1895    | <i>ruvA</i> | Holliday junction DNA helicase RuvA                                                 |
| 1976770 | G | G | G | G | T | G | G | STM1896    | -           | putative cytoplasmic protein                                                        |
| 1977615 | G | G | G | G | G | C | G | STM1901    | <i>aspS</i> | aspartyl-tRNA synthetase                                                            |
| 1990238 | C | C | T | C | C | C | C | STM1905    | <i>yecO</i> | putative SAM-dependent methyltransferase                                            |
| 1991586 | T | T | T | T | T | C | T | STM1906    | <i>yecP</i> | putative enzyme                                                                     |
| 1992301 | C | C | T | C | C | C | C | STM1907    | <i>cutC</i> | copper homeostasis protein CutC                                                     |
| 1996646 | C | T | C | C | C | C | C | STM1910    | -           | putative penicillin-binding protein                                                 |
| 1999662 | C | C | T | C | C | C | C | STM1913    | <i>flhA</i> | flagellar biosynthesis protein FlhA                                                 |
| 2000243 | C | C | C | C | C | T | C | STM1914    | <i>flhB</i> | flagellar biosynthesis protein FlhB                                                 |
| 2001565 | G | G | G | G | G | G | T | STM1921    | <i>cheA</i> | chemotaxis protein CheA                                                             |
| 2006248 | A | A | C | A | A | A | A | STM1921    | <i>cheA</i> | chemotaxis protein CheA                                                             |
| 2009795 | C | C | C | C | C | C | T | STM1928    | <i>otsA</i> | trehalose-6-phosphate synthase                                                      |
| 2011217 | T | T | T | T | T | A | T | STM1929    | <i>otsB</i> | trehalose-6-phosphate phosphatase                                                   |
| 2018120 | G | G | G | G | G | G | A | STM1931    | <i>araH</i> | putative intracellular protease/amidase                                             |
| 2018225 | A | A | A | A | A | A | A | STM1932    | <i>ftnB</i> | ferritin-like protein                                                               |
| 2022500 | C | C | C | C | C | T | C | STM1935    | <i>ftn</i>  | ferritin                                                                            |
| 2023495 | C | C | A | C | C | C | C | STM1937    | <i>tyrP</i> | tyrosine-specific transport protein                                                 |
| 2025018 | G | G | G | G | G | A | G | STM1940    | -           | putative cell wall-associated hydrolase                                             |
| 2025944 | G | G | G | A | G | G | G | STM1944    | <i>glyW</i> | Gly tRNA                                                                            |
| 2026496 | T | T | C | T | T | T | T | STM1946    | <i>uvrC</i> | excinuclease ABC subunit C                                                          |
| 2026918 | T | T | T | T | T | C | T | STM1951    | <i>yecC</i> | putative amino-acid ABC transporter ATP-binding protein YecC                        |
| 2027036 | G | G | G | A | G | G | G | STM1958    | <i>fliB</i> | lysine-N-methylase                                                                  |
| 2027304 | A | A | A | A | A | G | A | STM1959    | <i>fliC</i> | flagellin                                                                           |
| 2029703 | G | G | G | A | G | G | G | STM1962    | <i>fliT</i> | flagellar biosynthesis protein FlIT                                                 |
| 2030723 | A | A | C | C | C | C | C | STM1963    | <i>amyA</i> | cytoplasmic alpha-amylase                                                           |
| 2032535 | C | C | A | C | C | C | C | STM1963    | <i>amyA</i> | cytoplasmic alpha-amylase                                                           |
| 2034141 | C | C | C | C | C | C | A | STM1965    | <i>yedE</i> | putative inner membrane protein                                                     |
| 2035537 | T | T | T | C | T | T | T | STM1979    | <i>fliP</i> | flagellar biosynthesis protein FlIP                                                 |
| 2035593 | G | G | G | A | A | G | G | STM1982    | <i>rcsA</i> | colanic acid capsular biosynthesis activation protein A                             |
| 2037109 | C | C | G | G | G | G | G | STM1986    | <i>yedP</i> | mannosyl-3-phosphoglycerate phosphatase                                             |
| 2040642 | G | G | G | G | G | G | A | STM1987    | -           | putative inner membrane protein                                                     |
| 2047552 | C | C | C | C | C | C | T | STM1995    | <i>ompS</i> | putative porin                                                                      |
| 2048380 | C | C | T | C | C | C | C | STM2008    | -           | putative periplasmic protein                                                        |
| 2051354 | G | G | G | G | C | G | G | STM2011.1n | -           | hypothetical protein                                                                |
| 2052884 | G | G | A | G | G | G | G | STM2013    | <i>yeeO</i> | hypothetical protein                                                                |
| 2053069 | A | A | A | A | T | A | A | STM2015    | <i>erfK</i> | hypothetical protein<br>nicotinate-nucleotide--dimethylbenzimidazole                |
| 2053660 | C | C | C | C | T | C | C | STM2016    | <i>cobT</i> | phosphoribosyltransferase<br>adenosylcobinamide kinase/adenosylcobinamide-phosphate |
| 2054606 | G | G | G | G | A | G | G | STM2018    | <i>cobU</i> | guanylyltransferase                                                                 |
| 2055379 | C | C | T | T | T | T | T | STM2020    | <i>cbiO</i> | cobalt transporter ATP-binding subunit                                              |
| 2062982 | G | G | G | G | G | G | A | STM2022    | <i>cbiN</i> | cobalt transport protein CbiN                                                       |
| 2065664 | C | C | C | C | C | C | T | STM2030    | <i>cbiT</i> | cobalt-precorrin-6Y C(15)-methyltransferase                                         |
| 2067721 | A | A | A | A | A | C | A | STM2032    | <i>cbiD</i> | cobalt-precorrin-6A synthase                                                        |
| 2069338 | G | G | G | G | G | A | G | STM2032    | <i>cbiD</i> | cobalt-precorrin-6A synthase                                                        |
| 2070890 | G | G | G | G | G | G | C | STM2035    | <i>cbiA</i> | cobyrinic acid a,c-diamide synthase                                                 |
| 2077341 | A | A | C | C | C | C | C | STM2041    | <i>pduD</i> | propanediol dehydratase medium subunit                                              |
| 2078230 | G | G | G | G | C | G | G | STM2046    | <i>pduK</i> | polyhedral body protein                                                             |
| 2083488 | A | A | C | C | C | C | C |            |             |                                                                                     |
| 2084385 | G | G | T | G | G | G | G |            |             |                                                                                     |
| 2089975 | G | G | T | G | G | G | G |            |             |                                                                                     |
| 2090521 | A | A | A | G | A | A | A |            |             |                                                                                     |
| 2094081 | C | C | T | T | T | T | T |            |             |                                                                                     |
| 2094970 | C | C | T | C | C | C | C |            |             |                                                                                     |
| 2096138 | G | G | G | A | A | A | A |            |             |                                                                                     |
| 2096642 | G | G | G | A | G | G | G |            |             |                                                                                     |
| 2097684 | G | G | A | G | G | G | G |            |             |                                                                                     |
| 2099474 | T | T | G | T | T | T | T |            |             |                                                                                     |
| 2101442 | T | T | G | G | G | G | G |            |             |                                                                                     |
| 2102871 | T | T | T | T | T | T | C |            |             |                                                                                     |
| 2108781 | G | A | G | G | G | G | G |            |             |                                                                                     |
| 2110038 | A | A | A | A | A | A | C |            |             |                                                                                     |
| 2110162 | C | C | C | C | C | G | C |            |             |                                                                                     |
| 2113543 | C | C | T | C | C | C | C |            |             |                                                                                     |
| 2116472 | A | A | A | A | A | T | A |            |             |                                                                                     |
| 2120298 | G | G | G | G | A | G | G |            |             |                                                                                     |
| 2123545 | T | T | C | C | C | C | C |            |             |                                                                                     |

|         |   |   |   |   |   |   |   |            |             |                                                              |
|---------|---|---|---|---|---|---|---|------------|-------------|--------------------------------------------------------------|
| 2123666 | T | T | T | T | T | C | T | STM2046    | <i>pduK</i> | polyhedral body protein                                      |
| 2124041 | G | G | G | G | G | A | G | STM2047    | <i>pduL</i> | propanediol utilization protein                              |
| 2130352 | G | G | G | A | G | G | G | STM2054    | <i>pduT</i> | polyhedral body protein                                      |
| 2130370 | A | A | G | A | A | A | A | STM2054    | <i>pduT</i> | polyhedral body protein                                      |
| 2135887 | T | T | T | T | C | T | T |            |             |                                                              |
| 2135902 | G | G | G | G | G | G | T |            |             |                                                              |
| 2137757 | A | A | A | C | C | C | C | STM2063    | <i>phsC</i> | thiosulfate reductase cytochrome B subunit                   |
| 2140960 | C | C | C | C | A | C | C |            |             |                                                              |
| 2142134 | A | A | A | A | A | A | G | STM2066    | <i>sopA</i> | secreted effector protein                                    |
| 2147801 | A | A | G | G | G | A | G | STM2069    | <i>yeeY</i> | putative transcriptional regulator                           |
| 2148762 | G | G | G | G | G | G | T | STM2070    | <i>yeeZ</i> | putative dehydratase                                         |
| 2149820 | T | T | T | T | T | C | T | STM2071    | <i>hisG</i> | ATP phosphoribosyltransferase                                |
| 2156113 | G | G | G | G | A | G | G | STM2077    | <i>hisF</i> | imidazole glycerol phosphate synthase subunit HisF           |
| 2167502 | A | A | G | A | A | A | A |            |             |                                                              |
| 2167964 | T | T | C | T | T | T | T | STM2087    | <i>rfbV</i> | abequosyltransferase                                         |
| 2168225 | G | G | A | G | G | G | G | STM2087    | <i>rfbV</i> | abequosyltransferase                                         |
| 2169801 | C | C | T | T | T | T | T | STM2088    | <i>rfbX</i> | putative O-antigen transferase                               |
| 2177518 | G | A | G | G | G | G | G | STM2097    | <i>rfbB</i> | dTDP-glucose 4,6 dehydratase                                 |
| 2184325 | A | A | A | A | A | G | A | STM2102    | <i>wzxC</i> | colanic acid exporter                                        |
| 2187677 | C | C | C | C | T | C | C | STM2104    | <i>cpsG</i> | phosphomannomutase                                           |
| 2188242 | G | G | G | A | G | G | G | STM2104    | <i>cpsG</i> | phosphomannomutase                                           |
| 2189080 | C | C | C | C | T | C | C | STM2105.S  | <i>manC</i> | mannose-1-phosphate guanylyltransferase                      |
| 2190240 | A | A | A | A | A | G | A | STM2106    | <i>wcaI</i> | putative glycosyl transferase                                |
| 2191362 | T | T | T | T | T | T | C | STM2107    | <i>wcaH</i> | GDP-mannose mannosyl hydrolase                               |
| 2191404 | G | G | A | G | G | G | G | STM2107    | <i>wcaH</i> | GDP-mannose mannosyl hydrolase                               |
| 2191550 | C | C | C | C | C | C | T | STM2107    | <i>wcaH</i> | GDP-mannose mannosyl hydrolase                               |
| 2194910 | C | C | T | T | T | T | T | STM2111    | <i>wcaE</i> | putative glycosyl transferase                                |
| 2204926 | T | T | C | C | C | C | C |            |             |                                                              |
| 2208952 | A | A | G | G | G | G | G | STM2123    | <i>yegE</i> | putative diguanylate cyclase/phosphodiesterase               |
| 2210753 | G | G | G | A | G | G | G | STM2123    | <i>yegE</i> | putative diguanylate cyclase/phosphodiesterase               |
| 2212755 | G | G | G | G | G | G | A | STM2125    | <i>yegD</i> | putative chaperone                                           |
| 2214143 | C | A | C | C | C | C | C |            |             |                                                              |
| 2219136 | G | G | A | G | G | G | G | STM2128    | <i>yegO</i> | multidrug efflux system subunit MdtC                         |
| 2219610 | G | G | A | A | A | A | A | STM2128    | <i>yegO</i> | multidrug efflux system subunit MdtC                         |
| 2223484 | A | A | G | G | G | G | G | STM2130    | <i>baeS</i> | signal transduction histidine-protein kinase BaeS            |
| 2224295 | T | T | T | T | T | T | C | STM2130    | <i>baeS</i> | signal transduction histidine-protein kinase BaeS            |
| 2227675 | G | G | G | G | G | G | A | STM2135    | -           | putative inner membrane protein                              |
| 2228198 | G | G | G | G | G | T | G | STM2135    | -           | putative inner membrane protein                              |
| 2233063 | T | T | C | C | C | C | C |            |             |                                                              |
| 2233222 | G | A | G | G | G | G | G | STM2139    | -           | putative inner membrane protein                              |
| 2233224 | C | C | C | T | C | C | C | STM2139    | -           | putative inner membrane protein                              |
| 2245590 | C | C | C | C | C | C | T | STM2150    | <i>stcC</i> | putative outer membrane protein                              |
| 2246408 | T | T | T | T | T | T | T | STM2151    | <i>stcB</i> | putative periplasmic chaperone protein                       |
| 2250050 | C | C | C | C | C | A | C | STM2155    | <i>metG</i> | methionyl-tRNA synthetase                                    |
| 2252448 | G | G | G | G | G | G | A | STM2156    | <i>yehR</i> | putative lipoprotein                                         |
| 2253935 | G | G | A | G | G | G | G | STM2158    | <i>yehT</i> | putative two-component response-regulatory protein YehT      |
| 2255075 | G | G | T | G | G | G | G | STM2159    | <i>yehU</i> | putative sensor kinase                                       |
| 2256194 | G | G | G | A | A | A | A |            |             | putative ABC-type proline/glycine betaine transport system   |
| 2258915 | G | G | G | G | A | G | G | STM2164    | <i>yehY</i> | permease component                                           |
| 2259118 | A | A | G | A | A | A | A | STM2164    | <i>yehY</i> | permease component                                           |
| 2260019 | A | A | A | A | A | G | A | STM2164    | <i>yehY</i> | permease component                                           |
| 2261851 | G | G | A | G | G | G | G | STM2166    | <i>bgIX</i> | periplasmic beta-D-glucoside glucohydrolase                  |
| 2261930 | C | T | C | C | C | C | C | STM2166    | <i>bgIX</i> | periplasmic beta-D-glucoside glucohydrolase                  |
| 2263075 | C | C | C | C | T | C | C | STM2166    | <i>bgIX</i> | periplasmic beta-D-glucoside glucohydrolase                  |
| 2269176 | C | C | C | C | C | C | T | STM2172    | <i>yohG</i> | multidrug resistance outer membrane protein MdtQ             |
| 2276875 | A | A | T | A | A | A | A |            |             |                                                              |
| 2279715 | T | T | T | T | C | T | T | STM2183    | <i>cdd</i>  | cytidine deaminase                                           |
| 2280219 | T | T | T | T | C | T | T |            |             |                                                              |
| 2285729 | C | C | C | C | C | A | C | STM2189    | <i>mgIA</i> | galactose/methyl galactoside transporter ATP-binding protein |
| 2286684 | G | G | G | A | G | G | G | STM2190    | <i>mgIB</i> | galactose transport protein                                  |
| 2288684 | C | C | C | C | T | C | C | STM2191    | <i>galS</i> | DNA-binding transcriptional regulator GalS                   |
| 2289745 | G | G | G | G | T | G | G | STM2192    | <i>yehI</i> | hypothetical protein                                         |
| 2292650 | A | A | G | G | G | G | G | STM2195    | -           | putative transcriptional regulator                           |
| 2292679 | T | T | T | G | T | T | T |            |             |                                                              |
| 2294960 | G | G | A | G | G | G | G | STM2197    | -           | putative phosphoserine phosphatase                           |
| 2300302 | G | G | G | G | G | T | G | STM2200    | <i>lysP</i> | lysine transporter                                           |
| 2301558 | T | T | C | C | C | C | C | STM2202    | <i>yehH</i> | putative inner membrane protein                              |
| 2310555 | C | C | T | C | C | C | C |            |             |                                                              |
| 2310867 | C | C | C | A | C | C | C | STM2211.S  | <i>yehP</i> | elongation factor P                                          |
| 2311464 | G | A | G | G | G | G | G |            |             |                                                              |
| 2317914 | C | C | T | T | T | T | T | STM2216    | <i>yehA</i> | putative ABC transporter periplasmic binding protein         |
| 2320062 | C | C | C | C | C | C | A | STM2218    | <i>yehE</i> | permease component                                           |
| 2327212 | A | G | A | A | A | A | A | STM2225    | -           | putative inner membrane protein                              |
| 2330464 | C | C | C | C | C | T | C | STM2228    | <i>yehM</i> | putative hydrolase                                           |
| 2331390 | C | C | C | G | G | G | G | STM2230.1c | -           | DNA polymerase V subunit                                     |
| 2333632 | C | C | C | C | C | C | T | STM2232    | <i>oafA</i> | O-antigen acetylase                                          |
| 2334940 | G | G | G | G | A | G | G | STM2234    | -           | putative phage tail fiber assembly protein                   |
| 2335806 | G | G | G | G | A | G | G | STM2235    | -           | hypothetical protein                                         |

|         |   |   |   |   |   |   |   |   |           |              |                                                                                                  |
|---------|---|---|---|---|---|---|---|---|-----------|--------------|--------------------------------------------------------------------------------------------------|
| 2338686 | G | T | G | G | G | G | G |   | STM2238   | -            | hypothetical protein                                                                             |
| 2339590 | G | G | G | G | G | G | G | A | STM2240   | -            | putative cytoplasmic protein                                                                     |
| 2340946 | A | A | A | A | T | A | A | A | STM2241   | <i>sspH2</i> | leucine-rich repeat-containing protein                                                           |
| 2341776 | A | A | A | A | A | A | A | G | STM2241   | <i>sspH2</i> | leucine-rich repeat-containing protein                                                           |
| 2342912 | C | C | C | C | C | C | C | A | STM2241   | <i>sspH2</i> | leucine-rich repeat-containing protein                                                           |
| 2354256 | C | C | C | C | A | C | C |   | STM2255   | <i>napC</i>  | cytochrome c-type protein NapC                                                                   |
| 2355055 | T | T | T | T | T | T | T | G | STM2257   | <i>napH</i>  | quinol dehydrogenase membrane component                                                          |
| 2356160 | T | T | C | C | C | C | C | C | STM2258   | <i>napG</i>  | quinol dehydrogenase periplasmic component                                                       |
| 2357045 | C | C | C | G | G | C | C |   | STM2259   | <i>napA</i>  | nitrate reductase catalytic subunit                                                              |
| 2359039 | C | C | C | C | C | C | C | T | STM2260   | <i>napD</i>  | assembly protein for periplasmic nitrate reductase                                               |
| 2359409 | G | G | A | G | G | G | G | G | STM2261   | <i>napF</i>  | ferredoxin-type protein                                                                          |
| 2359975 | A | A | A | A | A | A | A | G |           |              |                                                                                                  |
| 2368441 | C | C | C | C | C | A | C |   | STM2269   | <i>yojN</i>  | phosphotransfer intermediate protein in two-component regulatory system with RcsBC               |
| 2370614 | T | T | C | C | C | C | C |   | STM2270   | <i>rcsB</i>  | transcriptional regulator RcsB                                                                   |
| 2376089 | C | T | C | C | C | C | C |   | STM2272   | <i>gyrA</i>  | DNA gyrase subunit A                                                                             |
| 2376100 | G | A | G | G | G | G | G |   | STM2272   | <i>gyrA</i>  | DNA gyrase subunit A                                                                             |
| 2376488 | T | T | C | C | C | C | C |   |           |              |                                                                                                  |
| 2380402 | T | G | T | T | T | T | T |   | STM2276   | <i>ubiG</i>  | 3-demethylubiquinone-9-3-methyltransferase                                                       |
| 2383166 | G | G | G | G | T | G | G |   | STM2277   | <i>nrdA</i>  | ribonucleotide-diphosphate reductase subunit alpha                                               |
| 2385484 | C | C | C | C | C | C | G |   | STM2280   | -            | putative permease                                                                                |
| 2390185 | C | C | C | A | A | A | A |   |           |              |                                                                                                  |
| 2390879 | G | G | G | G | G | A | G |   | STM2284   | <i>glpA</i>  | sn-glycerol-3-phosphate dehydrogenase subunit A                                                  |
| 2392178 | G | G | T | G | G | G | G |   | STM2285   | <i>glpB</i>  | anaerobic glycerol-3-phosphate dehydrogenase subunit B                                           |
| 2394751 | A | A | A | A | G | A | A |   |           |              |                                                                                                  |
| 2399139 | T | T | T | G | T | T | T |   | STM2291   | <i>yfaW</i>  | putative galactonate dehydratase                                                                 |
| 2402527 | C | A | C | C | C | C | C |   |           |              |                                                                                                  |
| 2406621 | C | C | C | T | C | C | C |   | STM2299   | <i>yfbG</i>  | bifunctional UDP-glucuronic acid decarboxylase/UDP-4-amino-4-deoxy-L-arabinose formyltransferase |
| 2408881 | T | T | T | T | T | T | G |   | STM2300   | -            | putative cytoplasmic protein                                                                     |
| 2413094 | G | G | G | G | G | G | A |   | STM2306   | <i>menC</i>  | O-succinylbenzoate synthase                                                                      |
| 2413556 | C | C | C | C | C | T | C |   | STM2306   | <i>menC</i>  | O-succinylbenzoate synthase                                                                      |
| 2417681 | G | G | T | G | G | G | G |   | STM2310   | <i>menF</i>  | menaquinone-specific isochorismate synthase                                                      |
| 2419201 | G | G | A | G | G | G | G |   | STM2312   | <i>elaA</i>  | hypothetical protein                                                                             |
| 2419206 | C | C | C | C | C | C | T |   | STM2312   | <i>elaA</i>  | hypothetical protein                                                                             |
| 2420280 | G | G | G | G | G | A | G |   | STM2313   | <i>elaC</i>  | ribonuclease Z                                                                                   |
| 2423708 | G | G | G | G | G | A | G |   |           |              |                                                                                                  |
| 2425105 | G | G | G | A | A | A | A |   | STM2316.S | <i>nuoN</i>  | NADH dehydrogenase subunit N                                                                     |
| 2427979 | C | G | G | G | G | G | G |   | STM2318   | <i>nuoL</i>  | NADH dehydrogenase subunit L                                                                     |
| 2428886 | G | G | G | A | G | G | G |   | STM2318   | <i>nuoL</i>  | NADH dehydrogenase subunit L                                                                     |
| 2429197 | A | A | G | G | G | G | G |   | STM2318   | <i>nuoL</i>  | NADH dehydrogenase subunit L                                                                     |
| 2431244 | T | T | C | C | C | C | C |   | STM2322   | <i>nuoH</i>  | NADH dehydrogenase subunit H                                                                     |
| 2435407 | G | G | G | A | G | G | G |   | STM2324   | <i>nuoF</i>  | NADH dehydrogenase I subunit F                                                                   |
| 2440328 | C | C | T | C | C | C | C |   | STM2330   | <i>lrhA</i>  | NADH dehydrogenase transcriptional repressor                                                     |
| 2441275 | T | T | G | G | G | G | G |   |           |              |                                                                                                  |
| 2441640 | C | C | C | C | C | C | T |   |           |              |                                                                                                  |
| 2444770 | G | G | T | G | G | G | G |   | STM2333   | <i>yfbS</i>  | putative response regulator                                                                      |
| 2446575 | T | T | A | T | T | T | T |   | STM2335   | <i>yfbU</i>  | hypothetical protein                                                                             |
| 2454136 | G | G | G | A | G | G | G |   | STM2341   | -            | putative transketolase                                                                           |
| 2461433 | G | G | A | G | G | G | G |   | STM2350   | <i>yfcH</i>  | putative sugar nucleotide epimerase                                                              |
| 2463340 | C | C | C | C | C | C | T |   | STM2352   | <i>hisM</i>  | histidine/lysine/arginine/ornithine transport protein                                            |
| 2465452 | T | T | T | G | G | G | G |   |           |              |                                                                                                  |
| 2466224 | G | G | G | G | G | G | T |   | STM2355   | <i>argT</i>  | lysine/arginine/ornithine transport protein                                                      |
| 2467952 | A | A | G | G | G | G | G |   | STM2357   | -            | putative amino acid transporter                                                                  |
| 2468486 | C | C | C | C | G | C | C |   | STM2357   | -            | putative amino acid transporter                                                                  |
| 2473030 | C | C | C | C | C | T | C |   | STM2361   | -            | putative regulatory protein                                                                      |
| 2473561 | G | G | G | G | G | G | A |   | STM2361   | -            | putative regulatory protein                                                                      |
| 2475937 | A | A | A | C | A | A | A |   | STM2363   | <i>cvpA</i>  | colicin V production protein                                                                     |
| 2478628 | A | A | C | C | C | C | C |   |           |              |                                                                                                  |
| 2479059 | C | C | C | C | C | C | T |   | STM2366   | <i>accD</i>  | acetyl-CoA carboxylase subunit beta                                                              |
| 2483421 | G | G | G | T | G | G | G |   | STM2370   | <i>pdxB</i>  | erythronate-4-phosphate dehydrogenase                                                            |
| 2484469 | T | T | G | T | T | T | T |   | STM2371   | <i>flk</i>   | flagella biosynthesis regulator                                                                  |
| 2485260 | A | A | A | A | A | A | A |   | STM2372   | -            | hypothetical protein                                                                             |
| 2500654 | C | G | G | G | G | G | G |   | STM2389   | <i>fadL</i>  | 3-ketoacyl-CoA thiolase                                                                          |
| 2500655 | G | C | C | C | C | C | C |   | STM2389   | <i>fadL</i>  | 3-ketoacyl-CoA thiolase                                                                          |
| 2502198 | C | C | A | C | C | C | C |   |           |              |                                                                                                  |
| 2503219 | A | A | G | G | G | G | G |   | STM2391   | <i>fadL</i>  | long-chain fatty acid outer membrane transporter                                                 |
| 2505071 | A | A | G | G | G | G | G |   | STM2393   | <i>yfdC</i>  | hypothetical protein                                                                             |
| 2506832 | G | G | G | G | G | A | G |   | STM2395   | <i>pgtE</i>  | outer membrane protease                                                                          |
| 2507049 | G | G | G | G | G | G | A |   |           |              |                                                                                                  |
| 2509974 | G | G | G | G | G | T | G |   | STM2397   | <i>pgtB</i>  | phosphoglycerate transport system sensor protein                                                 |
| 2511317 | C | C | C | C | C | C | T |   | STM2398   | <i>pgtC</i>  | phosphoglycerate transport regulatory protein precursor                                          |
| 2513257 | A | A | G | G | G | G | G |   | STM2399   | <i>pgtP</i>  | transporter                                                                                      |
| 2513575 | C | T | C | C | C | C | C |   |           |              |                                                                                                  |
| 2518417 | A | A | A | A | A | A | A |   | STM2403   | <i>glk</i>   | glucokinase                                                                                      |
| 2518834 | C | C | T | C | C | C | C |   | STM2403   | <i>glk</i>   | glucokinase                                                                                      |
| 2520189 | T | T | T | T | T | G | T |   | STM2404   | -            | hypothetical protein                                                                             |
| 2520622 | G | G | G | G | G | A | G |   | STM2405   | -            | indolepyruvate decarboxylase                                                                     |
| 2521161 | C | C | C | C | C | T | C |   | STM2405   | -            | indolepyruvate decarboxylase                                                                     |
| 2525573 | T | T | T | T | T | T | C |   | STM2409   | <i>nupC</i>  | nucleoside transport                                                                             |
| 2528800 | C | C | C | C | T | C | C |   |           |              |                                                                                                  |

|         |   |   |   |   |   |   |   |         |             |                                                      |
|---------|---|---|---|---|---|---|---|---------|-------------|------------------------------------------------------|
| 2529829 | T | T | T | T | T | T | C | STM2414 | <i>yfeD</i> | putative negative regulator                          |
| 2533021 | C | C | C | C | C | C | T | STM2420 | <i>xapR</i> | DNA-binding transcriptional activator XapR           |
| 2533918 | C | C | T | C | C | C | C | STM2421 | <i>xapB</i> | xanthosine permease                                  |
| 2535401 | C | C | C | C | C | T | C |         |             |                                                      |
| 2535477 | T | T | C | C | C | C | C |         |             |                                                      |
| 2537941 | C | G | G | G | G | G | G | STM2425 | <i>yfeH</i> | putative Na <sup>+</sup> -dependent transporter      |
| 2537942 | G | C | C | C | C | C | C | STM2425 | <i>yfeH</i> | putative Na <sup>+</sup> -dependent transporter      |
| 2540863 | G | G | G | G | A | G | G | STM2427 | <i>ligA</i> | NAD-dependent DNA ligase LigA                        |
| 2541905 | A | A | A | T | T | T | T | STM2428 | <i>zipA</i> | cell division protein ZipA                           |
| 2543500 | G | G | A | G | G | G | G | STM2430 | <i>cysK</i> | cysteine synthase A                                  |
| 2547739 | C | C | T | C | C | C | C | STM2435 | <i>pdxK</i> | pyridoxal kinase                                     |
| 2547787 | C | C | C | C | C | C | T | STM2435 | <i>pdxK</i> | pyridoxal kinase                                     |
| 2550665 | C | G | G | G | G | G | G | STM2438 | <i>yfeK</i> | hypothetical protein                                 |
| 2550666 | G | C | C | C | C | C | C | STM2438 | <i>yfeK</i> | hypothetical protein                                 |
| 2552605 | A | A | G | G | G | G | G |         |             |                                                      |
| 2558758 | C | C | C | C | C | C | T | STM2447 | -           | hypothetical protein                                 |
| 2560309 | C | C | C | C | A | C | C |         |             |                                                      |
| 2561061 | C | C | C | C | A | C | C |         |             |                                                      |
| 2563057 | G | G | G | G | G | A | G | STM2450 | <i>amiA</i> | N-acetylmuramoyl-L-alanine amidase I                 |
| 2564038 | C | C | T | C | C | C | C | STM2453 | -           | putative cytoplasmic protein                         |
| 2565407 | G | G | C | G | G | G | G |         |             |                                                      |
| 2565589 | A | A | G | G | G | G | G | STM2455 | <i>eutK</i> | putative carboxysome structural protein              |
| 2576512 | T | T | T | T | T | T | G | STM2455 | <i>eutK</i> | putative carboxysome structural protein              |
| 2580125 | C | C | C | C | C | C | A | STM2466 | <i>eutD</i> | phosphotransacetylase                                |
| 2583315 | G | G | G | G | A | G | G | STM2472 | <i>maeB</i> | malic enzyme                                         |
| 2584636 | A | A | G | G | G | G | G | STM2473 | <i>talA</i> | transaldolase A                                      |
| 2584720 | C | C | C | T | C | C | C | STM2474 | <i>tktB</i> | transketolase                                        |
| 2584998 | T | T | T | C | C | C | C | STM2474 | <i>tktB</i> | transketolase                                        |
| 2585220 | G | G | A | G | G | G | G | STM2474 | <i>tktB</i> | transketolase                                        |
| 2585231 | C | C | C | C | C | C | A | STM2474 | <i>tktB</i> | transketolase                                        |
| 2585551 | G | G | A | G | G | G | G |         |             |                                                      |
| 2586108 | A | A | G | G | G | G | G | STM2476 | <i>ypfG</i> | putative periplasmic protein                         |
| 2590671 | A | A | G | G | G | G | G | STM2479 | <i>aegA</i> | putative oxidoreductase Fe-S binding subunit         |
| 2590854 | C | C | A | C | C | C | C | STM2479 | <i>aegA</i> | putative oxidoreductase Fe-S binding subunit         |
| 2591077 | C | C | C | C | C | C | T | STM2479 | <i>aegA</i> | putative oxidoreductase Fe-S binding subunit         |
| 2594861 | A | A | A | G | G | G | G | STM2481 | <i>acrD</i> | aminoglycoside/multidrug efflux system               |
| 2595441 | A | A | A | C | C | A | A | STM2481 | <i>acrD</i> | aminoglycoside/multidrug efflux system               |
| 2601697 | T | T | T | T | C | T | T | STM2486 | -           | putative inner membrane protein                      |
| 2614589 | C | C | T | C | C | C | C | STM2486 | -           | putative inner membrane protein                      |
| 2618816 | G | G | A | A | A | A | A | STM2500 | <i>purN</i> | phosphoribosylglycinamide formyltransferase          |
| 2620930 | G | G | G | G | T | G | G | STM2503 | -           | putative diguanylate cyclase                         |
| 2624168 | A | G | G | G | G | G | G |         |             |                                                      |
| 2627901 | A | A | G | G | G | G | G | STM2510 | <i>guaA</i> | GMP synthase                                         |
| 2629307 | G | G | G | G | G | A | G | STM2513 | <i>shdA</i> | AIDA autotransporter-like protein                    |
| 2632379 | A | A | A | A | A | T | A | STM2513 | <i>shdA</i> | AIDA autotransporter-like protein                    |
| 2633672 | G | G | G | A | G | G | G | STM2513 | <i>shdA</i> | AIDA autotransporter-like protein                    |
| 2633865 | A | A | G | A | A | A | A |         |             |                                                      |
| 2637463 | G | G | G | G | G | C | G | STM2514 | <i>ratB</i> | putative outer membrane protein                      |
| 2638509 | C | C | C | C | C | C | A | STM2514 | <i>ratB</i> | putative outer membrane protein                      |
| 2639741 | G | G | G | G | G | G | A | STM2514 | <i>ratB</i> | putative outer membrane protein                      |
| 2641514 | G | G | G | G | G | G | A | STM2514 | <i>ratB</i> | putative outer membrane protein                      |
| 2641554 | G | G | G | G | G | A | G | STM2514 | <i>ratB</i> | putative outer membrane protein                      |
| 2642351 | G | G | G | A | A | A | A | STM2514 | <i>ratB</i> | putative outer membrane protein                      |
| 2643093 | T | T | A | T | T | T | T | STM2515 | <i>ratA</i> | putative outer membrane protein                      |
| 2643606 | C | C | C | C | C | C | A | STM2515 | <i>ratA</i> | putative outer membrane protein                      |
| 2657220 | T | T | T | T | T | C | T | STM2515 | <i>ratA</i> | putative outer membrane protein                      |
| 2659303 | T | T | A | A | A | A | A | STM2523 | <i>ispG</i> | 4-hydroxy-3-methylbut-2-en-1-yl diphosphate synthase |
| 2661659 | G | C | C | C | C | C | C | STM2525 | <i>yfgB</i> | hypothetical protein                                 |
| 2662168 | C | C | C | C | C | C | T | STM2528 | -           | putative dimethylsulfoxide reductase                 |
| 2664465 | A | A | A | A | A | A | T | STM2528 | -           | putative dimethylsulfoxide reductase                 |
| 2667864 | G | G | G | G | G | G | A | STM2530 | -           | putative anaerobic dimethylsulfoxide reductase       |
| 2668958 | G | G | G | A | A | A | A | STM2532 | -           | putative inner membrane lipoprotein                  |
| 2673130 | T | T | T | T | T | C | T | STM2532 | -           | putative inner membrane lipoprotein                  |
| 2674612 | G | G | G | G | G | G | A | STM2533 | <i>sseA</i> | 3-mercaptopyruvate sulfurtransferase                 |
| 2681894 | T | T | T | T | T | T | C | STM2534 | -           | putative cytoplasmic protein                         |
| 2681944 | G | G | G | G | G | G | A | STM2543 | <i>nifS</i> | cysteine desulfurase                                 |
| 2682184 | T | T | T | T | T | C | T | STM2543 | <i>nifS</i> | cysteine desulfurase                                 |
| 2687938 | A | A | A | A | A | A | G | STM2543 | <i>nifS</i> | cysteine desulfurase                                 |
| 2690688 | G | G | G | A | A | G | G | STM2549 | <i>asrB</i> | anaerobic sulfite reductase subunit B                |
| 2695925 | C | C | C | C | C | C | T | STM2552 | -           | hypothetical protein                                 |
| 2695983 | G | T | T | T | T | T | T | STM2552 | -           | hypothetical protein                                 |
| 2696246 | T | T | G | G | G | G | G | STM2556 | <i>hmpA</i> | nitric oxide dioxygenase                             |
| 2698171 | A | A | A | A | A | A | C | STM2556 | <i>hmpA</i> | nitric oxide dioxygenase                             |
| 2698301 | G | G | G | G | G | G | A | STM2556 | <i>hmpA</i> | nitric oxide dioxygenase                             |
| 2698341 | A | A | C | C | C | C | C | STM2557 | <i>cadC</i> | DNA-binding transcriptional activator CadC           |
| 2701974 | C | C | C | C | C | C | T |         |             |                                                      |
| 2704353 | G | G | G | G | G | G | A | STM2559 | <i>cadA</i> | lysine decarboxylase 1                               |
| 2705384 | G | G | G | A | G | G | G | STM2562 | <i>yfhA</i> | putative transcriptional regulator                   |
| 2708004 | C | C | C | C | A | C | C | STM2562 | <i>yfhA</i> | putative transcriptional regulator                   |
| 2711140 | G | G | G | G | G | G | A |         |             |                                                      |
| 2712424 | T | T | T | C | T | T | T | STM2565 | <i>purG</i> | phosphoribosylformylglycinamide synthase             |
|         |   |   |   |   |   |   |   | STM2567 | <i>yfhD</i> | putative transglycosylase                            |

|         |   |   |   |   |   |   |   |         |             |                                                         |
|---------|---|---|---|---|---|---|---|---------|-------------|---------------------------------------------------------|
| 2715610 | G | G | G | G | G | G | T | STM2570 | -           | putative phosphotransferase system IIB component        |
| 2715924 | C | C | T | C | C | C | C | STM2570 | -           | putative phosphotransferase system IIB component        |
| 2716762 | G | G | G | G | G | G | T | STM2571 | <i>murQ</i> | N-acetylmuramic acid-6-phosphate etherase               |
| 2720067 | A | A | A | G | G | G | G | STM2574 | -           | putative permease                                       |
| 2721952 | C | T | C | C | C | C | C |         |             |                                                         |
| 2724018 | C | C | T | C | C | C | C |         |             |                                                         |
| 2726129 | A | A | G | G | G | G | G | STM2580 | <i>era</i>  | GTP-binding protein Era                                 |
| 2780666 | G | G | A | G | G | G | G | STM2582 | <i>lepB</i> | signal peptidase I                                      |
| 2783835 | G | G | G | G | G | G | T | STM2641 | <i>nadB</i> | L-aspartate oxidase                                     |
| 2788821 | G | G | G | A | A | A | A | STM2643 | <i>srmB</i> | ATP-dependent RNA helicase SrmB                         |
| 2789927 | G | G | A | G | G | G | G | STM2649 | <i>trxC</i> | thioredoxin 2                                           |
| 2795747 | T | C | T | T | T | T | T | STM2651 | <i>yfiQ</i> | putative acetyl-CoA synthetase                          |
| 2796138 | A | A | A | A | A | A | C | STM2655 | -           | putative cytoplasmic protein                            |
| 2803030 | C | C | C | C | C | C | T | STM2660 | <i>clpB</i> | protein disaggregation chaperone                        |
| 2803964 | C | T | C | C | C | C | C | STM2660 | <i>clpB</i> | protein disaggregation chaperone                        |
| 2806099 | C | A | C | C | C | C | C | STM2662 | <i>rluD</i> | 23S rRNA pseudouridine synthase D                       |
| 2810793 | A | A | A | A | A | A | T | STM2669 | <i>tyrA</i> | bifunctional chorismate mutase/prephenate dehydrogenase |
| 2811966 | G | G | G | G | G | G | A | STM2670 | <i>aroF</i> | phospho-2-dehydro-3-deoxyheptonate aldolase             |
| 2812647 | T | T | C | T | T | T | T |         |             |                                                         |
| 2817453 | T | T | T | T | T | T | C | STM2677 | <i>ffh</i>  | signal recognition particle protein                     |
| 2821355 | G | G | A | G | G | G | G | STM2680 | -           | putative cytoplasmic protein                            |
| 2823440 | G | A | G | G | G | G | G | STM2684 | <i>recN</i> | recombination and repair protein                        |
| 2823633 | C | C | C | C | C | C | C | STM2684 | <i>recN</i> | recombination and repair protein                        |
| 2825863 | C | C | C | C | C | C | A | STM2686 | <i>yjfJ</i> | hypothetical protein                                    |
| 2826432 | G | G | G | G | T | G | G |         |             |                                                         |
| 2827785 | A | A | A | A | C | A | A |         |             |                                                         |
| 2828278 | C | C | C | C | T | C | C |         |             |                                                         |
| 2828753 | G | G | G | A | A | A | A |         |             |                                                         |
| 2829374 | A | A | A | A | A | A | C |         |             |                                                         |
| 2830108 | A | A | G | G | G | G | G |         |             |                                                         |
| 2830916 | A | A | C | A | A | A | A |         |             |                                                         |
| 2832489 | C | C | C | C | T | C | C |         |             |                                                         |
| 2836699 | G | G | G | C | C | C | C |         |             |                                                         |
| 2839424 | G | G | G | G | G | G | G | STM2690 | -           | putative outer membrane efflux protein                  |
| 2840931 | G | G | G | G | G | G | T | STM2691 | -           | putative ABC transporter transmembrane region           |
| 2842909 | G | G | G | A | G | G | G | STM2692 | -           | HlyD family secretion protein                           |
| 2843257 | G | G | G | G | G | G | A | STM2692 | -           | HlyD family secretion protein                           |
| 2843936 | T | T | C | C | C | C | C |         |             |                                                         |
| 2879694 | G | G | A | G | G | G | G | STM2741 | -           | putative periplasmic protein                            |
| 2885696 | C | C | T | C | C | C | C |         |             |                                                         |
| 2888245 | G | G | G | G | G | G | A |         |             |                                                         |
| 2888294 | C | C | T | C | C | C | C |         |             |                                                         |
| 2891738 | G | G | T | G | G | G | G | STM2753 | -           | putative dehydrogenase                                  |
| 2892779 | G | G | G | T | G | G | G | STM2754 | -           | putative hexulose 6 phosphate synthase                  |
| 2894454 | A | A | G | G | G | G | G | STM2756 | -           | putative sugar phosphate aminotransferase               |
| 2896952 | G | G | G | A | A | G | G | STM2758 | -           | putative phosphotransferase system IIC component        |
| 2897121 | C | C | C | A | C | C | C | STM2758 | -           | putative phosphotransferase system IIC component        |
| 2899518 | A | A | G | G | G | G | G |         |             |                                                         |
| 2899632 | T | T | T | T | A | T | T |         |             |                                                         |
| 2899633 | T | T | T | T | A | T | T |         |             |                                                         |
| 2901350 | A | A | A | A | A | A | G |         |             |                                                         |
| 2901787 | C | C | C | C | C | C | T | STM2761 | -           | putative inner membrane protein                         |
| 2903088 | G | G | G | G | C | G | G | STM2761 | -           | putative inner membrane protein                         |
| 2905934 | G | G | G | A | A | A | A |         |             |                                                         |
| 2906853 | G | G | G | G | G | G | A |         |             |                                                         |
| 2907246 | C | C | T | C | C | C | C | STM2765 | -           | putative transposase                                    |
| 2910964 | C | C | A | C | C | C | C | STM2768 | -           | putative transposase                                    |
| 2912403 | C | C | C | C | C | T | C |         |             |                                                         |
| 2913677 | A | A | G | G | G | G | G | STM2771 | <i>fliB</i> | flagellin                                               |
| 2915715 | T | T | T | T | T | T | A |         |             |                                                         |
| 2917432 | G | G | G | G | A | G | G | STM2773 | <i>iroB</i> | putative glycosyl transferase                           |
| 2921028 | C | C | C | C | C | T | C | STM2774 | <i>iroC</i> | putative ABC transporter protein                        |
| 2921136 | G | G | G | T | G | G | G | STM2774 | <i>iroC</i> | putative ABC transporter protein                        |
| 2921235 | G | G | G | G | G | G | T |         |             |                                                         |
| 2923430 | C | C | T | C | C | C | C | STM2776 | <i>iroE</i> | putative hydrolase                                      |
| 2925309 | A | A | G | G | G | G | G | STM2777 | <i>iroN</i> | outer membrane receptor FepA                            |
| 2926210 | C | C | C | C | C | C | T |         |             |                                                         |
| 2926293 | C | C | C | C | C | C | C |         |             |                                                         |
| 2928483 | T | T | C | C | C | C | C | STM2781 | <i>virK</i> | virulence protein                                       |
| 2931759 | C | C | T | C | C | C | C | STM2783 | <i>nixA</i> | putative nickel transporter                             |
| 2937751 | G | G | G | A | G | G | G |         |             |                                                         |
| 2938278 | C | C | A | C | C | C | C | STM2789 | -           | hypothetical protein                                    |
| 2939015 | C | C | C | C | C | T | C | STM2790 | <i>ygaF</i> | hydroxyglutarate oxidase                                |
| 2940892 | A | A | G | G | G | G | G | STM2791 | <i>gabD</i> | succinate-semialdehyde dehydrogenase I                  |
| 2945099 | T | T | T | T | G | T | T | STM2794 | <i>ygaE</i> | DNA-binding transcriptional regulator CsiR              |
| 2946009 | A | G | A | A | A | A | A |         |             |                                                         |
| 2948018 | A | A | G | G | G | G | G |         |             |                                                         |
| 2950876 | T | T | T | A | A | T | T |         |             |                                                         |
| 2952081 | A | A | A | A | A | C | A | STM2803 | -           | putative regulatory protein                             |
| 2952421 | G | G | G | A | G | G | G | STM2805 | <i>nrdH</i> | glutaredoxin-like protein                               |
| 2952690 | G | G | G | G | G | G | A | STM2806 | <i>nrdI</i> | ribonucleotide reductase stimulatory protein            |
|         |   |   |   |   |   |   |   | STM2807 | <i>nrdE</i> | ribonucleotide-diphosphate reductase subunit alpha      |

|         |   |   |   |   |   |   |   |
|---------|---|---|---|---|---|---|---|
| 2954098 | G | G | G | G | G | T | G |
| 2957219 | G | G | G | G | G | A | G |
| 2960108 | C | C | C | C | C | C | T |
| 2961288 | G | G | G | G | G | A | G |
| 2964207 | C | C | C | C | C | C | A |
| 2967926 | C | T | C | C | C | C | C |
| 2976451 | G | G | G | G | G | G | A |
| 2976538 | C | C | C | C | C | C | T |
| 2979237 | C | C | C | C | C | C | G |
| 2983237 | C | C | C | A | A | A | A |
| 2983684 | G | G | G | G | G | G | A |
| 2985196 | A | A | A | A | A | A | G |
| 2985328 | C | C | C | C | C | T | C |
| 2985352 | G | G | G | T | T | T | T |
| 2991947 | C | C | C | C | C | A | C |
| 2992399 | G | G | G | G | G | G | A |
| 2996778 | C | G | G | G | G | G | G |
| 2996779 | G | C | C | C | C | C | C |
| 3000993 | G | G | A | G | G | G | G |
| 3001171 | A | A | T | A | A | A | A |
| 3005617 | A | A | C | C | C | C | C |
| 3006427 | G | G | G | G | G | G | T |
| 3010824 | T | T | C | C | C | C | C |
| 3012559 | C | T | C | C | C | C | C |
| 3013468 | C | C | T | C | C | C | C |
| 3015966 | C | C | C | C | C | C | T |
| 3019004 | G | G | G | T | T | T | T |
| 3025770 | G | G | G | A | G | G | G |
| 3029704 | C | C | C | C | C | C | T |
| 3037770 | T | A | T | T | T | T | T |
| 3039255 | G | G | G | G | G | T | G |
| 3040504 | C | C | C | C | C | C | T |
| 3052754 | C | C | A | C | C | C | C |
| 3055765 | A | A | G | G | G | G | G |
| 3055950 | A | A | G | G | G | G | G |
| 3056329 | A | A | G | G | G | G | G |
| 3056347 | T | T | A | A | A | A | A |
| 3059163 | C | C | C | T | T | T | T |
| 3059472 | G | G | G | G | G | A | G |
| 3059660 | C | C | C | T | T | C | C |
| 3061697 | G | G | G | A | G | G | G |
| 3063978 | T | T | T | T | T | T | C |
| 3064925 | T | T | G | T | T | T | T |
| 3066486 | A | T | T | T | T | T | T |
| 3079061 | A | A | A | C | C | C | C |
| 3079665 | G | A | A | G | G | G | G |
| 3079837 | G | G | A | G | G | G | G |
| 3086563 | G | G | G | G | G | G | A |
| 3086589 | C | C | C | C | A | C | C |
| 3090184 | C | C | C | C | C | T | C |
| 3093568 | C | C | A | A | A | A | A |
| 3095499 | G | G | G | G | G | G | T |
| 3096598 | T | T | G | G | G | G | G |
| 3097053 | G | G | A | G | G | G | G |
| 3097670 | G | G | A | G | T | G | G |
| 3110314 | C | C | C | C | C | C | T |
| 3110627 | C | C | C | C | A | C | C |
| 3112160 | G | G | G | G | G | G | T |
| 3116518 | C | C | T | T | T | T | T |
| 3119237 | G | G | G | A | A | A | A |
| 3120407 | T | T | T | T | T | C | C |
| 3122772 | C | C | C | C | C | C | A |
| 3122883 | C | C | C | C | C | C | T |
| 3127204 | G | G | G | T | T | T | T |
| 3130701 | G | G | G | G | G | G | A |
| 3133164 | C | C | C | C | C | C | T |
| 3134944 | T | T | T | T | T | T | C |
| 3139107 | C | C | C | C | G | C | C |
| 3140874 | G | G | G | G | A | G | G |
| 3141410 | C | C | C | C | T | C | C |
| 3142791 | C | C | T | C | C | C | C |
| 3144590 | A | A | C | A | A | A | A |
| 3149721 | C | C | T | C | C | C | C |
| 3154019 | C | G | G | G | G | G | G |
| 3154020 | G | C | C | C | C | C | C |
| 3160341 | C | A | C | C | C | C | C |
| 3160598 | G | G | G | A | A | A | A |
| 3167119 | G | G | G | G | G | A | G |
| 3167375 | C | C | C | C | T | C | C |

|           |             |                                                                      |
|-----------|-------------|----------------------------------------------------------------------|
| STM2807   | <i>nrdE</i> | ribonucleotide-diphosphate reductase subunit alpha                   |
| STM2810   | <i>proW</i> | glycine betaine transporter membrane protein                         |
| STM2812   | -           | putative inner membrane protein                                      |
| STM2813   | <i>emrR</i> | transcriptional repressor MprA                                       |
| STM2815   | <i>emrB</i> | putative multidrug transport protein                                 |
| STM2818   | <i>gshA</i> | glutamate--cysteine ligase                                           |
| STM2830   | <i>ygaD</i> | competence damage-inducible protein A                                |
| STM2833   | <i>srlE</i> | glucitol/sorbitol-specific enzyme IIB component                      |
| STM2838.S | <i>gutQ</i> | D-arabinose 5-phosphate isomerase                                    |
| STM2839   | <i>ygaA</i> | anaerobic nitric oxide reductase transcription regulator             |
| STM2840   | -           | anaerobic nitric oxide reductase flavorubredoxin                     |
| STM2840   | -           | anaerobic nitric oxide reductase flavorubredoxin                     |
| STM2840   | -           | anaerobic nitric oxide reductase flavorubredoxin                     |
| STM2845   | <i>hycl</i> | hydrogenase 3 maturation protease                                    |
| STM2846   | <i>hych</i> | hydrogenase 3 large subunit processing protein                       |
| STM2851   | <i>hycC</i> | formate hydrogenlyase subunit 3                                      |
| STM2851   | <i>hycC</i> | formate hydrogenlyase subunit 3                                      |
| STM2855   | <i>hypB</i> | hydrogenase nickel incorporation protein HypB                        |
| STM2856   | <i>hypC</i> | hydrogenase assembly chaperone                                       |
| STM2859   | <i>fhlA</i> | formate hydrogen-lyase transcriptional activator                     |
| STM2861   | <i>sitA</i> | putative periplasmic binding protein                                 |
| STM2867   | <i>hilC</i> | invasion regulatory protein                                          |
| STM2868   | <i>orgC</i> | putative cytoplasmic protein                                         |
| STM2872   | <i>prgJ</i> | needle complex minor subunit                                         |
| STM2882   | <i>sipA</i> | secreted effector protein                                            |
| STM2885   | <i>sipB</i> | translocation machinery component                                    |
| STM2894   | <i>invC</i> | ATP synthase SpaL                                                    |
| STM2896   | <i>invA</i> | needle complex export protein                                        |
| STM2897   | <i>invE</i> | invasion protein                                                     |
| STM2909   | <i>mutS</i> | DNA mismatch repair protein MutS                                     |
| STM2913   | -           | putative permease                                                    |
| STM2916   | <i>ygbL</i> | putative aldolase                                                    |
| STM2917   | <i>ygbK</i> | putative tRNA synthase                                               |
| STM2917   | <i>ygbK</i> | putative tRNA synthase                                               |
| STM2922   | -           | putative 3-polypropenyl-4-hydroxybenzoate decarboxylase              |
| STM2922   | -           | putative 3-polypropenyl-4-hydroxybenzoate decarboxylase              |
| STM2924   | <i>rpoS</i> | RNA polymerase sigma factor RpoS                                     |
| STM2938   | -           | putative cytoplasmic protein                                         |
| STM2939   | <i>ygcH</i> | putative cytoplasmic protein                                         |
| STM2939   | <i>ygcH</i> | putative cytoplasmic protein                                         |
| STM2944   | <i>ygCB</i> | putative helicase                                                    |
| STM2944   | <i>ygCB</i> | putative helicase                                                    |
| STM2947   | <i>cysI</i> | sulfite reductase subunit beta                                       |
| STM2950   | -           | putative metal-dependent hydrolase                                   |
| STM2951   | <i>ygCF</i> | hypothetical protein                                                 |
| STM2951   | <i>ygCF</i> | hypothetical protein                                                 |
| STM2952   | <i>eno</i>  | phosphopyruvate hydratase                                            |
| STM2959   | -           | putative glycerate kinase 2                                          |
| STM2960   | <i>gudD</i> | d-glucarate dehydratase                                              |
| STM2961   | <i>ygCY</i> | putative D-glucarate dehydratase                                     |
| STM2965   | <i>ygQC</i> | putative cytoplasmic protein                                         |
| STM2969   | <i>ygDH</i> | putative nucleotide binding                                          |
| STM2971   | <i>sdaB</i> | L-serine dehydratase/L-threonine deaminase 2                         |
| STM2971   | <i>sdaB</i> | L-serine dehydratase/L-threonine deaminase 2                         |
| STM2977   | <i>fucK</i> | L-fuculokinase                                                       |
| STM2980   | <i>ygDE</i> | putative RNA 2'-O-ribose methyltransferase                           |
| STM2982   | <i>gcvA</i> | DNA-binding transcriptional activator GcvA                           |
| STM2987   | <i>ygDL</i> | putative enzyme                                                      |
| STM2991   | <i>amiC</i> | N-acetylmuramoyl-L-alanine amidase                                   |
| STM2993   | <i>recD</i> | exonuclease V subunit alpha                                          |
| STM2995   | <i>ptr</i>  | protease III                                                         |
| STM2996   | <i>recC</i> | exonuclease V subunit gamma                                          |
| STM2996   | <i>recC</i> | exonuclease V subunit gamma                                          |
| STM3003   | <i>ptsP</i> | fused phosphoenolpyruvate-protein phosphotransferase PtsP/GAF domain |
| STM3003   | <i>ptsP</i> | fused phosphoenolpyruvate-protein phosphotransferase PtsP/GAF domain |
| STM3003   | <i>ptsP</i> | domain                                                               |
| STM3009   | <i>ygeD</i> | lysophospholipid transporter LpIT                                    |
| STM3009   | <i>ygeD</i> | lysophospholipid transporter LpIT                                    |



|         |   |   |   |   |   |   |   |            |                                                                                          |
|---------|---|---|---|---|---|---|---|------------|------------------------------------------------------------------------------------------|
| 3170412 | A | A | A | A | A | A | C |            |                                                                                          |
| 3178899 | C | C | C | C | C | C | T | STM3018    | <i>kduI</i> 5-keto-4-deoxyuronate isomerase                                              |
| 3178958 | C | C | C | T | C | C | C | STM3018    | <i>kduI</i> 5-keto-4-deoxyuronate isomerase                                              |
| 3179295 | G | G | A | G | G | G | G |            |                                                                                          |
| 3179596 | C | C | C | C | C | C | T |            |                                                                                          |
| 3181796 | T | T | C | C | C | C | C | STM3020    | - putative transcriptional regulator                                                     |
| 3182918 | C | C | C | C | C | C | A | STM3022    | - putative transport protein                                                             |
| 3185984 | A | A | G | G | G | G | G | STM3025    | - putative cytoplasmic protein                                                           |
| 3186110 | C | C | C | C | A | C | C | STM3025.1N | - hypothetical protein                                                                   |
| 3187521 | C | C | C | C | C | A | C | STM3026    | - putative outer membrane protein                                                        |
| 3188690 | A | A | C | C | C | C | C | STM3028    | <i>stdB</i> putative outer membrane usher protein                                        |
| 3188898 | G | G | G | G | A | G | G | STM3028    | <i>stdB</i> putative outer membrane usher protein                                        |
| 3189347 | C | C | C | C | C | C | T | STM3028    | <i>stdB</i> putative outer membrane usher protein                                        |
| 3192155 | T | T | C | T | T | T | T |            |                                                                                          |
| 3193640 | T | T | T | T | T | T | C |            |                                                                                          |
| 3193667 | G | G | G | A | A | A | A |            |                                                                                          |
| 3196738 | A | A | G | A | A | A | A | STM3036    | - putative inner membrane protein                                                        |
| 3197389 | C | C | C | C | C | T | C |            |                                                                                          |
| 3199172 | G | G | G | G | A | G | G |            |                                                                                          |
| 3199810 | G | G | A | G | G | G | G | STM3040    | <i>lysS</i> lysyl-tRNA synthetase                                                        |
| 3211852 | C | C | T | C | C | C | C |            |                                                                                          |
| 3214949 | G | G | A | G | G | G | G | STM3053    | <i>gcvP</i> glycine dehydrogenase                                                        |
| 3214963 | T | T | T | T | T | T | C | STM3053    | <i>gcvP</i> glycine dehydrogenase                                                        |
| 3219132 | C | G | G | G | G | G | G | STM3057    | <i>ubiH</i> 2-octaprenyl-6-methoxyphenyl hydroxylase                                     |
| 3219133 | G | C | C | C | C | C | C | STM3057    | <i>ubiH</i> 2-octaprenyl-6-methoxyphenyl hydroxylase                                     |
| 3227308 | T | T | T | T | G | T | T | STM3065    | <i>yggE</i> hypothetical protein                                                         |
| 3228202 | C | C | C | C | C | C | T | STM3066    | <i>yggA</i> arginine exporter protein                                                    |
| 3228883 | C | C | C | C | C | C | A | STM3067    | <i>yggB</i> mechanosensitive channel MscS                                                |
| 3230295 | T | T | T | T | T | T | C | STM3068    | <i>jba</i> fructose-bisphosphate aldolase                                                |
| 3232996 | C | C | C | T | C | C | C |            |                                                                                          |
| 3234909 | T | T | T | G | T | T | T | STM3073    | - putative ABC-type cobalt transport system permease component                           |
| 3242909 | C | T | T | T | T | T | T | STM3081    | - putative malate/L-lactate dehydrogenase                                                |
| 3245034 | C | C | T | C | C | C | C | STM3083    | - putative mannitol dehydrogenase                                                        |
| 3245559 | G | G | A | G | G | G | G | STM3083    | - putative mannitol dehydrogenase                                                        |
| 3245958 | T | T | T | T | T | C | T |            |                                                                                          |
| 3248790 | A | A | A | C | C | C | C |            |                                                                                          |
| 3249039 | G | G | A | A | A | A | A | STM3086    | <i>speA</i> arginine decarboxylase                                                       |
| 3253161 | A | A | G | A | A | A | A |            |                                                                                          |
| 3257005 | G | G | T | G | G | G | G | STM3095    | <i>gshB</i> glutathione synthetase                                                       |
| 3258645 | G | G | G | G | G | G | A | STM3096    | <i>yggE</i> hypothetical protein                                                         |
| 3259904 | C | C | A | C | C | C | C |            |                                                                                          |
| 3263061 | C | C | C | C | C | C | A | STM3103    | <i>yggV</i> putative deoxyribonucleotide triphosphate pyrophosphatase                    |
| 3264056 | C | C | C | T | T | T | T | STM3104    | <i>yggW</i> coproporphyrinogen III oxidase                                               |
| 3270606 | C | C | C | C | A | C | C | STM3112    | <i>mltC</i> murein transglycosylase C                                                    |
| 3271644 | A | A | A | C | A | A | A | STM3113    | <i>nupG</i> nucleoside transport                                                         |
| 3273896 | C | C | C | C | C | C | T | STM3114    | <i>speC</i> ornithine decarboxylase                                                      |
| 3274223 | G | G | G | G | G | A | G | STM3114    | <i>speC</i> ornithine decarboxylase                                                      |
| 3274853 | T | T | C | T | T | T | T | STM3114    | <i>speC</i> ornithine decarboxylase                                                      |
| 3277442 | T | T | C | T | T | T | T | STM3118    | - putative acetyl-CoA hydrolase                                                          |
| 3278781 | G | G | G | G | G | T | G | STM3120    | - putative transcriptional regulator                                                     |
| 3279516 | A | A | G | A | A | A | A | STM3120    | - putative transcriptional regulator                                                     |
| 3280350 | G | G | G | G | G | G | A | STM3121    | - putative transcriptional regulator                                                     |
| 3281777 | C | C | A | C | C | C | C | STM3122    | - putative arylsulfatase                                                                 |
| 3286324 | A | A | C | C | C | C | C | STM3126    | - putative amino acid transporter                                                        |
| 3286531 | G | G | G | T | T | T | T | STM3126    | - putative amino acid transporter                                                        |
| 3291903 | G | G | G | G | T | G | G |            |                                                                                          |
| 3294569 | C | C | C | C | C | T | C | STM3134    | - putative permease                                                                      |
| 3295358 | G | G | G | G | G | G | A | STM3134    | - putative permease                                                                      |
| 3298019 | C | C | C | T | C | C | C | STM3136    | - putative D-mannonate oxidoreductase                                                    |
| 3299179 | T | T | C | T | T | T | T | STM3137    | - glucuronate isomerase                                                                  |
| 3300344 | T | T | T | T | T | T | C |            |                                                                                          |
| 3301720 | T | T | T | T | T | C | T |            |                                                                                          |
| 3301744 | C | C | C | C | C | C | A |            |                                                                                          |
| 3301971 | G | G | G | G | G | G | A |            |                                                                                          |
| 3303628 | G | G | G | T | G | G | G | STM3139    | <i>gsp</i> bifunctional glutathionylspermidine amidase/glutathionylspermidine synthetase |
| 3306122 | G | G | G | G | A | G | G | STM3142    | - putative periplasmic ferrichrome-binding protein                                       |
| 3308232 | T | T | G | T | T | T | T | STM3145    | <i>hybE</i> hydrogenase 2-specific chaperone                                             |
| 3312458 | A | A | A | A | A | A | A | STM3149    | <i>hybA</i> hydrogenase 2 protein HybA                                                   |
| 3318138 | A | A | G | G | G | G | G | STM3156    | - putative cytoplasmic protein                                                           |
| 3322921 | G | G | G | G | G | G | A | STM3162    | <i>yghB</i> hypothetical protein                                                         |
| 3323324 | G | G | G | G | G | A | G | STM3163    | <i>yqhC</i> putative transcriptional regulator                                           |
| 3325007 | G | G | G | G | A | G | G | STM3164    | <i>yqhD</i> putative alcohol dehydrogenase                                               |
| 3327035 | A | A | A | A | A | A | G | STM3166.S  | - putative cation transporter                                                            |
| 3327172 | G | G | G | G | G | C | G | STM3166.S  | - putative cation transporter                                                            |
| 3327910 | G | G | G | G | G | A | G |            |                                                                                          |
| 3331488 | A | A | A | A | A | A | G |            |                                                                                          |
| 3332793 | T | T | T | C | C | C | C | STM3170    | - putative inner membrane protein                                                        |
| 3333171 | A | A | G | G | G | G | G | STM3171    | <i>ygiK</i> putative transporter                                                         |
| 3333205 | G | G | G | G | T | G | G | STM3171    | <i>ygiK</i> putative transporter                                                         |
| 3334784 | C | C | T | C | C | C | C | STM3172    | <i>sufI</i> repressor protein for FtsI                                                   |

|         |   |   |   |   |   |   |   |           |             |                                                            |
|---------|---|---|---|---|---|---|---|-----------|-------------|------------------------------------------------------------|
| 3338968 | T | G | T | T | T | T | T | STM3174   | <i>parC</i> | DNA topoisomerase IV subunit A                             |
| 3340037 | G | G | G | G | G | G | A | STM3175   | -           | putative regulatory protein                                |
| 3342548 | T | T | T | T | T | C | T | STM3178   | <i>ygiY</i> | sensor protein QseC                                        |
| 3343870 | G | G | A | G | G | G | G |           |             |                                                            |
| 3344609 | G | A | G | G | G | G | G | STM3181   | <i>parE</i> | DNA topoisomerase IV subunit B                             |
| 3346013 | A | A | C | C | C | C | C | STM3182   | <i>yqiA</i> | esterase YqiA                                              |
| 3348801 | C | C | A | C | C | C | C | STM3186   | <i>tolC</i> | outer membrane channel protein                             |
| 3350888 | A | A | G | A | A | A | A | STM3187   | <i>ygiB</i> | hypothetical protein                                       |
| 3352258 | G | G | G | G | C | G | G | STM3189   | <i>ygiD</i> | hypothetical protein                                       |
| 3352680 | G | G | T | G | G | G | G | STM3189   | <i>ygiD</i> | hypothetical protein                                       |
| 3353879 | G | G | G | G | G | T | G |           |             |                                                            |
| 3367568 | G | G | G | A | A | G | G | STM3202   | <i>ygiF</i> | putative cytoplasmic protein                               |
| 3367727 | C | C | C | C | C | T | C | STM3202   | <i>ygiF</i> | putative cytoplasmic protein                               |
| 3381955 | C | C | C | C | C | A | C | STM3216   | -           | putative methyl-accepting chemotaxis protein               |
| 3385038 | G | G | G | G | G | A | G | STM3218   | <i>oat</i>  | putrescine--2-oxoglutarate aminotransferase                |
| 3388419 | C | C | C | C | C | C | T | STM3220   | <i>ygiO</i> | putative methyltransferase                                 |
| 3391158 | G | G | G | A | A | A | A | STM3223   | <i>ygiR</i> | putative dehydrogenase                                     |
| 3397114 | C | C | C | G | C | C | C | STM3230   | <i>yqiE</i> | putative inner membrane protein                            |
| 3397974 | G | G | A | G | G | G | G | STM3232   | <i>yqiF</i> | hypothetical protein                                       |
| 3397976 | C | C | C | A | C | C | C | STM3232   | <i>yqiF</i> | hypothetical protein                                       |
| 3400747 | G | G | G | G | G | G | T | STM3235   | <i>yhaJ</i> | putative transcriptional regulator                         |
| 3400867 | C | C | C | C | C | C | A | STM3235   | <i>yhaJ</i> | putative transcriptional regulator                         |
| 3402615 | G | G | G | G | G | A | G | STM3238   | <i>yhaN</i> | putative inner membrane protein                            |
| 3404997 | T | T | C | C | C | C | C |           |             |                                                            |
| 3405055 | G | A | G | G | G | G | G | STM3240   | <i>tdcG</i> | L-serine deaminase                                         |
| 3405571 | A | A | A | C | A | A | A | STM3240   | <i>tdcG</i> | L-serine deaminase                                         |
| 3405877 | G | G | G | A | G | G | G | STM3240   | <i>tdcG</i> | L-serine deaminase                                         |
| 3406291 | A | A | A | A | A | A | A | STM3240   | <i>tdcG</i> | L-serine deaminase                                         |
| 3408946 | A | A | A | A | G | A | A | STM3242   | <i>tdcD</i> | propionate/acetate kinase                                  |
| 3409912 | G | C | G | G | G | G | G | STM3242   | <i>tdcD</i> | propionate/acetate kinase                                  |
| 3413523 | T | T | T | T | T | T | C |           |             |                                                            |
| 3418690 | C | C | T | C | C | C | C | STM3250   | <i>garD</i> | galactarate dehydrogenase                                  |
| 3421919 | A | A | A | A | G | A | A | STM3252   | <i>agaR</i> | AGA operon transcriptional repressor                       |
| 3430154 | C | C | C | A | C | C | C | STM3260   | -           | PTS family galactitol-specific enzyme IIC                  |
| 3434415 | C | C | C | C | C | T | C | STM3264   | <i>yraM</i> | putative transglycosylase                                  |
| 3438052 | T | T | T | T | T | T | G | STM3269   | <i>yhbO</i> | putative intracellular proteinase                          |
| 3442687 | T | T | C | C | C | C | C | STM3276   | <i>yhbW</i> | hypothetical protein                                       |
| 3443998 | G | G | G | G | G | G | A | STM3277   | -           | putative inner membrane protein                            |
| 3445144 | A | A | G | A | A | A | A | STM3279   | <i>mtr</i>  | tryptophan permease                                        |
| 3446095 | A | A | A | A | A | A | A |           |             |                                                            |
| 3447713 | G | G | G | G | G | A | G | STM3280.S | <i>deaD</i> | ATP-dependent RNA helicase DeaD                            |
| 3450874 | A | A | A | A | A | A | A | STM3282   | <i>pnp</i>  | polynucleotide phosphorylase/polyadenylase                 |
| 3452119 | T | T | T | T | T | C | T | STM3284   | <i>truB</i> | tRNA pseudouridine synthase B                              |
| 3456658 | G | G | G | G | G | A | G | STM3287   | <i>nusA</i> | transcription elongation factor NusA                       |
| 3456822 | G | G | G | A | A | A | A | STM3287   | <i>nusA</i> | transcription elongation factor NusA                       |
| 3457042 | C | C | C | C | C | C | T | STM3287   | <i>nusA</i> | transcription elongation factor NusA                       |
| 3460273 | G | G | G | G | G | A | G |           |             |                                                            |
| 3462272 | G | G | G | G | G | G | A |           |             |                                                            |
| 3464151 | G | G | G | G | G | A | G | STM3295   | <i>folP</i> | dihydropteroate synthase                                   |
| 3467076 | C | C | T | C | C | C | C | STM3297   | <i>rrmJ</i> | 23S rRNA methyltransferase J                               |
| 3469318 | T | T | T | T | T | C | T | STM3300   | <i>dacB</i> | D-alanyl-D-alanine carboxypeptidase/endopeptidase          |
| 3469459 | C | C | C | C | G | C | C | STM3300   | <i>dacB</i> | D-alanyl-D-alanine carboxypeptidase/endopeptidase          |
| 3474609 | A | A | A | A | A | G | A | STM3306   | <i>nlp</i>  | DNA-binding transcriptional regulator Nlp                  |
| 3481318 | T | T | A | T | T | T | T | STM3315   | <i>yrbH</i> | D-arabinose 5-phosphate isomerase                          |
| 3481993 | G | G | G | G | G | C | G | STM3316   | <i>yrbI</i> | 3-deoxy-D-manno-octulosonate 8-phosphate phosphatase       |
| 3487935 | T | T | T | C | C | C | C |           |             |                                                            |
| 3488112 | C | C | C | C | C | A | C |           |             |                                                            |
| 3489454 | G | G | G | A | G | G | G | STM3326   | <i>mtgA</i> | monofunctional biosynthetic peptidoglycan transglycosylase |
| 3490577 | A | A | G | G | G | G | G | STM3328   | <i>arcB</i> | aerobic respiration control sensor protein ArcB            |
| 3501032 | G | G | G | G | G | G | T | STM3332   | <i>yhcG</i> | putative cytoplasmic protein                               |
| 3508984 | G | G | G | G | G | A | G | STM3339   | <i>nanA</i> | N-acetylneuraminatase lyase                                |
| 3510309 | G | G | G | G | G | G | A | STM3341   | <i>sspB</i> | ClpXP protease specificity-enhancing factor                |
| 3512047 | G | G | G | G | G | G | C | STM3343   | -           | putative cytoplasmic protein                               |
| 3515572 | T | T | G | T | T | T | T | STM3348   | <i>degQ</i> | serine endoprotease                                        |
| 3523562 | G | G | G | G | G | G | A | STM3355   | -           | tartrate dehydratase subunit alpha                         |
| 3525112 | G | G | A | A | A | A | A |           |             |                                                            |
| 3528669 | A | A | A | A | A | A | A |           |             |                                                            |
| 3528768 | G | G | G | A | G | G | G |           |             |                                                            |
| 3534782 | A | A | G | G | G | G | G | STM3368   | <i>tldD</i> | protease TldD                                              |
| 3535393 | G | G | G | G | C | G | G | STM3368   | <i>tldD</i> | protease TldD                                              |
| 3536641 | A | A | A | G | G | A | A | STM3369   | <i>yhdP</i> | hypothetical protein                                       |
| 3540267 | G | G | G | A | A | A | A | STM3370   | <i>cafA</i> | ribonuclease G                                             |
| 3542848 | C | C | C | C | C | T | C | STM3373   | <i>mreC</i> | rod shape-determining protein MreC                         |
| 3545552 | G | G | G | G | T | G | G | STM3375   | <i>yhdA</i> | regulatory protein CsrD                                    |
| 3547736 | G | G | G | A | G | G | G | STM3376   | <i>yhdH</i> | putative oxidoreductase                                    |
| 3549630 | G | G | G | G | G | G | A | STM3378   | -           | putative sulfite oxidase subunit YedZ                      |
| 3551483 | T | T | T | T | C | T | T | STM3380   | <i>accC</i> | acetyl-CoA carboxylase biotin carboxylase subunit          |
| 3552732 | T | T | C | T | T | T | T | STM3382   | <i>panF</i> | sodium/panthothenate symporter                             |
| 3555368 | G | G | A | G | G | G | G | STM3384   | <i>yhdG</i> | tRNA-dihydrouridine synthase B                             |
| 3560053 | T | T | T | T | T | T | C | STM3389   | <i>envR</i> | DNA-binding transcriptional regulator EnvR                 |
| 3560217 | A | A | A | A | A | A | T | STM3389   | <i>envR</i> | DNA-binding transcriptional regulator EnvR                 |

|         |   |   |   |   |   |   |   |            |             |                                                               |
|---------|---|---|---|---|---|---|---|------------|-------------|---------------------------------------------------------------|
| 3562519 | G | G | G | A | G | G | G | STM3391    | <i>acrF</i> | multidrug transport protein                                   |
| 3562532 | G | G | G | G | G | G | A | STM3391    | <i>acrF</i> | multidrug transport protein                                   |
| 3578972 | T | T | T | T | T | T | C | STM3408    | <i>sun</i>  | 16S rRNA methyltransferase B                                  |
| 3581969 | C | C | C | C | C | T | C | STM3412    | <i>zntR</i> | zinc-responsive transcriptional regulator                     |
| 3583787 | G | G | G | G | G | G | A | STM3415    | <i>rpoA</i> | DNA-directed RNA polymerase subunit alpha                     |
| 3587589 | G | A | G | G | G | G | G | STM3421    | <i>rplO</i> | 50S ribosomal protein L15                                     |
| 3588212 | A | A | A | G | A | A | A | STM3423    | <i>rpsE</i> | 30S ribosomal protein S5                                      |
| 3595755 | C | C | A | A | A | A | A | STM3440    | <i>rplC</i> | 50S ribosomal protein L3                                      |
| 3596704 | C | C | C | C | C | T | C |            |             |                                                               |
| 3599978 | C | C | C | C | T | C | C | STM3446    | <i>fusA</i> | elongation factor G                                           |
| 3602425 | G | G | G | G | G | G | A | STM3448    | <i>rpsL</i> | 30S ribosomal protein S12                                     |
| 3602827 | T | T | T | T | T | T | G |            |             |                                                               |
| 3603833 | T | T | T | T | C | T | T | STM3451    | <i>yheN</i> | sulfur transfer complex subunit TusD                          |
| 3606259 | G | G | G | A | G | G | G |            |             |                                                               |
| 3607523 | C | C | C | C | C | C | A | STM3457    | <i>kefB</i> | glutathione-regulated potassium-efflux system protein KefB    |
| 3607712 | G | G | A | G | G | G | G | STM3457    | <i>kefB</i> | glutathione-regulated potassium-efflux system protein KefB    |
| 3609825 | G | G | G | T | T | T | T |            |             |                                                               |
| 3612722 | G | G | G | A | A | A | A | STM3462    | <i>yheT</i> | putative hydrolase                                            |
| 3617896 | C | C | A | A | A | A | A | STM3467    | <i>yhfK</i> | putative inner membrane protein                               |
| 3618179 | G | C | G | T | G | G | G | STM3467    | <i>yhfK</i> | putative inner membrane protein                               |
| 3618254 | G | G | G | G | G | G | A | STM3467    | <i>yhfK</i> | putative inner membrane protein                               |
| 3619157 | A | A | A | G | A | A | A | STM3468    | <i>argD</i> | aminotransferase/acetylornithine transaminase protein         |
| 3619299 | C | C | T | C | C | C | C | STM3468    | <i>argD</i> | aminotransferase/acetylornithine transaminase protein         |
| 3619657 | G | G | G | G | G | A | G | STM3468    | <i>argD</i> | aminotransferase/acetylornithine transaminase protein         |
| 3622576 | T | T | T | T | G | T | T | STM3473    | <i>yhfC</i> | hypothetical protein                                          |
| 3623270 | C | C | C | A | A | A | A |            |             |                                                               |
| 3626874 | T | T | T | T | T | T | T | STM3476    | <i>nirC</i> | nitrite transporter NirC                                      |
| 3628928 | T | T | T | T | T | C | T |            |             |                                                               |
| 3629354 | A | A | A | A | A | A | G | STM3478    | <i>bigA</i> | putative surface-exposed virulence protein                    |
| 3630285 | T | T | T | T | T | T | A | STM3478    | <i>bigA</i> | putative surface-exposed virulence protein                    |
| 3630588 | C | C | C | C | C | C | G | STM3478    | <i>bigA</i> | putative surface-exposed virulence protein                    |
| 3631668 | C | C | T | C | C | C | C | STM3478    | <i>bigA</i> | putative surface-exposed virulence protein                    |
| 3632631 | C | C | C | C | C | A | C | STM3478    | <i>bigA</i> | putative surface-exposed virulence protein                    |
| 3633454 | A | A | A | A | A | C | A | STM3478    | <i>bigA</i> | putative surface-exposed virulence protein                    |
| 3634258 | G | G | G | A | A | A | A | STM3478    | <i>bigA</i> | putative surface-exposed virulence protein                    |
| 3634394 | G | G | G | A | G | G | G | STM3478    | <i>bigA</i> | putative surface-exposed virulence protein                    |
| 3635961 | G | G | G | G | G | A | G | STM3480    | <i>yhfL</i> | putative outer membrane lipoprotein                           |
| 3636277 | G | A | A | G | G | G | G | STM3481    | <i>trpS</i> | tryptophanyl-tRNA synthetase                                  |
| 3639470 | A | A | A | A | A | G | A | STM3484    | <i>dam</i>  | DNA adenine methylase                                         |
| 3646646 | A | A | A | A | A | G | A | STM3493    | <i>mrcA</i> | peptidoglycan synthetase                                      |
| 3653837 | A | A | G | A | A | A | A | STM3498    | <i>hslO</i> | Hsp33-like chaperonin                                         |
| 3654053 | G | G | G | G | G | A | G | STM3498    | <i>hslO</i> | Hsp33-like chaperonin                                         |
| 3665587 | G | G | A | G | G | G | G | STM3506    | <i>feoB</i> | ferrous iron transport protein B                              |
| 3666566 | G | G | T | G | G | G | G | STM3507    | <i>yhgG</i> | putative cytoplasmic protein                                  |
| 3670795 | C | C | T | T | T | T | T | STM3512    | <i>gntT</i> | high-affinity gluconate permease                              |
| 3674777 | C | C | C | C | C | C | T | STM3514    | <i>malP</i> | maltodextrin phosphorylase                                    |
| 3676592 | A | A | G | G | G | G | G |            |             |                                                               |
| 3681781 | C | C | A | A | A | A | A | STM3519    | <i>rtcB</i> | putative cytoplasmic protein                                  |
| 3682652 | C | C | A | A | A | A | A |            |             |                                                               |
| 3686777 | G | G | G | G | A | G | G | STM3523    | <i>glpR</i> | DNA-binding transcriptional repressor GlpR                    |
| 3692182 | C | C | A | C | C | C | C | STM3528    | -           | putative periplasmic phosphate-binding protein                |
| 3693898 | A | A | C | C | C | C | C |            |             |                                                               |
| 3695761 | G | G | A | A | A | A | A | STM3531    | -           | putative dihydroxyacid dehydratase                            |
| 3695893 | C | T | C | C | C | C | C | STM3531    | -           | putative dihydroxyacid dehydratase                            |
| 3705667 | C | C | C | C | C | C | A | STM3537    | <i>glgX</i> | glycogen debranching enzyme                                   |
| 3710649 | G | G | G | G | G | A | G | STM3541    | <i>gntU</i> | low affinity gluconate transporter                            |
| 3710782 | C | C | C | C | C | C | T | STM3541    | <i>gntU</i> | low affinity gluconate transporter                            |
| 3715491 | A | A | A | A | A | G | A |            |             |                                                               |
| 3715500 | C | C | C | C | C | A | C |            |             |                                                               |
| 3715662 | G | G | G | G | G | A | G | STM3546    | <i>yhhY</i> | putative acetyltransferase YhhY                               |
| 3717410 | T | C | C | C | C | C | C | STM3547.Sc | -           | putative transcriptional regulator                            |
| 3718976 | G | G | G | A | A | A | A | STM3549    | -           | putative inner membrane protein                               |
| 3718992 | C | C | A | C | C | C | C | STM3549    | -           | putative inner membrane protein                               |
| 3722230 | T | T | T | T | T | T | G |            |             |                                                               |
| 3723167 | T | T | C | C | C | C | C | STM3553    | <i>ugpQ</i> | cytoplasmic glycerophosphodiester phosphodiesterase           |
| 3723279 | T | T | T | T | T | T | A | STM3553    | <i>ugpQ</i> | cytoplasmic glycerophosphodiester phosphodiesterase           |
| 3730150 | T | T | C | T | T | T | T | STM3562    | <i>livM</i> | leucine/isoleucine/valine transporter permease subunit        |
| 3732617 | T | T | T | T | T | C | T | STM3564    | <i>livK</i> | high-affinity branched-chain amino acid transporter           |
| 3732993 | T | T | T | T | C | T | T | STM3564    | <i>livK</i> | high-affinity branched-chain amino acid transporter           |
| 3734482 | G | G | G | G | G | A | G |            |             |                                                               |
| 3742757 | A | A | G | A | A | A | A | STM3576    | <i>zntA</i> | zinc/cadmium/mercury/lead-transporting ATPase                 |
| 3749077 | C | C | T | C | A | C | C | STM3581.S  | <i>yhhS</i> | major facilitator superfamily transporter                     |
| 3755103 | A | A | A | G | A | A | A | STM3586.S  | <i>yhiH</i> | putative ABC-type multidrug transport system ATPase component |
| 3755210 | A | A | G | G | G | G | G | STM3586.S  | <i>yhiH</i> | putative ABC-type multidrug transport system ATPase component |
| 3757093 | C | C | C | C | C | C | T | STM3588    | <i>yhiN</i> | putative periplasmic protein                                  |
| 3762673 | T | T | T | T | T | T | C | STM3592    | <i>yhiP</i> | inner membrane transporter YhiP                               |
| 3765625 | C | C | C | C | C | C | T | STM3594    | <i>prlC</i> | oligopeptidase A                                              |
| 3767032 | G | G | A | G | G | G | G | STM3595    | -           | putative phosphatase                                          |
| 3768626 | G | A | G | G | G | G | G | STM3597    | <i>gor</i>  | glutathione reductase                                         |

|         |   |   |   |   |   |   |   |         |             |                                                                                    |
|---------|---|---|---|---|---|---|---|---------|-------------|------------------------------------------------------------------------------------|
| 3771752 | A | A | A | A | A | A | G | STM3599 | -           | anaerobic C4-dicarboxylate transporter                                             |
| 3774462 | C | C | T | C | C | C | C | STM3603 | <i>treF</i> | trehalase                                                                          |
| 3777169 | C | C | C | T | T | T | T | STM3604 | -           | putative inner membrane protein                                                    |
| 3778750 | C | C | C | C | T | C | C | STM3605 | -           | putative phage endolysin                                                           |
| 3779214 | G | G | A | G | G | G | G | STM3607 | <i>yhjC</i> | putative transcriptional regulator                                                 |
| 3781216 | G | G | G | G | A | G | G | STM3609 | <i>yhjE</i> | putative transport protein                                                         |
| 3783305 | G | G | G | G | A | G | G | STM3613 | <i>yhjJ</i> | putative Zn-dependent peptidase                                                    |
| 3789085 | A | A | A | A | A | A | A | STM3613 | <i>yhjJ</i> | putative Zn-dependent peptidase                                                    |
| 3789768 | C | C | C | C | T | C | C | STM3616 | <i>yhjL</i> | cellulose synthase subunit BcsC                                                    |
| 3795976 | C | C | C | A | C | C | C | STM3616 | <i>yhjL</i> | cellulose synthase subunit BcsC                                                    |
| 3795998 | C | C | C | C | C | A | C | STM3617 | -           | endo-1,4-D-glucanase                                                               |
| 3798330 | C | C | C | C | C | A | C | STM3622 | <i>yhjS</i> | putative cytoplasmic protein                                                       |
| 3804923 | G | G | A | A | A | A | A | STM3624 | <i>yhjU</i> | putative inner membrane protein                                                    |
| 3807159 | G | G | G | G | G | G | A | STM3625 | <i>yhjV</i> | putative transport protein                                                         |
| 3809409 | T | T | T | T | T | T | C | STM3627 | <i>dppD</i> | dipeptide transporter ATP-binding subunit                                          |
| 3811894 | C | C | C | C | G | C | C | STM3638 | <i>lpfC</i> | long polar fimbrial outer membrane usher protein                                   |
| 3826329 | G | G | G | A | A | A | A | STM3644 | <i>bisC</i> | biotin sulfoxide reductase                                                         |
| 3828318 | T | T | C | C | C | C | C | STM3655 | <i>glyS</i> | glycyl-tRNA synthetase subunit beta                                                |
| 3830783 | G | G | T | G | G | G | G | STM3657 | -           | putative outer membrane lipoprotein                                                |
| 3835448 | G | G | G | G | A | A | G | STM3659 | <i>yiaB</i> | putative inner membrane protein                                                    |
| 3841447 | C | C | C | T | T | T | T | STM3660 | <i>xyfB</i> | xylulokinase                                                                       |
| 3842990 | C | C | C | C | C | T | C | STM3662 | <i>xyfR</i> | xylose operon regulatory protein                                                   |
| 3844540 | G | G | G | G | G | G | A | STM3662 | <i>xyfR</i> | xylose operon regulatory protein                                                   |
| 3845185 | C | A | C | C | C | C | C | STM3664 | <i>malS</i> | periplasmic alpha-amylase precursor                                                |
| 3846435 | C | T | C | C | C | C | C | STM3671 | <i>yiaM</i> | 2,3-diketo-L-gulonate TRAP transporter small permease protein                      |
| 3848519 | C | C | C | T | T | T | T | STM3674 | <i>lyxK</i> | L-xylulose kinase                                                                  |
| 3848536 | A | A | G | G | G | G | G | STM3677 | <i>sgbE</i> | L-ribulose-5-phosphate 4-epimerase                                                 |
| 3848774 | C | C | C | C | C | A | C | STM3678 | -           | putative regulatory protein                                                        |
| 3851361 | A | G | G | G | G | G | G | STM3682 | <i>selB</i> | selenocysteinyl-tRNA-specific translation factor                                   |
| 3858615 | G | G | A | G | G | G | G | STM3683 | <i>selA</i> | selenocysteine synthase                                                            |
| 3862449 | A | A | A | A | A | A | A | STM3684 | <i>yibF</i> | putative glutathione S-transferase                                                 |
| 3864221 | G | G | A | G | A | G | G | STM3685 | <i>mtIA</i> | mannitol-specific enzyme IIABC component                                           |
| 3865189 | C | C | C | C | C | C | A | STM3687 | <i>mtIR</i> | mannitol repressor protein                                                         |
| 3872569 | G | G | G | G | G | G | A | STM3690 | -           | putative inner membrane lipoprotein                                                |
| 3873955 | G | G | G | G | G | A | G | STM3691 | -           | putative inner membrane protein                                                    |
| 3874213 | A | A | G | G | G | G | G | STM3692 | <i>lldP</i> | L-lactate permease                                                                 |
| 3874933 | G | G | G | A | G | G | G | STM3692 | <i>lldP</i> | L-lactate permease                                                                 |
| 3875000 | C | C | C | C | A | C | C | STM3694 | <i>lldD</i> | L-lactate dehydrogenase                                                            |
| 3877158 | A | A | G | A | A | A | A | STM3697 | -           | putative mandelate racemase                                                        |
| 3878678 | C | C | C | A | A | A | A | STM3698 | -           | putative permease                                                                  |
| 3879147 | C | C | C | T | C | C | C | STM3699 | <i>cysE</i> | serine acetyltransferase                                                           |
| 3880454 | C | C | C | C | C | C | T | STM3704 | <i>pmgI</i> | phosphoglyceromutase                                                               |
| 3880787 | A | A | C | A | A | A | A | STM3707 | <i>yibD</i> | putative glycosyl transferase                                                      |
| 3885235 | C | T | C | C | C | C | C | STM3707 | <i>yibD</i> | putative glycosyl transferase                                                      |
| 3885946 | G | A | G | G | G | G | G | STM3711 | <i>rfaF</i> | ADP-heptose:LPS heptosyltransferase II                                             |
| 3886469 | G | G | A | G | G | G | G | STM3711 | <i>rfaF</i> | ADP-heptose:LPS heptosyltransferase II                                             |
| 3888646 | A | C | A | A | A | A | A | STM3711 | <i>rfaF</i> | ADP-heptose:LPS heptosyltransferase II                                             |
| 3891759 | G | G | G | G | C | G | G | STM3713 | <i>rfaL</i> | O-antigen ligase                                                                   |
| 3893050 | T | T | T | T | T | T | C | STM3714 | <i>rfaK</i> | putative hexose transferase<br>UDP-D-galactose:(glucosyl)lipopolysaccharide-1,6-D- |
| 3894569 | C | C | C | C | T | C | C | STM3719 | <i>rfaB</i> | galactosyltransferase                                                              |
| 3898235 | G | G | G | G | G | G | A | STM3721 | <i>rfaP</i> | lipopolysaccharide core biosynthetic protein                                       |
| 3901594 | C | C | T | C | C | C | C | STM3729 | <i>radC</i> | DNA repair protein RadC                                                            |
| 3901838 | A | A | A | A | A | A | A | STM3733 | <i>pyrE</i> | orotate phosphoribosyltransferase                                                  |
| 3906689 | G | A | A | A | A | A | A | STM3735 | <i>yicC</i> | hypothetical protein                                                               |
| 3906733 | A | A | A | G | G | G | G | STM3737 | -           | putative Zn-dependent hydrolase                                                    |
| 3907096 | T | T | G | G | G | G | G | STM3739 | <i>ligB</i> | NAD-dependent DNA ligase LigB                                                      |
| 3907114 | C | C | C | C | C | T | C | STM3744 | <i>recG</i> | ATP-dependent DNA helicase RecG                                                    |
| 3909034 | C | C | C | T | C | C | C | STM3745 | -           | putative cytoplasmic protein                                                       |
| 3910608 | T | C | T | T | T | T | T | STM3747 | <i>yicE</i> | putative purine/xanthine transport protein                                         |
| 3915074 | G | G | G | T | T | T | T | STM3748 | <i>yicH</i> | putative inner membrane protein                                                    |
| 3916407 | G | G | G | G | A | G | G | STM3750 | <i>yicJ</i> | putative transporter                                                               |
| 3923165 | C | C | C | C | C | C | A | STM3755 | <i>rhuM</i> | putative cytoplasmic protein                                                       |
| 3926163 | C | C | C | C | C | A | C | STM3757 | <i>misL</i> | putative autotransporter                                                           |
| 3927727 | A | A | A | A | A | A | A | STM3763 | <i>mgtB</i> | Mg2+ transporter                                                                   |
| 3929662 | C | C | G | C | C | C | C | STM3763 | <i>mgtB</i> | Mg2+ transporter                                                                   |
| 3932528 | A | A | G | G | G | G | G | STM3770 | -           | putative phosphotransferase system enzyme IIC                                      |
| 3938950 | T | T | T | T | C | T | T | STM3770 | -           | putative phosphotransferase system enzyme IIC                                      |
| 3939204 | G | G | G | G | G | G | A | STM3771 | -           | putative phosphotransferase system enzyme IIB                                      |
| 3942451 | G | G | G | G | G | G | A |         |             |                                                                                    |
| 3942797 | C | C | C | T | T | C | C |         |             |                                                                                    |
| 3948001 | C | C | C | T | T | T | T |         |             |                                                                                    |
| 3952050 | T | T | T | T | T | C | T |         |             |                                                                                    |
| 3953645 | A | A | A | G | G | A | A |         |             |                                                                                    |
| 3956981 | T | A | A | T | T | T | T |         |             |                                                                                    |
| 3959696 | T | T | T | T | T | T | C |         |             |                                                                                    |
| 3963918 | A | A | G | G | G | G | G |         |             |                                                                                    |
| 3964087 | A | A | A | A | A | A | G |         |             |                                                                                    |
| 3970719 | G | G | G | G | G | G | T |         |             |                                                                                    |
| 3971057 | G | G | A | G | G | G | G |         |             |                                                                                    |
| 3971590 | C | C | C | T | C | C | C |         |             |                                                                                    |

|         |   |   |   |   |   |   |   |   |           |             |                                                                         |
|---------|---|---|---|---|---|---|---|---|-----------|-------------|-------------------------------------------------------------------------|
| 3974491 | C | C | C | T | T | T | T |   | STM3773   | -           | putative transcriptional regulator                                      |
| 3975123 | T | T | T | T | T | T | T | C | STM3773   | -           | putative transcriptional regulator                                      |
| 3981285 | T | T | T | T | C | T | T |   | STM3781   | -           | putative sugar kinase                                                   |
| 3982349 | A | A | A | A | A | A | A | G | STM3782   | -           | putative PTS system galactitol-specific enzyme IIC component            |
| 3982395 | C | C | C | C | C | C | C | A | STM3782   | -           | putative PTS system galactitol-specific enzyme IIC component            |
| 3982602 | G | G | A | G | G | G | G |   | STM3782   | -           | putative PTS system galactitol-specific enzyme IIC component            |
| 3983464 | G | G | G | G | G | G | A |   | STM3782   | -           | putative PTS system galactitol-specific enzyme IIC component            |
| 3984416 | C | T | C | C | C | C | C | C | STM3784   | -           | phosphotransferase system mannitol/fructose-specific IIA                |
| 3987005 | A | A | A | A | A | A | A | G | STM3787   | <i>uhpT</i> | sugar phosphate antiporter                                              |
| 3988307 | C | C | C | C | C | T | C |   | STM3788   | <i>uhpC</i> | regulatory protein UhpC                                                 |
| 3988449 | G | G | G | G | G | G | T |   | STM3788   | <i>uhpC</i> | regulatory protein UhpC                                                 |
| 3994628 | G | G | A | G | G | G | G |   |           |             |                                                                         |
| 3997414 | C | C | C | C | T | C | C |   |           |             |                                                                         |
| 4004538 | G | G | G | G | G | G | A |   | STM3796   | <i>ilvB</i> | acetolactate synthase catalytic subunit                                 |
| 4005232 | G | G | T | G | G | G | G |   | STM3802   | <i>dsdA</i> | D-serine dehydratase                                                    |
| 4006079 | G | G | A | A | A | A | A |   | STM3802   | <i>dsdA</i> | D-serine dehydratase                                                    |
| 4007917 | C | C | C | C | C | A | C |   | STM3803   | <i>yidF</i> | putative cytoplasmic protein                                            |
| 4011434 | T | T | T | T | T | T | C |   | STM3807   | <i>yidE</i> | hypothetical protein                                                    |
| 4012079 | T | T | T | T | T | T | C |   | STM3811   | <i>yidR</i> | putative cytoplasmic protein                                            |
| 4030718 | T | T | A | T | T | T | T |   | STM3811   | <i>yidR</i> | putative cytoplasmic protein                                            |
| 4034116 | G | G | A | G | G | G | G |   | STM3828   | <i>dgoA</i> | galactonate dehydratase                                                 |
| 4039068 | C | C | C | T | C | C | C |   |           |             |                                                                         |
| 4042015 | C | C | G | C | C | C | C |   | STM3835   | <i>gyrB</i> | DNA gyrase subunit B                                                    |
| 4043906 | G | G | G | G | G | G | A |   | STM3836   | <i>recF</i> | recombination protein F                                                 |
| 4044185 | A | A | A | A | A | A | A | G | STM3838   | <i>dnaA</i> | chromosomal replication initiation protein                              |
| 4050025 | C | C | C | A | A | A | A |   | STM3838   | <i>dnaA</i> | chromosomal replication initiation protein                              |
| 4050785 | T | T | T | A | A | A | A |   |           |             |                                                                         |
| 4052471 | T | T | T | T | T | C | T |   | STM3846.s | -           | putative reverse transcriptase                                          |
| 4052651 | C | C | C | C | C | C | T |   | STM3846.s | -           | putative reverse transcriptase                                          |
| 4053588 | C | C | A | C | C | C | C |   |           |             |                                                                         |
| 4054220 | G | G | A | G | G | G | G |   | STM3847   | <i>yidY</i> | multidrug efflux system protein MdtL                                    |
| 4059719 | G | G | G | G | T | G | G |   | STM3852   | <i>yieH</i> | 6-phosphogluconate phosphatase                                          |
| 4062113 | G | G | G | G | G | G | A |   | STM3855   | <i>pstA</i> | phosphate transporter permease subunit PtsA                             |
| 4076962 | G | G | G | G | G | G | A |   | STM3867   | <i>atpA</i> | F0F1 ATP synthase subunit alpha                                         |
| 4078626 | C | C | C | C | C | T | C |   | STM3869   | <i>atpF</i> | F0F1 ATP synthase subunit B                                             |
| 4082772 | G | G | G | G | A | G | G |   | STM3874   | <i>gidA</i> | tRNA uridine 5-carboxymethylaminomethyl modification enzyme             |
| 4084017 | G | G | G | G | T | G | G |   |           |             |                                                                         |
| 4084165 | C | C | C | T | T | T | T |   |           |             |                                                                         |
| 4085256 | G | G | G | G | A | G | G |   |           |             |                                                                         |
| 4089567 | T | T | T | T | T | T | G |   |           |             |                                                                         |
| 4094382 | G | G | A | G | G | G | G |   | STM3883   | <i>rbsC</i> | ribose ABC transporter permease protein                                 |
| 4097899 | G | G | G | G | G | T | G |   | STM3887   | <i>yieO</i> | putative transport protein                                              |
| 4107104 | C | C | C | C | C | T | C |   | STM3899   | <i>yifB</i> | putative ATP-dependent protease                                         |
| 4110058 | G | G | A | G | G | G | G |   | STM3901   | <i>ilvG</i> | acetolactate synthase 2 catalytic subunit                               |
| 4111926 | G | G | A | G | G | G | G |   |           |             |                                                                         |
| 4112694 | T | T | T | T | T | C | T |   | STM3904   | <i>ilvD</i> | dihydroxy-acid dehydratase                                              |
| 4121121 | G | G | G | G | G | G | A |   | STM3912   | <i>rep</i>  | ATP-dependent DNA helicase Rep                                          |
| 4133983 | T | T | T | T | C | T | T |   | STM3925   | <i>wecE</i> | TDP-4-oxo-6-deoxy-D-glucose transaminase                                |
| 4136031 | C | C | C | C | T | C | C |   | STM3926   | <i>wzxE</i> | O-antigen translocase                                                   |
| 4136277 | G | G | G | G | G | G | T |   | STM3927   | -           | 4-alpha-L-fucosyltransferase                                            |
| 4136675 | A | A | A | A | A | A | A |   | STM3927   | -           | 4-alpha-L-fucosyltransferase                                            |
| 4137573 | A | A | A | A | A | A | A |   | STM3928   | <i>wecF</i> | putative common antigen polymerase                                      |
| 4140028 | G | G | G | C | C | C | C |   | STM3930   | <i>yifK</i> | putative transport protein YifK                                         |
| 4150724 | C | C | C | G | C | C | C |   | STM3943   | <i>cyaY</i> | frataxin-like protein                                                   |
| 4153239 | C | C | C | C | C | C | T |   | STM3948   | <i>yigA</i> | hypothetical protein                                                    |
| 4158327 | G | G | G | G | G | A | G |   | STM3952   | <i>corA</i> | magnesium/nickel/cobalt transporter CorA                                |
| 4158778 | C | C | C | C | C | C | T |   | STM3952   | <i>corA</i> | magnesium/nickel/cobalt transporter CorA                                |
| 4159293 | T | T | T | T | T | T | C |   | STM3953   | <i>yigF</i> | putative inner membrane protein                                         |
| 4166265 | C | C | C | C | C | T | C |   | STM3961   | <i>pldB</i> | lysophospholipase L2                                                    |
| 4168743 | G | G | G | T | G | G | G |   | STM3964   | <i>metR</i> | metE/metH regulator                                                     |
| 4169785 | C | C | C | T | T | T | T |   | STM3965   | <i>metE</i> | 5-methyltetrahydropteroyltryglutamate--homocysteine S-methyltransferase |
| 4170512 | C | C | C | T | T | T | T |   | STM3965   | <i>metE</i> | 5-methyltetrahydropteroyltryglutamate--homocysteine S-methyltransferase |
| 4173785 | C | C | A | C | C | C | C |   |           |             |                                                                         |
| 4174788 | A | A | G | A | A | A | A |   | STM3974   | <i>tatB</i> | sec-independent translocase                                             |
| 4181172 | G | G | A | G | G | G | G |   | STM3976.S | <i>yigW</i> | DNase TatD                                                              |
| 4182484 | C | C | C | C | T | C | C |   | STM3978   | <i>yigC</i> | 3-octaprenyl-4-hydroxybenzoate decarboxylase                            |
| 4184690 | C | C | C | C | C | C | T |   | STM3980   | -           | putative outer membrane protein                                         |
| 4186236 | G | T | G | G | G | G | G |   | STM3980   | -           | putative outer membrane protein                                         |
| 4186828 | T | T | C | C | C | C | C |   | STM3983   | <i>fadB</i> | multifunctional fatty acid oxidation complex subunit alpha              |
| 4189514 | C | C | C | C | C | C | T |   | STM3985   | <i>yigZ</i> | hypothetical protein                                                    |
| 4193570 | C | C | C | C | C | C | T |   | STM3986   | <i>trkH</i> | potassium transporter                                                   |
| 4195049 | C | C | T | C | C | C | C |   | STM4005   | <i>glnG</i> | nitrogen regulation protein NR(I)                                       |
| 4212874 | C | C | C | C | C | T | C |   | STM4005   | <i>glnG</i> | nitrogen regulation protein NR(I)                                       |
| 4212998 | A | A | A | A | A | A | G |   | STM4015   | -           | putative cytoplasmic protein                                            |
| 4224046 | A | A | A | A | A | G | A |   | STM4018   | <i>yihP</i> | GPH family transport protein                                            |
| 4228130 | C | C | C | C | C | C | A |   | STM4023   | <i>yihU</i> | putative oxidoreductase                                                 |
| 4234300 | T | T | C | C | C | C | C |   |           |             |                                                                         |
| 4234719 | G | G | G | G | G | G | A |   |           |             |                                                                         |
| 4235079 | C | C | T | C | C | C | C |   | STM4024.S | <i>yihV</i> | putative sugar kinase                                                   |

|           |             |                                                         |   |   |   |   |   |         |             |                                      |
|-----------|-------------|---------------------------------------------------------|---|---|---|---|---|---------|-------------|--------------------------------------|
| 4244367   | C           | C                                                       | T | C | C | C | C | STM4036 | <i>fdoH</i> | formate dehydrogenase-O beta subunit |
| 4246576   | G           | G                                                       | G | G | G | G | A | STM4037 | <i>fdoG</i> | formate dehydrogenase alpha subunit  |
| 4249877   | C           | C                                                       | A | C | C | C | C | STM4039 | -           | putative inner membrane lipoprotein  |
| 4255655   | A           | C                                                       | A | A | A | A | A | STM4045 | <i>rhaD</i> | rhamnulose-1-phosphate aldolase      |
| 4256890   | C           | C                                                       | C | T | T | T | T | STM4046 | <i>rhaA</i> | L-rhamnose isomerase                 |
| 4259767   | A           | A                                                       | T | A | A | A | A | STM4048 | <i>rhaS</i> | transcriptional activator RhaS       |
| 4260000   | G           | G                                                       | A | G | G | G | G |         |             |                                      |
| 4260510   | G           | G                                                       | G | G | G | A | G | STM4049 | <i>rhaR</i> | transcriptional activator RhaR       |
| 4262199   | A           | A                                                       | A | A | A | G | A |         |             |                                      |
| 4262511   | G           | G                                                       | A | G | G | G | G |         |             |                                      |
| 4267942   | G           | G                                                       | A | G | G | G | G |         |             |                                      |
| 4269000   | T           | T                                                       | C | C | C | C | C |         |             |                                      |
| 4271394   | C           | C                                                       | C | T | C | C | C |         |             |                                      |
| 4271667   | C           | C                                                       | C | C | C | C | G |         |             |                                      |
| 4273163   | A           | A                                                       | A | G | A | A | A |         |             |                                      |
| 4274567   | G           | G                                                       | G | G | G | G | A |         |             |                                      |
| 4278245   | G           | G                                                       | G | G | G | G | A |         |             |                                      |
| 4281820   | A           | A                                                       | G | G | G | G | G |         |             |                                      |
| 4282003   | C           | C                                                       | C | C | C | T | C |         |             |                                      |
| 4282691   | C           | C                                                       | C | C | C | C | T |         |             |                                      |
| 4287709   | G           | G                                                       | A | G | G | G | G |         |             |                                      |
| 4292455   | T           | T                                                       | T | T | T | A | T |         |             |                                      |
| 4294969   | G           | G                                                       | A | G | G | G | G |         |             |                                      |
| 4294985   | A           | A                                                       | G | G | G | G | G |         |             |                                      |
| 4295488   | C           | C                                                       | C | C | C | C | T |         |             |                                      |
| 4297171   | C           | C                                                       | C | C | A | C | C |         |             |                                      |
| 4299004   | G           | G                                                       | G | G | T | G | G |         |             |                                      |
| 4299090   | C           | C                                                       | C | C | C | C | T |         |             |                                      |
| 4302716   | A           | A                                                       | A | T | A | A | A |         |             |                                      |
| 4304963   | C           | C                                                       | C | C | C | T | C |         |             |                                      |
| 4307064   | C           | C                                                       | C | C | T | C | C |         |             |                                      |
| 4313563   | C           | C                                                       | C | C | C | G | C |         |             |                                      |
| 4313609   | A           | A                                                       | G | G | G | G | G |         |             |                                      |
| 4317766   | T           | T                                                       | G | G | G | G | G |         |             |                                      |
| 4319888   | C           | C                                                       | T | T | T | T | T |         |             |                                      |
| 4324758   | G           | G                                                       | C | G | G | G | G |         |             |                                      |
| 4329614   | G           | G                                                       | G | G | G | A | G |         |             |                                      |
| 4333591   | A           | A                                                       | A | A | A | G | A |         |             |                                      |
| 4338081   | C           | C                                                       | C | C | T | C | C |         |             |                                      |
| 4364880   | G           | A                                                       | G | G | G | G | G |         |             |                                      |
| 4366519   | A           | A                                                       | G | G | G | G | G |         |             |                                      |
| 4369438   | C           | C                                                       | T | T | T | T | T |         |             |                                      |
| 4369753   | C           | C                                                       | C | C | C | C | T |         |             |                                      |
| 4375214   | T           | T                                                       | T | C | C | C | C |         |             |                                      |
| 4375769   | T           | T                                                       | T | T | T | T | C |         |             |                                      |
| 4376461   | G           | G                                                       | G | A | G | G | G |         |             |                                      |
| 4376730   | C           | C                                                       | T | C | C | C | C |         |             |                                      |
| 4377220   | A           | A                                                       | A | A | A | C | A |         |             |                                      |
| 4381369   | A           | A                                                       | A | T | A | A | A |         |             |                                      |
| 4384227   | G           | A                                                       | A | A | A | A | A |         |             |                                      |
| 4384994   | C           | C                                                       | C | C | C | C | T |         |             |                                      |
| 4386273   | A           | A                                                       | A | A | A | G | A |         |             |                                      |
| 4389262   | C           | C                                                       | C | C | T | C | C |         |             |                                      |
| 4392288   | C           | C                                                       | C | C | C | T | C |         |             |                                      |
| 4399629   | A           | A                                                       | A | A | A | A | G |         |             |                                      |
| 4399635   | A           | A                                                       | C | A | A | A | C |         |             |                                      |
| 4400415   | C           | C                                                       | C | C | A | A | A |         |             |                                      |
| 4408461   | C           | C                                                       | C | C | T | C | C |         |             |                                      |
| 4414011   | C           | C                                                       | C | C | C | A | C |         |             |                                      |
| 4416952   | G           | G                                                       | G | T | G | G | G |         |             |                                      |
| 4419314   | G           | G                                                       | A | A | A | A | A |         |             |                                      |
| 4419826   | G           | G                                                       | G | G | A | G | G |         |             |                                      |
| 4425190   | C           | C                                                       | C | C | C | C | T |         |             |                                      |
| 4431253   | C           | C                                                       | C | T | T | T | T |         |             |                                      |
| 4432145   | C           | C                                                       | C | C | A | C | C |         |             |                                      |
| 4436536   | C           | C                                                       | T | T | T | T | T |         |             |                                      |
| 4436710   | C           | C                                                       | C | T | C | C | C |         |             |                                      |
| 4437535   | C           | C                                                       | C | C | C | C | T |         |             |                                      |
| 4438492   | C           | C                                                       | C | T | C | C | C |         |             |                                      |
| 4439926   | T           | T                                                       | T | T | A | T | T |         |             |                                      |
| 4442750   | G           | G                                                       | G | A | A | A | A |         |             |                                      |
| 4445007   | G           | G                                                       | T | G | G | G | G |         |             |                                      |
| 4450313   | C           | C                                                       | C | C | T | C | C |         |             |                                      |
| 4456522   | G           | G                                                       | G | C | C | C | C |         |             |                                      |
| 4462372   | G           | G                                                       | A | A | A | A | A |         |             |                                      |
| 4462523   | T           | T                                                       | T | C | C | C | C |         |             |                                      |
| 4465206   | G           | G                                                       | G | T | T | T | T |         |             |                                      |
| 4469863   | G           | G                                                       | G | G | G | G | A |         |             |                                      |
| 4472680   | C           | C                                                       | C | C | C | C | G |         |             |                                      |
| 4473459   | G           | G                                                       | A | G | G | G | G |         |             |                                      |
| 4479124   | C           | C                                                       | C | C | C | C | T |         |             |                                      |
| STM4036   | <i>fdoH</i> | formate dehydrogenase-O beta subunit                    |   |   |   |   |   |         |             |                                      |
| STM4037   | <i>fdoG</i> | formate dehydrogenase alpha subunit                     |   |   |   |   |   |         |             |                                      |
| STM4039   | -           | putative inner membrane lipoprotein                     |   |   |   |   |   |         |             |                                      |
| STM4045   | <i>rhaD</i> | rhamnulose-1-phosphate aldolase                         |   |   |   |   |   |         |             |                                      |
| STM4046   | <i>rhaA</i> | L-rhamnose isomerase                                    |   |   |   |   |   |         |             |                                      |
| STM4048   | <i>rhaS</i> | transcriptional activator RhaS                          |   |   |   |   |   |         |             |                                      |
| STM4049   | <i>rhaR</i> | transcriptional activator RhaR                          |   |   |   |   |   |         |             |                                      |
| STM4057   | -           | putative inner membrane protein                         |   |   |   |   |   |         |             |                                      |
| STM4058   | <i>cpxA</i> | two-component sensor protein                            |   |   |   |   |   |         |             |                                      |
| STM4061   | <i>fieF</i> | ferrous iron efflux protein F                           |   |   |   |   |   |         |             |                                      |
| STM4061   | <i>fieF</i> | ferrous iron efflux protein F                           |   |   |   |   |   |         |             |                                      |
| STM4062   | <i>pfkA</i> | 6-phosphofructokinase                                   |   |   |   |   |   |         |             |                                      |
| STM4067   | -           | putative ADP-ribosylglycohydrolase                      |   |   |   |   |   |         |             |                                      |
| STM4072   | <i>ydeV</i> | autoinducer-2 (AI-2) kinase                             |   |   |   |   |   |         |             |                                      |
| STM4072   | <i>ydeV</i> | autoinducer-2 (AI-2) kinase                             |   |   |   |   |   |         |             |                                      |
| STM4073   | <i>ydeW</i> | putative transcriptional repressor                      |   |   |   |   |   |         |             |                                      |
| STM4077   | <i>yneA</i> | putative sugar transport protein                        |   |   |   |   |   |         |             |                                      |
| STM4084   | <i>fpr</i>  | ferredoxin-NADP reductase                               |   |   |   |   |   |         |             |                                      |
| STM4086   | <i>glpK</i> | glycerol kinase                                         |   |   |   |   |   |         |             |                                      |
| STM4086   | <i>glpK</i> | glycerol kinase                                         |   |   |   |   |   |         |             |                                      |
| STM4086   | <i>glpK</i> | glycerol kinase                                         |   |   |   |   |   |         |             |                                      |
| STM4088   | <i>yjiU</i> | putative cytoplasmic protein                            |   |   |   |   |   |         |             |                                      |
| STM4090   | <i>menA</i> | 1,4-dihydroxy-2-naphthoate octaprenyltransferase        |   |   |   |   |   |         |             |                                      |
| STM4094   | <i>cytR</i> | DNA-binding transcriptional regulator CytR              |   |   |   |   |   |         |             |                                      |
| STM4095   | <i>priA</i> | primosome assembly protein PriA                         |   |   |   |   |   |         |             |                                      |
| STM4098   | -           | putative arylsulfate sulfotransferase                   |   |   |   |   |   |         |             |                                      |
| STM4102   | -           | putative inner membrane protein                         |   |   |   |   |   |         |             |                                      |
| STM4102   | -           | putative inner membrane protein                         |   |   |   |   |   |         |             |                                      |
| STM4104   | -           | putative 5'-nucleotidase/2',3'-cyclic phosphodiesterase |   |   |   |   |   |         |             |                                      |
| STM4106   | <i>katG</i> | hydroperoxidase                                         |   |   |   |   |   |         |             |                                      |
| STM4110   | <i>ptsA</i> | PEP-protein phosphotransferase                          |   |   |   |   |   |         |             |                                      |
| STM4114   | <i>pfID</i> | putative formate acetyltransferase 2                    |   |   |   |   |   |         |             |                                      |
| STM4118   | <i>yjiP</i> | hypothetical protein                                    |   |   |   |   |   |         |             |                                      |
| STM4151   | <i>rpLJ</i> | 50S ribosomal protein L10                               |   |   |   |   |   |         |             |                                      |
| STM4153   | <i>rpoB</i> | DNA-directed RNA polymerase subunit beta                |   |   |   |   |   |         |             |                                      |
| STM4153   | <i>rpoB</i> | DNA-directed RNA polymerase subunit beta                |   |   |   |   |   |         |             |                                      |
| STM4153   | <i>rpoB</i> | DNA-directed RNA polymerase subunit beta                |   |   |   |   |   |         |             |                                      |
| STM4157   | -           | putative cytoplasmic protein                            |   |   |   |   |   |         |             |                                      |
| STM4158   | -           | putative cytoplasmic protein                            |   |   |   |   |   |         |             |                                      |
| STM4159   | <i>thiH</i> | thiamine biosynthesis protein ThiH                      |   |   |   |   |   |         |             |                                      |
| STM4164   | <i>thiC</i> | thiamine biosynthesis protein ThiC                      |   |   |   |   |   |         |             |                                      |
| STM4167   | <i>hemE</i> | uroporphyrinogen decarboxylase                          |   |   |   |   |   |         |             |                                      |
| STM4167   | <i>hemE</i> | uroporphyrinogen decarboxylase                          |   |   |   |   |   |         |             |                                      |
| STM4169   | <i>yjaG</i> | putative cytoplasmic protein                            |   |   |   |   |   |         |             |                                      |
| STM4173   | <i>hydH</i> | sensor protein ZraS                                     |   |   |   |   |   |         |             |                                      |
| STM4175   | <i>purD</i> | phosphoribosylamine--glycine ligase                     |   |   |   |   |   |         |             |                                      |
| STM4181   | <i>yjaB</i> | hypothetical protein                                    |   |   |   |   |   |         |             |                                      |
| STM4188.S | <i>metH</i> | B12-dependent methionine synthase                       |   |   |   |   |   |         |             |                                      |
| STM4190   | <i>pepE</i> | peptidase E                                             |   |   |   |   |   |         |             |                                      |
| STM4195   | -           | putative Na+-dependent transporter                      |   |   |   |   |   |         |             |                                      |
| STM4198   | -           | putative cytoplasmic protein                            |   |   |   |   |   |         |             |                                      |
| STM4204   | -           | putative inner membrane protein                         |   |   |   |   |   |         |             |                                      |
| STM4211   | -           | putative phage tail protein                             |   |   |   |   |   |         |             |                                      |
| STM4211   | -           | putative phage tail protein                             |   |   |   |   |   |         |             |                                      |
| STM4217   | -           | putative soluble lytic murein transglycosylase          |   |   |   |   |   |         |             |                                      |
| STM4217   | -           | putative soluble lytic murein transglycosylase          |   |   |   |   |   |         |             |                                      |
| STM4220   | <i>lysC</i> | aspartate kinase III                                    |   |   |   |   |   |         |             |                                      |
| STM4223   | <i>yjbF</i> | putative outer membrane lipoprotein                     |   |   |   |   |   |         |             |                                      |
| STM4225   | <i>yjbH</i> | putative outer membrane lipoprotein                     |   |   |   |   |   |         |             |                                      |
| STM4229   | <i>malE</i> | maltose ABC transporter periplasmic protein             |   |   |   |   |   |         |             |                                      |
| STM4235   | <i>plsB</i> | glycerol-3-phosphate acyltransferase                    |   |   |   |   |   |         |             |                                      |
| STM4244   | <i>pspG</i> | phage shock protein G                                   |   |   |   |   |   |         |             |                                      |
| STM4248   | <i>tyrB</i> | aromatic amino acid aminotransferase                    |   |   |   |   |   |         |             |                                      |
| STM4253   | -           | putative outer membrane lipoprotein                     |   |   |   |   |   |         |             |                                      |
| STM4254   | <i>uvrA</i> | excinuclease ABC subunit A                              |   |   |   |   |   |         |             |                                      |
| STM4258   | -           | putative methyl-accepting chemotaxis protein            |   |   |   |   |   |         |             |                                      |

|         |               |           |             |                                                                                                                                                    |
|---------|---------------|-----------|-------------|----------------------------------------------------------------------------------------------------------------------------------------------------|
| 4482340 | C C C C T C C | STM4260   | -           | cation efflux pump                                                                                                                                 |
| 4485170 | A A G A A A A | STM4261   | -           | putative inner membrane protein                                                                                                                    |
| 4485899 | C A C C C C C | STM4261   | -           | putative inner membrane protein                                                                                                                    |
| 4486898 | C C C C T C C | STM4261   | -           | putative inner membrane protein                                                                                                                    |
| 4492562 | T T C C C C C | STM4261   | -           | putative inner membrane protein                                                                                                                    |
| 4493493 | A A A T A A A | STM4261   | -           | putative inner membrane protein                                                                                                                    |
| 4494357 | C C C C C C T | STM4261   | -           | putative inner membrane protein                                                                                                                    |
| 4494860 | A A A A A A G | STM4261   | -           | putative inner membrane protein                                                                                                                    |
| 4500085 | T T T T C T T | STM4262   | -           | putative ABC-type bacteriocin/lantibiotic exporter                                                                                                 |
| 4514655 | C C C C T C C | STM4275   | <i>acs</i>  | acetyl-CoA synthetase                                                                                                                              |
| 4515571 | G G G G G A G | STM4275   | <i>acs</i>  | acetyl-CoA synthetase                                                                                                                              |
| 4516874 | C C C C C C A | STM4277   | <i>nrfA</i> | cytochrome c552                                                                                                                                    |
| 4521798 | A A T A A A A | STM4281   | <i>nrfE</i> | formate-dependent nitrite reductase                                                                                                                |
| 4526698 | A A A G A A A | STM4285   | <i>fdhF</i> | formate dehydrogenase                                                                                                                              |
| 4526717 | T T C C C C C | STM4285   | <i>fdhF</i> | formate dehydrogenase                                                                                                                              |
| 4528169 | C C C C C C A | STM4286   | <i>lpxO</i> | putative dioxygenase                                                                                                                               |
| 4528350 | A A C A A A A | STM4286   | <i>lpxO</i> | putative dioxygenase                                                                                                                               |
| 4535276 | A G A A A A A | STM4293   | <i>yjdB</i> | putative cell division protein                                                                                                                     |
| 4535645 | A A A A A A G | STM4293   | <i>yjdB</i> | putative cell division protein                                                                                                                     |
| 4536161 | T T C T T T T | STM4294   | <i>yjdB</i> | putative cell division protein                                                                                                                     |
| 4537685 | T T T T G T T | STM4294   | <i>yjdB</i> | putative cell division protein                                                                                                                     |
| 4537713 | A G A A A A A | STM4295   | <i>adiY</i> | transcriptional activator                                                                                                                          |
| 4548480 | T T T T T T C | STM4295   | <i>adiY</i> | transcriptional activator                                                                                                                          |
| 4551274 | G G G G A G G | STM4304   | <i>dcuS</i> | sensory histidine kinase DcuS                                                                                                                      |
| 4551677 | G G A G G G G |           |             |                                                                                                                                                    |
| 4555195 | C C C C C C T | STM4307   | -           | putative anaerobic dimethylsulfoxide reductase subunit C                                                                                           |
| 4559142 | C C T T T T T |           |             |                                                                                                                                                    |
| 4561036 | G A A A A A A | STM4315   | -           | putative DNA-binding protein                                                                                                                       |
| 4561212 | T T T C T T T | STM4315   | -           | putative DNA-binding protein                                                                                                                       |
| 4561979 | A A A G A A A |           |             |                                                                                                                                                    |
| 4564666 | G G G G G G A |           |             |                                                                                                                                                    |
| 4568781 | A A G A A A A | STM4323   | <i>dipZ</i> | thiol:disulfide interchange protein precursor                                                                                                      |
| 4574373 | A A A A A A C | STM4328   | <i>yjEH</i> | inner membrane protein YjEH                                                                                                                        |
| 4578525 | G A T G G G G |           |             |                                                                                                                                                    |
| 4582025 | C C C T T T T | STM4339   | <i>blc</i>  | outer membrane lipoprotein Blc                                                                                                                     |
| 4582487 | T T T A A A A | STM4340   | <i>frdD</i> | fumarate reductase subunit D                                                                                                                       |
| 4587142 | T T C A T T T |           |             |                                                                                                                                                    |
| 4587173 | A A A A A G A |           |             |                                                                                                                                                    |
| 4590084 | G G G A A A A | STM4347   | <i>yjEP</i> | hypothetical protein                                                                                                                               |
| 4591806 | C C C C C C T | STM4347   | <i>yjEP</i> | hypothetical protein                                                                                                                               |
| 4594426 | C C C C C T C | STM4349   | <i>yjEQ</i> | ribosome-associated GTPase                                                                                                                         |
| 4595988 | C C A C C C C | STM4351   | -           | putative arginine-binding periplasmic protein                                                                                                      |
| 4597156 | C C C T T T T |           |             |                                                                                                                                                    |
| 4599152 | T T C C C C C | STM4356   | <i>yjEF</i> | hypothetical protein                                                                                                                               |
| 4599227 | A A A T A A A | STM4356   | <i>yjEF</i> | hypothetical protein                                                                                                                               |
| 4602744 | A C C C C C C | STM4359   | <i>mutL</i> | DNA mismatch repair protein                                                                                                                        |
| 4603961 | T T T A A A A | STM4360   | <i>miaA</i> | tRNA delta(2)-isopentenylpyrophosphate transferase                                                                                                 |
| 4605299 | T T G G G G G | STM4362   | <i>hflX</i> | putative GTPase HflX                                                                                                                               |
| 4607491 | C C C C C C T | STM4363   | <i>hflK</i> | FtsH protease regulator HflK                                                                                                                       |
| 4609669 | A A A A A A T | STM4366   | <i>purA</i> | adenylosuccinate synthetase                                                                                                                        |
| 4611636 | G G A G G G G | STM4368   | <i>vacB</i> | exoribonuclease R                                                                                                                                  |
| 4615412 | C C C C C T C | STM4371   | <i>yjJF</i> | putative phage shock protein A                                                                                                                     |
| 4615424 | C C C C C T C | STM4371   | <i>yjJF</i> | putative phage shock protein A                                                                                                                     |
| 4615757 | C C T C C C C | STM4372   | -           | putative potassium channels                                                                                                                        |
| 4622084 | C C A C C C C |           |             |                                                                                                                                                    |
| 4622105 | T T C C C C C |           |             |                                                                                                                                                    |
| 4625349 | C C C C C T C | STM4383.S | <i>ulaA</i> | ascorbate-specific PTS system enzyme IIC                                                                                                           |
| 4625967 | T T T T T T C | STM4383.S | <i>ulaA</i> | ascorbate-specific PTS system enzyme IIC                                                                                                           |
| 4628048 | G G G A A G G | STM4386   | <i>ulaD</i> | 3-keto-L-gulonate-6-phosphate decarboxylase                                                                                                        |
| 4631400 | C C G G G G G | STM4393   | <i>rpsR</i> | 30S ribosomal protein S18                                                                                                                          |
| 4631401 | G C C C C C C | STM4393   | <i>rpsR</i> | 30S ribosomal protein S18                                                                                                                          |
| 4632428 | A A A A A A C | STM4395   | <i>yjJZ</i> | putative permease                                                                                                                                  |
| 4633564 | G G G G A G G | STM4396   | <i>yjFB</i> | putative cell envelope opacity-associated protein A                                                                                                |
| 4634616 | G G A G G G G |           |             |                                                                                                                                                    |
| 4634965 | G G C G G G G | STM4398   | <i>cycA</i> | D-alanine/D-serine/glycine permease                                                                                                                |
| 4636893 | C C T C C C C | STM4399   | <i>yjFE</i> | iron-sulfur cluster repair di-iron protein bifunctional 2',3'-cyclic nucleotide 2'-phosphodiesterase/3'-nucleotidase periplasmic precursor protein |
| 4639675 | G G G G G G C | STM4403   | <i>cpdB</i> | nucleotidase periplasmic precursor protein                                                                                                         |
| 4641522 | A A A G A A A |           |             |                                                                                                                                                    |
| 4648481 | G G G G A G G | STM4410   | <i>yjFN</i> | putative periplasmic protein                                                                                                                       |
| 4651658 | A A A G A A A | STM4411   | <i>yjFP</i> | putative cytoplasmic protein                                                                                                                       |
| 4653583 | C C C T T T T | STM4413   | -           | putative metallo-dependent hydrolase UDP-N-acetylmuramate/L-alanyl-gamma-D-glutamyl-meso-diaminopimelate ligase                                    |
| 4657427 | A A A A G A A | STM4416   | <i>mpl</i>  | diaminopimelate ligase                                                                                                                             |
| 4658213 | T T T T C T T |           |             |                                                                                                                                                    |
| 4659182 | A A A A A A G | STM4417   | -           | putative transcriptional regulator                                                                                                                 |
| 4659705 | C C C C C C T | STM4418   | -           | sugar transporter                                                                                                                                  |
| 4660101 | C C T C C C C | STM4418   | -           | sugar transporter                                                                                                                                  |
| 4660685 | G G G G G G A | STM4418   | -           | sugar transporter                                                                                                                                  |
| 4661013 | C C C C T C C |           |             |                                                                                                                                                    |
| 4661027 | A A A A A A G |           |             |                                                                                                                                                    |

|         |                 |            |                                                                                                  |
|---------|-----------------|------------|--------------------------------------------------------------------------------------------------|
| 4661047 | A A A A A A T   |            |                                                                                                  |
| 4661135 | C C C C A C C   |            |                                                                                                  |
| 4661252 | G G A G G G G   |            |                                                                                                  |
| 4663927 | T T T C C C C   |            |                                                                                                  |
| 4664869 | T T C C C C C   | STM4421    | - putative NAD-dependent aldehyde dehydrogenase                                                  |
| 4665624 | G G G T G G G   |            |                                                                                                  |
| 4668287 | C T C C C C C   | STM4425    | - putative dehydrogenase                                                                         |
| 4669309 | C C C C C C C A | STM4426    | <i>srfl</i> lysosomal glucosyl ceramidase-like protein                                           |
| 4672081 | C T C C C C C   | STM4428    | - major facilitator superfamily transporter                                                      |
| 4672647 | C C C C C T C   |            |                                                                                                  |
| 4674037 | C C C C C A C   |            |                                                                                                  |
| 4674537 | G G G G A G G   |            |                                                                                                  |
| 4674556 | C C C C C T C   |            |                                                                                                  |
| 4674563 | G G G G G G T   |            |                                                                                                  |
| 4674658 | A A A G G G G   |            |                                                                                                  |
| 4676929 | G G A G G G G   | STM4433    | - myo-inositol 2-dehydrogenase                                                                   |
| 4677361 | C C C C C C T   | STM4433    | - myo-inositol 2-dehydrogenase                                                                   |
| 4680574 | C C C C T C C   | STM4436    | - putative endonuclease                                                                          |
| 4688204 | A A A G G G G   | STM4446    | - putative selenocysteine synthase                                                               |
| 4688218 | G A G G G G G   | STM4446    | - putative selenocysteine synthase                                                               |
| 4692783 | T T T T T T C   | STM4452    | <i>nrdD</i> anaerobic ribonucleoside triphosphate reductase                                      |
| 4695056 | C C C T C C C   | STM4452.1N | - hypothetical protein                                                                           |
| 4696102 | A A G G G G G   | STM4453    | <i>treC</i> trehalose-6-phosphate hydrolase                                                      |
| 4696794 | A A A G G G G   |            |                                                                                                  |
| 4704522 | C T C C C C C   | STM4460    | <i>pyrB</i> aspartate carbamoyltransferase catalytic subunit                                     |
| 4710799 | A A G A A A A   |            |                                                                                                  |
| 4714926 | T T C T T T T   |            |                                                                                                  |
| 4721265 | C C C C T C     |            |                                                                                                  |
| 4723337 | T T T T T T C   | STM4477    | <i>pepA</i> leucyl aminopeptidase                                                                |
| 4726062 | G G A A A A A   | STM4479    | <i>yjgP</i> putative permease                                                                    |
| 4726414 | G A G G G G G   | STM4482    | <i>idnT</i> L-idonate transport protein                                                          |
| 4728225 | C C C C C C T   | STM4482    | <i>idnT</i> L-idonate transport protein                                                          |
| 4728664 | G G G G G G T   | STM4484    | <i>idnD</i> L-idonate 5-dehydrogenase                                                            |
| 4731205 | A A A T T T T   | STM4484    | <i>idnD</i> L-idonate 5-dehydrogenase                                                            |
| 4738039 | T T T T C T T   | STM4491    | - putative ATP-dependent Lon protease                                                            |
| 4739510 | C C C C C T C   | STM4492    | - putative cytoplasmic protein<br>putative ABC-type sugar/spermidine/putrescine transport system |
| 4743011 | G G A G G G G   | STM4494    | - ATPase component                                                                               |
| 4743454 | G A A A A A A   | STM4495    | - putative type II restriction enzyme methylase subunit                                          |
| 4744946 | G G G G G A G   | STM4495    | - putative type II restriction enzyme methylase subunit                                          |
| 4744948 | T T T T T T C   | STM4495    | - putative type II restriction enzyme methylase subunit                                          |
| 4745869 | G G A G G G G   | STM4495    | - putative type II restriction enzyme methylase subunit                                          |
| 4759191 | A A A A T A A   | STM4504    | - putative cytoplasmic protein                                                                   |
| 4759294 | A A A A A A G   | STM4504    | - putative cytoplasmic protein                                                                   |
| 4769942 | C C C T C C C   | STM4515    | <i>yjij</i> putative sugar transporter                                                           |
| 4773172 | C T C C C C C   | STM4517    | <i>yjiO</i> putative transport protein                                                           |
| 4774303 | G G G G G G A   |            |                                                                                                  |
| 4774507 | A A A A C A A   | STM4519    | - putative NAD-dependent aldehyde dehydrogenase                                                  |
| 4775386 | C C A A C C C   | STM4519    | - putative NAD-dependent aldehyde dehydrogenase                                                  |
| 4776414 | G G A G G G G   | STM4522    | - putative inner membrane protein                                                                |
| 4776612 | T T C C C C C   | STM4522    | - putative inner membrane protein                                                                |
| 4779280 | T T T C C C C   | STM4525    | <i>hsdM</i> DNA methylase M                                                                      |
| 4781357 | G G T T T T T   | STM4526    | <i>hsdR</i> type I restriction enzyme EcoKI subunit R                                            |
| 4782055 | C C C C A C C   | STM4526    | <i>hsdR</i> type I restriction enzyme EcoKI subunit R                                            |
| 4784402 | T T T C T C T   |            |                                                                                                  |
| 4789826 | C C C T C C C   |            |                                                                                                  |
| 4792592 | A A A A A A G   | STM4534    | - putative transcriptional regulator                                                             |
| 4797427 | G G G G G A A   | STM4538    | - putative PTS permease                                                                          |
| 4797660 | A A A G A A A   | STM4539    | - putative glucosamine-fructose-6-phosphate aminotransferase                                     |
| 4798048 | G G C G G G G   | STM4539    | - putative glucosamine-fructose-6-phosphate aminotransferase                                     |
| 4799038 | G G G A A A A   | STM4540.S  | - putative glucosamine-fructose-6-phosphate aminotransferase                                     |
| 4802775 | C C C C C T C   |            |                                                                                                  |
| 4808578 | G G T G G G G   | STM4550    | <i>fhuF</i> ferric iron reductase involved in ferric hydroxamate transport                       |
| 4809421 | C C C C C C T   | STM4551    | - hypothetical protein                                                                           |
| 4809660 | T T C C C C C   | STM4551    | - hypothetical protein                                                                           |
| 4809879 | A G A A A A A   | STM4551    | - hypothetical protein                                                                           |
| 4810102 | G G T T T T T   | STM4551    | - hypothetical protein                                                                           |
| 4814121 | G G A G G G G   | STM4560    | <i>prfC</i> peptide chain release factor 3                                                       |
| 4815318 | C C C C C T C   | STM4560    | <i>prfC</i> peptide chain release factor 3                                                       |
| 4815575 | T T T C T T T   |            |                                                                                                  |
| 4818418 | C C T C C C C   | STM4564    | <i>yjiv</i> putative deoxyribonuclease Yjiv                                                      |
| 4818528 | C C C T C C C   | STM4564    | <i>yjiv</i> putative deoxyribonuclease Yjiv                                                      |
| 4821799 | A A A A G A A   | STM4567    | <i>deoC</i> deoxyribose-phosphate aldolase                                                       |
| 4825467 | T T T T T T G   | STM4570    | <i>deoD</i> purine nucleoside phosphorylase                                                      |
| 4829063 | A A G A A A A   | STM4573    | <i>stjC</i> putative periplasmic chaperone protein                                               |
| 4832867 | C G G G G G G   | STM4577    | <i>smp</i> hypothetical protein                                                                  |
| 4832868 | G C C C C C C   | STM4577    | <i>smp</i> hypothetical protein                                                                  |
| 4834494 | A A A A A A G   | STM4579    | <i>radA</i> DNA repair protein RadA                                                              |
| 4838783 | A A A A A A G   | STM4581    | <i>yjik</i> putative ABC transporter ATP-binding protein                                         |
| 4841924 | A A A A A A G   | STM4584    | <i>yjix</i> NTPase                                                                               |
| 4845204 | A A G G G G G   | STM4589    | <i>creC</i> sensory histidine kinase CreC                                                        |



|         |   |   |   |   |   |   |   |   |         |             |                                 |
|---------|---|---|---|---|---|---|---|---|---------|-------------|---------------------------------|
| 4847906 | T | G | T | T | T | T | T | T | STM4591 | <i>sthE</i> | putative major fimbrial subunit |
| 4848918 | C | C | T | C | C | C | C | C |         |             |                                 |
| 4850062 | A | A | C | C | C | C | C | C | STM4593 | <i>sthB</i> | putative fimbrial usher protein |
| 4851987 | A | A | G | A | A | A | A | A | STM4593 | <i>sthB</i> | putative fimbrial usher protein |
| 4854108 | G | G | G | T | G | G | G | G | STM4596 | -           | putative inner membrane protein |
| 4856993 | A | A | C | C | C | C | C | C | STM4600 | <i>IasT</i> | putative RNA methyltransferase  |

---

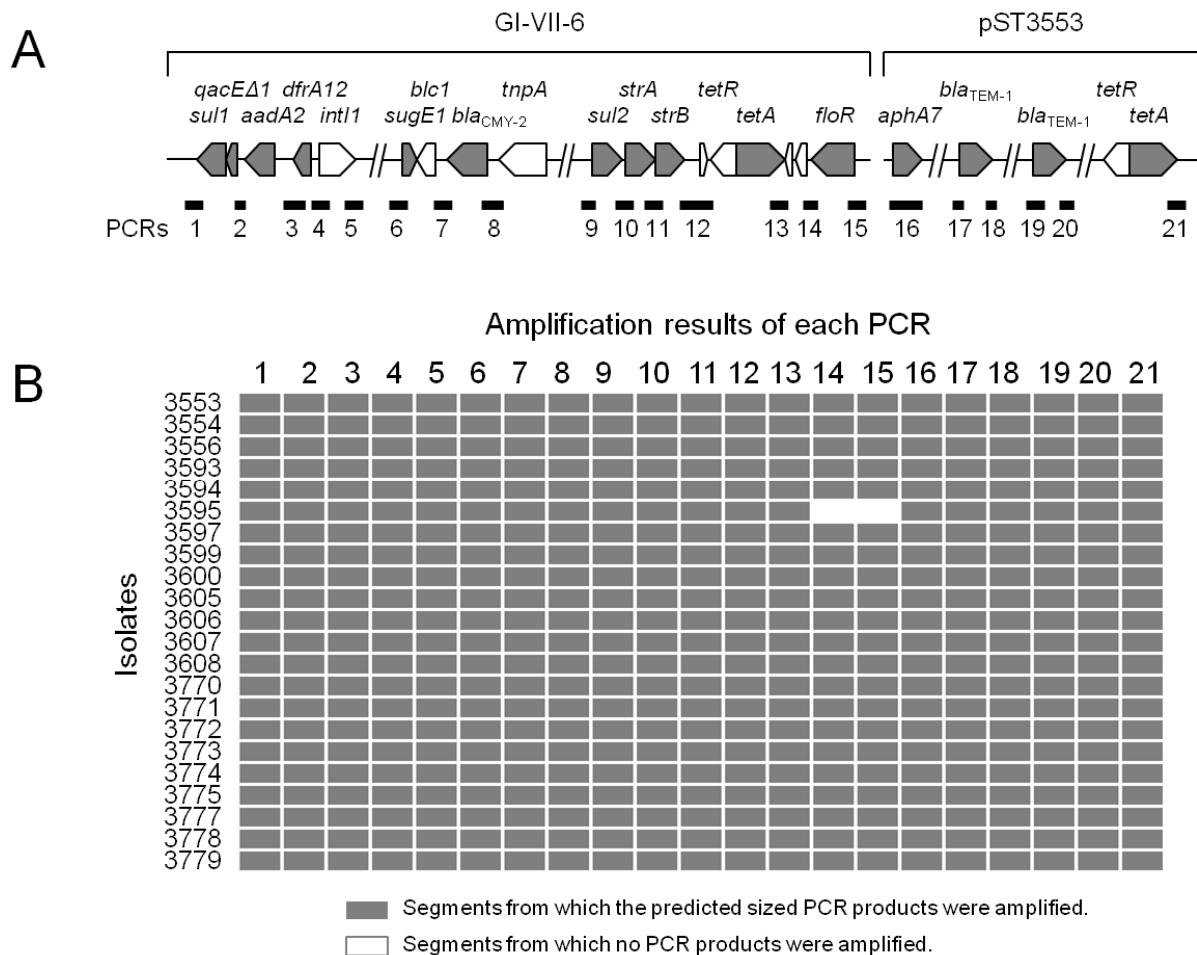

**FIG. S1.** Summary for PCR mapping of resistance regions among 22 clonally related *S. Typhimurium* isolates. (A) Schematic representation of the structure of antimicrobial resistance regions in GI-VII-6 and pST3553 by PCR amplification of 21 fragments containing the 5' and/or 3' end of each resistance gene. (B) Gray and white rectangles indicate segments from which the predicted size of PCR products were amplified or not amplified, respectively.

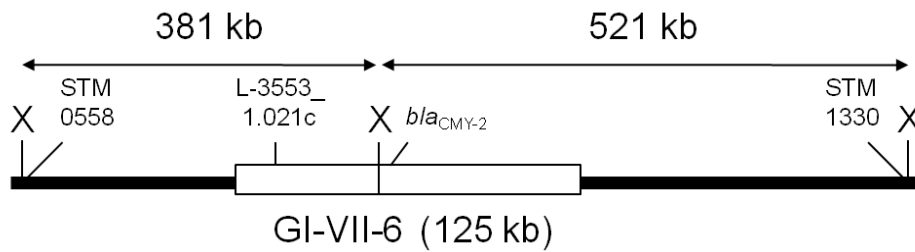

**FIG. S2.** Schematic view of predicted XbaI-digested fragments containing GI-VII-6 based on the sequence data of *S. Typhimurium* strain LT2 (GenBank accession no. AE006468). The open rectangle indicates GI-VII-6 integrated in the chromosome of *S. Typhimurium*. “X,” refers to XbaI restriction sites. To detect fragments of the predicted sizes of 381 kb and 521 kb, Southern blot analysis was performed using probes hybridized with genes STM0558 and L-3553\_1.021c for the 381-kb fragment, and *bla*<sub>CMY-2</sub> and STM1330 for the 521-kb fragment.
